# Supplementary material for: Visible-light TiO2-catalyzed synthesis of dihydrobenzofurans by oxidative [3 + 2] annulation of phenols with alkenyl phenols
Source: Royal Society of Chemistry journal article supplement (doi:10.1039/d4sc00723a), 2024-01-01
Supplement: d4sc00723a1.pdf [file d4sc00723a1.pdf]

## Supporting Information

# Visible-Light TiO<sub>2</sub>-Catalyzed Synthesis of Dihydrobenzofurans by Oxidative [3+2] Annulation of Phenols with Alkenyl Phenols

Jingze Wu, Yaning Liu and Marisa Kozlowski\*

Department of Chemistry, Roy and Diana Vagelos Laboratories, University of Pennsylvania, Philadelphia, Pennsylvania 19104-6323, United States

\* To whom correspondence should be addressed: marisa@sas.upenn.edu

### Table of Contents

|                                       |          |
|---------------------------------------|----------|
| 1. General considerations             | S2       |
| 2. General procedures                 | S2-S3    |
| 3. Optimization and control reactions | S4-S7    |
| 4. Additional studies                 | S7-S21   |
| 5. Unreactive substrates              | S21      |
| 6. Characterizations                  | S22-S44  |
| 7. Computational details              | S45-S48  |
| 8. Calculated structures and energies | S49-S70  |
| 9. NMR spectra                        | S71-S98  |
| 10. References                        | S99-S100 |

## General Considerations

Reactions were performed in round-bottom flasks with a IKA C-MAG HS7 stir plates. When necessary, solvents were dried and purified before use via a solvent purification system (THF). Other commercial reagents were used without additional purification. For light irradiation, a Kessil PR160L blue LED lamp ( $\lambda_{\text{max}} = 440 \text{ nm}$ , 100% intensity, max 45 W, 5 cm from wall of flask) was employed with a commercial blade fan for cooling and a commercial mirror for light reflection.

Titanium dioxide ( $\text{TiO}_2$ ) (anatase) used in this reaction was purchased from Fisher (Acros organics): Titanium(IV) oxide, 98.0-100.5%  $\text{TiO}_2$  ( $\leq 10 \mu\text{m}$ ), Code 277370010; Lot A0422338.

Analytical thin layer chromatography (TLC) was performed on EM Reagents 0.25 mm silica-gel 254-F plates. Visualization of the TLC plates was accomplished with UV light. Automated flash chromatography was performed using a Teledyne ISCO CombiFlash® (254 nm & 280 nm UV detector) with RediSep Rf Gold® disposable silica columns (60 Å porosity, 20–40  $\mu\text{m}$ ) or flash chromatography with forced flow of the indicated solvent system on Silica-P flash silica gel (50-63  $\mu\text{m}$  mesh particle size). NMR spectra ( $^1\text{H}$ ,  $^{13}\text{C}$ ) were recorded on a Fourier transform NMR spectrometer equipped with an autosampler at 298 K using field strengths of 400/600 MHz and 151 MHz, respectively. Chemical shifts are reported relative to the solvent resonance peak  $\delta$  7.26 ( $\text{CDCl}_3$ ) for  $^1\text{H}$  NMR spectra and  $\delta$  77.16 ( $\text{CDCl}_3$ ) for  $^{13}\text{C}$  NMR spectra. Data are reported as follows: chemical shift, multiplicity (s = singlet, d = doublet, t = triplet, q = quartet, b = broad singlet, m = multiplet, qd = quartet of doublet, hept = heptet), coupling constants, and number of protons. Accurate mass measurement analyses were acquired using an LCMS with electrospray ionization (ESI). The software calibrates the instruments, and reports measurements, by use of neutral atomic masses; the mass of the electron is not subtracted (positive ions) or added (negative ions). Unless otherwise noted, yields refer to isolated material following silica gel chromatography and purity is determined by  $^1\text{H}$  NMR spectroscopy.

## General Procedure A: Preparation of Alkenyl Phenols

To a flame-dried round-bottom flask,  $\text{KO}i\text{Bu}$  (2.0 equiv.) and ethyltriphenylphosphonium bromide (2.0 equiv) were added. The flask was sealed and charged with an atmosphere of argon after three cycles of evacuation/backfill using a Schlenk manifold. Sufficient dry THF (see individual procedures for amounts) was added to give an ylide solution, which was orange or yellow colored. After stirring for 2 h at room temperature, the mixture was cooled to 0 °C and benzaldehyde (1.0 equiv) in dry THF (12 mL) was added dropwise. The reaction mixture was stirred and allowed to slowly warm to room temperature. After stirring 12 h, the mixture was quenched with 2 N HCl. Saturated sodium bicarbonate solution was added, and the resultant mixture was extracted using EtOAc three times. The combined organic layers were washed with brine and deionized water, dried over anhydrous  $\text{Na}_2\text{SO}_4$ , and concentrated. Chromatography (EtOAc/hexanes) afforded the product as a yellow oil.

## General Procedure B: Reaction Optimization

To a 100 mL round-bottom flask, 2-*tert*-butyl-4-methoxyphenol (200 mg, 2.0 equiv), isoeugenol (93 mg, 1.0 equiv),  $\text{TiO}_2$  (448 mg, 10.0 equiv), and 1:1 ratio of hexafluoroisopropanol and trifluorotoluene (4 mL) were added. The round bottom flask was capped with a rubber septum. An air balloon was inserted to the round bottom flask above the

solvent level using a hypodermic needle. During the reaction the round bottom flask was irradiated with two 440 nm blue Kessil lamps on 100% power and five cm from the round bottom flask. A glass mirror was placed below the round bottom flask and a commercial fan was placed next to the round bottom flask for cooling. The reaction mixture was sampled during the reaction to monitor the conversion.

### General Procedure C: Reaction Scope

To a 100 mL round-bottom flask, phenol (1.12 mmol, 2.0 equiv), alkenyl phenol (0.56 mmol, 1.0 equiv),  $\text{TiO}_2$  (5.6 mmol, 10.0 equiv), and 1:1 ratio of hexafluoroisopropanol and trifluorotoluene (0.14 M, 4 mL) were added. The round bottom flask was capped with a rubber septum, and an air balloon was inserted to the round bottom flask above the solvent level using a hypodermic needle. During the reaction the round bottom flask was irradiated with one 440 nm blue Kessil lamp on 100% power and five cm from the round bottom flask for the indicated time. A glass mirror was placed below the round bottom flask and a commercial fan was placed next to the round bottom flask for cooling.

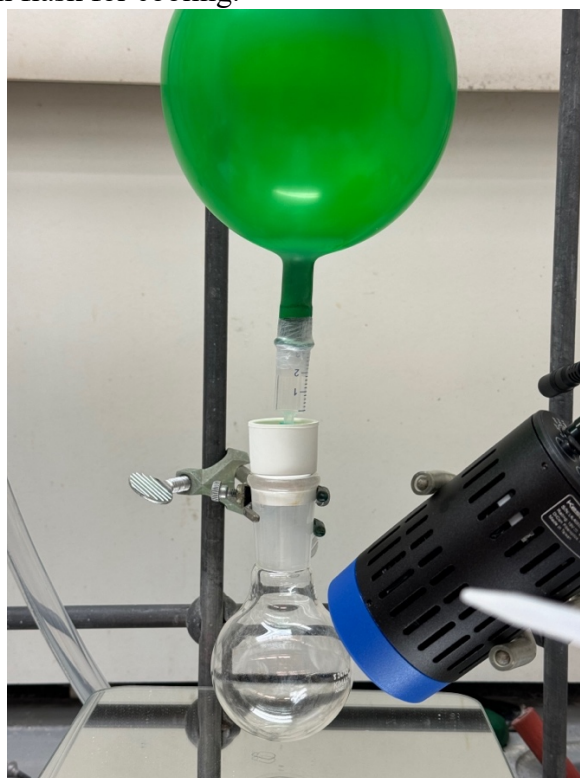

Figure S1: Example reaction assembly.

### General Procedure D: Purification

The unpurified reaction mixture was added to a 50 mL plastic Falcon centrifuge tube together with methanol rinses from the round bottom flask. The resultant reaction mixture was centrifuged at 4000 rpm for five min. The top liquid layer was collected, the bottom solid residual ( $\text{TiO}_2$ ) was collected and washed with 25 mL methanol and centrifuged at 4000 rpm for 5 min again. The  $\text{TiO}_2$  residual was washed two further times. The reaction mixture and the methanol from washing the residual  $\text{TiO}_2$  were combined and concentrated. The resultant material was purified by silica gel column chromatography to afford pure products as determined by  $^1\text{H}$ - and  $^{13}\text{C}$ -NMR spectroscopy.

**Table S1.** Optimization of reaction conditions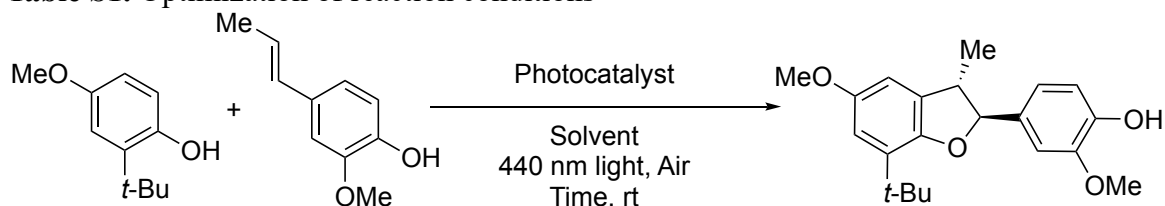

| Entry <sup>[a]</sup> | Time (h) | Isoeugenol (equiv) | BHA (equiv) | TiO <sub>2</sub> (equiv) | Solvent         | Yield (%) <sup>[a]</sup> |
|----------------------|----------|--------------------|-------------|--------------------------|-----------------|--------------------------|
| 1                    | 12       | 1.5                | 1.0         | 10                       | HFIP            | 38                       |
| 2                    | 6        | 1.5                | 1.0         | 10                       | HFIP            | 32                       |
| 3                    | 6        | 1.0                | 1.0         | 10                       | HFIP            | 42                       |
| 4                    | 6        | 1.0                | 2.0         | 10                       | HFIP            | 59                       |
| 5                    | 6        | 3.0                | 1.0         | 10                       | HFIP            | 2                        |
| 6                    | 6        | 1.0                | 1.0         | 10                       | HFIP/TFT (1:1)  | 54                       |
| 7                    | 6        | 1.0                | 2.0         | 10                       | HFIP/TFT (1:1)  | 66                       |
| 8                    | 6        | 1.0                | 5.0         | 10                       | HFIP/TFT (1:1)  | 35                       |
| 9                    | 6        | 1.0                | 2.0         | 10                       | HFIP/MeCN (1:1) | 51                       |

[a] Reaction conditions: general procedure C was followed using *iso*-eugenol (**2a**) (0.56 mmol, 1.00 equiv), 2-*tert*-butyl-4-methoxyphenol (1.12 mmol, 2.00 equiv), TiO<sub>2</sub> (x equiv) and solvent (4.00 mL, 0.14 M) for x h. [b] yield after chromatography.

**Table S2.** Control reactions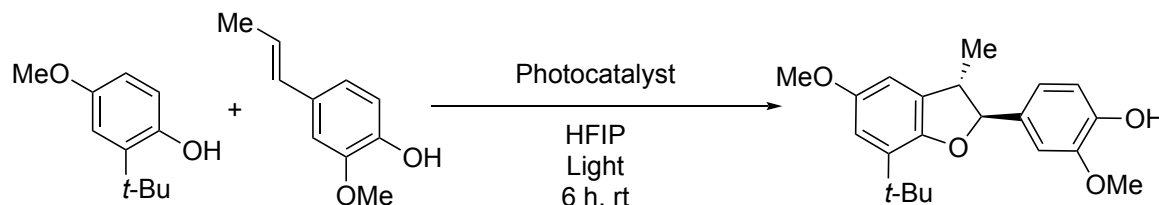

| Entry <sup>[c]</sup> | Photocatalyst             | Light <sup>[d]</sup> | Oxidant | Yield |
|----------------------|---------------------------|----------------------|---------|-------|
| 1                    | 10 equiv TiO <sub>2</sub> | dark <sup>[d]</sup>  | Air     | /     |
| 2                    | 10 equiv TiO <sub>2</sub> | 440 nm light         | Argon   | /     |
| 3                    | /                         | 440 nm light         | Air     | /     |

[a] Reaction conditions: 0.56 mmol *iso*-eugenol (**2a**), 1.12 mmol 2-*tert*-butyl-4-methoxyphenol, x equiv TiO<sub>2</sub>, 4.0 mL HFIP, irradiation 440 nm Kessil lamp; five cm distance for 6 h under 1 atm Air (unless otherwise mentioned in the reaction conditions). For reactions in the dark, the round bottom flasks were covered with aluminium foil.



### Cu(OAc)<sub>2</sub> catalyzed<sup>1</sup> reaction for model substrate **3eg**:

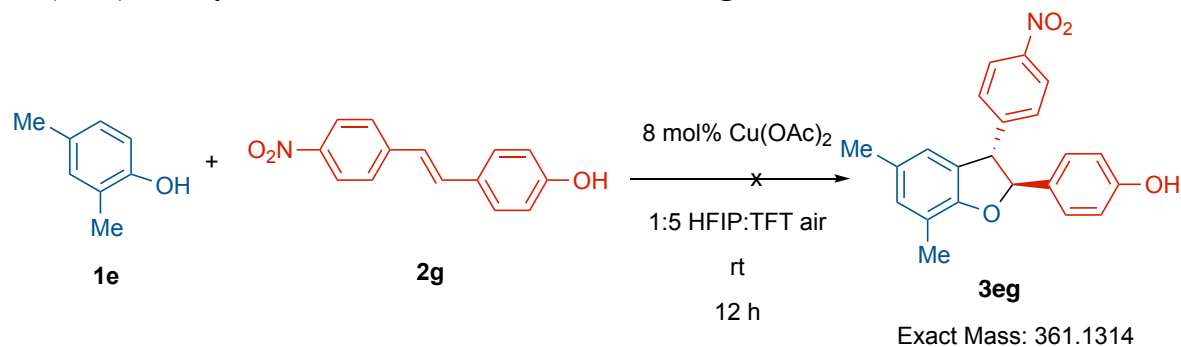

### Scheme S1. Cu(OAc)<sub>2</sub> catalyzed reaction for the synthesis of **3eg**

To a 100 mL round-bottom flask, Cu(OAc)<sub>2</sub> (0.048 mmol, 0.08 equiv), and 1:5 ratio of hexafluoroisopropanol and trifluorotoluene (0.10 M, 6 mL) were added. Cu(OAc)<sub>2</sub> would not dissolve in 6 mL HFIP:TFT (1:5). The Cu(OAc)<sub>2</sub> solution was then sonicated for 10 minutes, no change in Cu(OAc)<sub>2</sub> dissolution. Then 2,4-dimethylphenol (0.60 mmol, 1.0 equiv), 4-(4-nitrostyryl)phenol (0.66 mmol, 1.1 equiv), were added to the Cu(OAc)<sub>2</sub> solution. The round bottom flask was capped with a rubber septum, and an air balloon was inserted to the round bottom flask above the solvent level using a hypodermic needle. Aliquots (10  $\mu\text{L}$ ) were withdrawn from the flask at 12 h. The aliquots were diluted to 0.001 M with MeOH (990  $\mu\text{L}$ ). This solution (2  $\mu\text{L}$ ) was injected into the UPLCMS for crude analysis. No conversion of either substrate was observed on UPLCMS result.

**UPLC:** C18 column (2.1 mm x 5 cm). Flow rate = 0.5 mL/min. Mobile phase gradient: 50% MeCN/H<sub>2</sub>O with 0.1% formic acid for 0.5 min, changed to 95% MeCN/H<sub>2</sub>O with 0.1% formic over 2 min and held for 0.5 min, reduced to 5% MeCN/H<sub>2</sub>O with 0.1% formic acid over 5 s and held for an additional 25 s. Detection = UV-Vis (TWC)

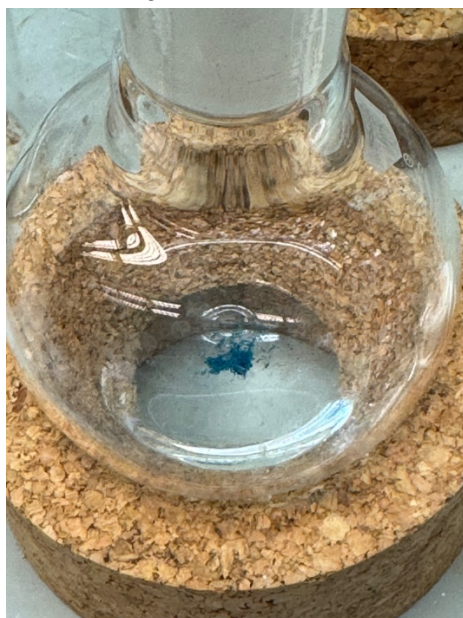

**Figure S2:** Cu(OAc)<sub>2</sub> in 6 mL (1:5 HFIP:TFT) after sonicating for 10 minutes.

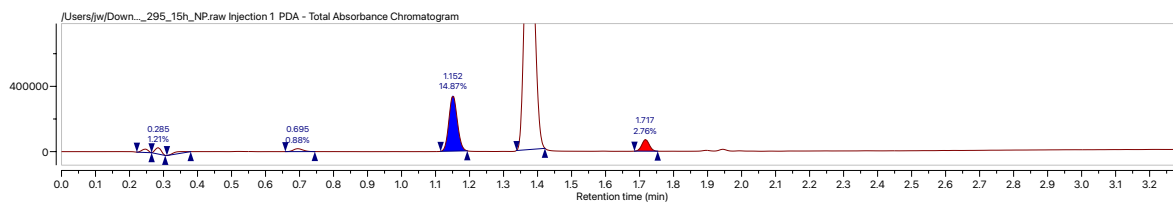

**Figure S3:** UPLC trace for crude reaction mixture after 12 h.  $t_R$  (**2g**) = 1.15 min,  $t_R$  (**1e**) = 1.72 min,  $t_R$  (TFT) = 1.37 min

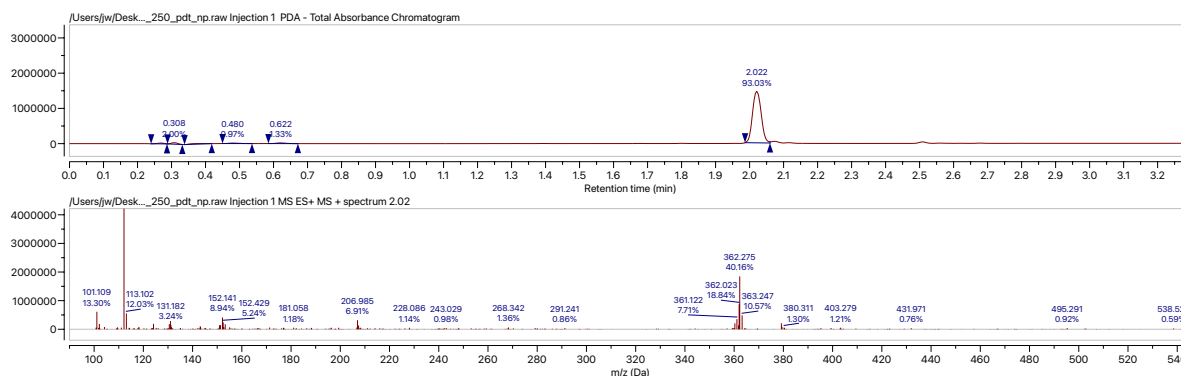

**Figure S4:** UPLCMS-ESI<sup>+</sup> trace for **3eg**.  $t_R$  (**3eg**) = 2.02 min. ESI<sup>+</sup>MS:  $t_R$  (**3eg**) = 2.02 min,  $m/z$  = 362.275.

### MesAcr<sup>+</sup>BF<sub>4</sub><sup>-</sup> catalyzed reaction for model substrate **3eg**:

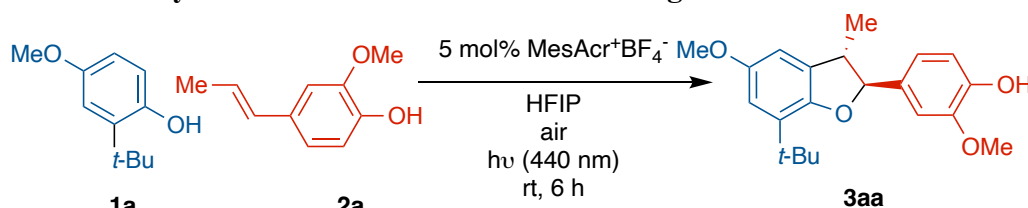

**Scheme S2.** Acridinium catalyzed reaction for the synthesis of **3aa**

To a 100 mL round-bottom flask, 2-*tert*-butyl-4-methoxyphenol (1.20 mmol, 2.0 equiv), *iso*-eugenol (0.60 mmol, 1.0 equiv) 9-mesityl-10-methylacridinium tetrafluoroborate (0.030 mmol, 0.05 equiv), and hexafluoroisopropanol (0.10 M, 6 mL) were added. The round bottom flask was capped with a rubber septum, and an air balloon was inserted to the round bottom flask above the solvent level using a hypodermic needle. During the reaction the round bottom flask was irradiated with one 440 nm blue Kessil lamps on 100% power and five cm from the round bottom flask for the indicated time. A glass mirror was placed below the round bottom flask and a commercial fan was placed next to the round bottom flask for cooling. Aliquots (10  $\mu$ L) were withdrawn from the flask at 6 h. The aliquots were diluted to 0.001 M with MeOH (990  $\mu$ L). This solution (2  $\mu$ L) was injected into the UPLCMS for crude analysis.

The reaction mixture was concentrated on silica gel and purified by silica gel column chromatography (*n*-hexane/EtOAc 85:15) to afford **3aa** (29 mg, 0.084 mmol) in 14% isolated yield.

**UPLC:** C18 column (2.1 mm x 5 cm). Flow rate = 0.5 mL/min. Mobile phase gradient: 50% MeCN/H<sub>2</sub>O with 0.1% formic acid for 0.5 min, changed to 95% MeCN/H<sub>2</sub>O with 0.1% formic over 2 min and held for 0.5 min, reduced to 5% MeCN/H<sub>2</sub>O with 0.1% formic acid over 5 s and held for an additional 25 s. Detection = UV-Vis (TWC)

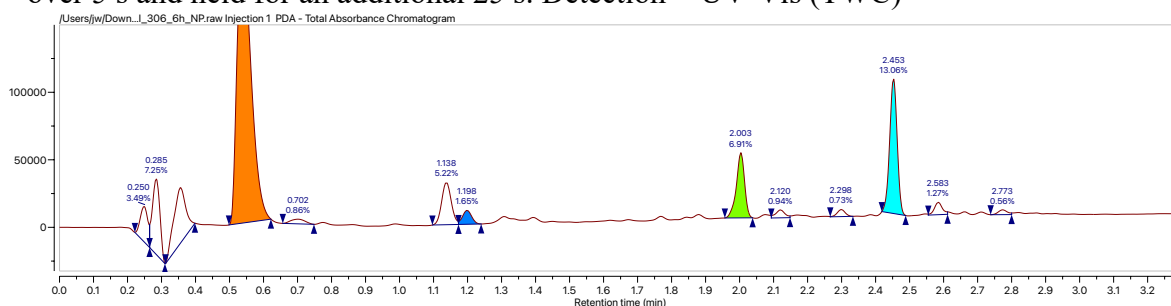

**Figure S5:** UPLC spectrum for the reaction of **3aa** after 6 hours.  $t_R$  ( $\text{MesAcr}^+\text{BF}_4^-$ ) = 0.55 min,  $t_R$  (**1a**) = 1.20 min,  $t_R$  (**3aa**) = 2.00 min,  $t_R$  (over oxidized adduct) = 2.45 min

## Additional studies:

### Mechanism studies:

#### Kinetic study:

To a 100 mL round-bottom flask, isoeugenol (0.56 mmol, 1.0 equiv), TiO<sub>2</sub> (5.6 mmol, 5.0 equiv), HFIP (0.1 M, 6 mL) were added. The round bottom flask was capped with a rubber septum, and an air balloon was inserted to the round bottom flask above the solvent level using a hypodermic needle. During the reaction the round bottom flask was irradiated with one 440 nm blue Kessil lamps on 100% power and 3 cm from the round bottom flask for the indicated time. A glass mirror was placed below the round bottom flask and a commercial fan was placed next to the round bottom flask for cooling. Aliquots (10  $\mu\text{L}$ ) were withdrawn from the flask at intervals. The aliquots were diluted to 0.001 M with 0.001 M 4-ethyl anisole as an internal standard in MeOH (990  $\mu\text{L}$ ). The sample was passed through a PTFE 0.45  $\mu\text{m}$  syringe filter to remove titanium dioxide. This solution (2  $\mu\text{L}$ ) was injected into the UPLC and the concentration of *iso*-eugenol was determined by UPLC using UV-Vis (TWC) relative to the 4-ethyl anisole with a response factor of 28.83.

**UPLC:** C18 column (2.1 mm x 5 cm). Flow rate = 0.5 mL/min. Mobile phase gradient: 50% MeCN/H<sub>2</sub>O with 0.1% formic acid for 0.5 min, changed to 95% MeCN/H<sub>2</sub>O with 0.1% formic over 2 min and held for 0.5 min, reduced to 5% MeCN/H<sub>2</sub>O with 0.1% formic acid over 5 s and held for an additional 25 s. Detection = UV-Vis (TWC).  $t_R$  (*iso*-eugenol) = 0.9 min,  $t_R$  (4-ethyl anisole) = 1.56 min. The response factor was determined to be 22513834/780882=28.83 from a solution of 1:1 *iso*-eugenol:4-ethyl anisole.

To a 100 mL round-bottom flask, 2-*tert*-butyl-4-methoxyphenol (0.56 mmol, 1.0 equiv), TiO<sub>2</sub> (5.6 mmol, 5.0 equiv), HFIP (0.1 M, 6 mL) were added. The round bottom flask was capped with a rubber septum, and an air balloon was inserted to the round bottom flask above the solvent level using a hypodermic needle. During the reaction the round bottom flask was irradiated with one 440 nm blue Kessil lamps on 100% power and 3 cm from the round bottom flask for the indicated time. A glass mirror was placed below the round bottom flask and a commercial fan was placed next to the round bottom flask for cooling. Aliquots (10  $\mu\text{L}$ ) were withdrawn from the flask at x h intervals. The aliquots were diluted to 0.001 M with 0.001 M 1,3,5-trimethoxybenzene as an internal standard in MeOH (990

$\mu\text{L}$ ). The sample was passed through a PTFE 0.45  $\mu\text{m}$  syringe filter to remove titanium dioxide. This solution (2  $\mu\text{L}$ ) was injected into the UPLC and the concentration of 2-*tert*-butyl-4-methoxyphenol was determined by UPLC using UV-Vis (TWC) relative to the 1,3,5-trimethoxybenzene with a response factor of 0.482.

**UPLC:** C18 column (2.1 mm x 5 cm). Flow rate = 0.5 mL/min. Mobile phase gradient: 50% MeCN/H<sub>2</sub>O with 0.1% formic acid for 0.5 min, changed to 95% MeCN/H<sub>2</sub>O with 0.1% formic over 2 min and held for 0.5 min, reduced to 5% MeCN/H<sub>2</sub>O with 0.1% formic acid over 5 s and held for an additional 25 s. Detection = UV-Vis (TWC).  $t_{\text{R}}$  (2-*tert*-butyl-4-methoxyphenol) = 1.26 min,  $t_{\text{R}}$  (1,3,5-trimethoxybenzene) = 0.939 min. The response factor was determined to be  $22513834/780882=28.83$  from a solution of 1: 2-*tert*-butyl-4-methoxyphenol: 1,3,5-trimethoxybenzene.

To a 100 mL round-bottom flask, 3-*tert*-butyl-4-hydroxyanisole (0.56 mmol, 1.0 equiv), TiO<sub>2</sub> (5.6 mmol, 5.0 equiv), HFIP (0.1 M, 6 mL) were added. The round bottom flask was capped with a rubber septum, and an air balloon was inserted to the round bottom flask above the solvent level using a hypodermic needle. During the reaction the round bottom flask was irradiated with one 440 nm blue Kessil lamps on 100% power and 3 cm from the round bottom flask for the indicated time. A glass mirror was placed below the round bottom flask and a commercial fan was placed next to the round bottom flask for cooling. Aliquots (10  $\mu\text{L}$ ) were withdrawn from the flask at x h intervals. The aliquots were diluted to 0.001 M with 0.001 M 1,3,5-trimethoxybenzene as an internal standard in MeOH (990  $\mu\text{L}$ ). The sample was passed through a PTFE 0.45  $\mu\text{m}$  syringe filter to remove titanium dioxide. This solution (2  $\mu\text{L}$ ) was injected into the UPLC and the concentration of 3-*tert*-butyl-4-methoxyphenol was determined by UPLC using UV-Vis (TWC) relative to the 1,3,5-trimethoxybenzene with a response factor of 0.527.

**UPLC:** C18 column (2.1 mm x 5 cm). Flow rate = 0.5 mL/min. Mobile phase gradient: 50% MeCN/H<sub>2</sub>O with 0.1% formic acid for 0.5 min, changed to 95% MeCN/H<sub>2</sub>O with 0.1% formic over 2 min and held for 0.5 min, reduced to 5% MeCN/H<sub>2</sub>O with 0.1% formic acid over 5 s and held for an additional 25 s. Detection = UV-Vis (TWC).  $t_{\text{R}}$  (3-*tert*-butyl-4-methoxyphenol) = 1.21 min,  $t_{\text{R}}$  (1,3,5-trimethoxybenzene) = 0.94 min. The response factor was determined to be  $431099/818504=0.527$  from a solution of 1: 3-*tert*-butyl-4-methoxyphenol: 1,3,5-trimethoxybenzene.

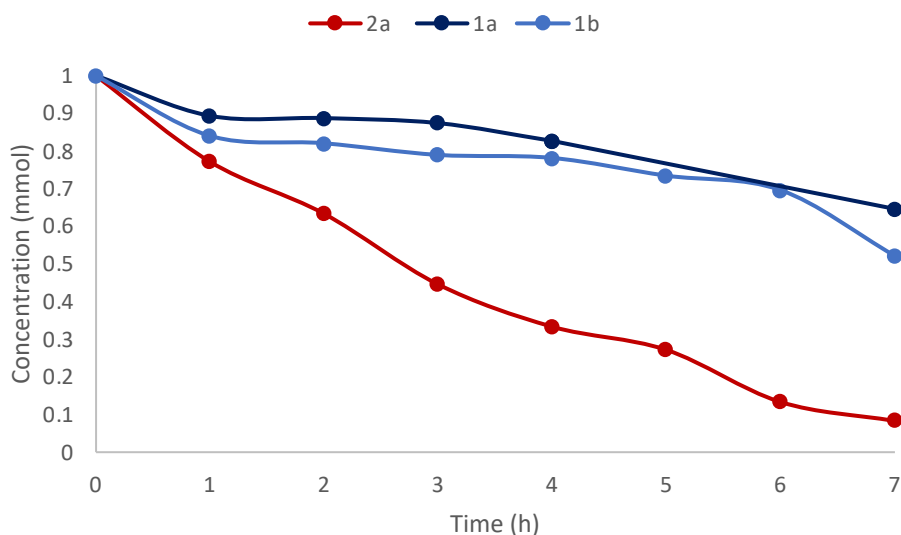

**Figure S6:** Concentration of **2a** vs **1b** vs **1a** over 6 hours of reaction.

**Radical trapping experiment with TEMPO:**

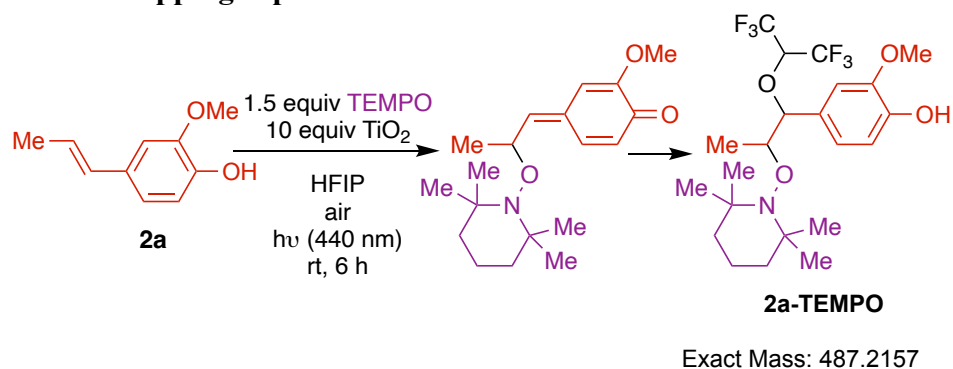

**Scheme S3.** radical trapping study

To a 100 mL round-bottom flask, isoeugenol (0.56 mmol, 1.00 equiv), TiO<sub>2</sub> (5.60 mmol, 10.0 equiv), TEMPO (0.84 mmol, 1.50 equiv), and hexafluoroisopropanol (0.09 M, 6 mL) were added. The round bottom flask was capped with a rubber septum, and an air balloon was inserted to the round bottom flask above the solvent level using a hypodermic needle. During the reaction the round bottom flask was irradiated with one 440 nm blue Kessil lamps on 100% power and five cm from the round bottom flask for the indicated time. A glass mirror was placed below the round bottom flask and a commercial fan was placed next to the round bottom flask for cooling. The unpurified reaction mixture was added to a 50 mL plastic Falcon centrifuge tube together with methanol rinses from the round bottom flask. The resultant reaction mixture was centrifuged at 4000 rpm for 5 min. The top liquid layer was collected, the bottom solid residual (TiO<sub>2</sub>) was collected and washed with methanol (25 mL) and centrifuged at 4000 rpm for 5 min again. The residual TiO<sub>2</sub> was washed two further times. The reaction mixture and the methanol from washing the residual TiO<sub>2</sub> were combined and concentrated on Celite. The mixture on Celite was then purified using a 42 g C18 column. Mobile phase gradient: 10% MeCN/H<sub>2</sub>O with 0.1% formic acid for 5 min, changed to 95% MeCN/H<sub>2</sub>O with 0.1% formic over 15 min and held for 5 min. The isolated fractions containing **2a-TEMPO** were combined, and acetonitrile was subsequently removed. The mixture was then extracted with 100 mL of ethyl acetate and

dried over sodium sulfate. **2a-TEMPO** (74 mg, 0.15 mmol) was obtained in 25% isolated yield.

**UPLC:** C18 column (2.1 mm x 5 cm). Flow rate = 0.5 mL/min. Mobile phase gradient: 50% MeCN/H<sub>2</sub>O with 0.1% formic acid for 0.5 min, changed to 95% MeCN/H<sub>2</sub>O with 0.1% formic over 2 min and held for 0.5 min, reduced to 5% MeCN/H<sub>2</sub>O with 0.1% formic acid over 5 s and held for an additional 25 s. Detection = UV-Vis (TWC)

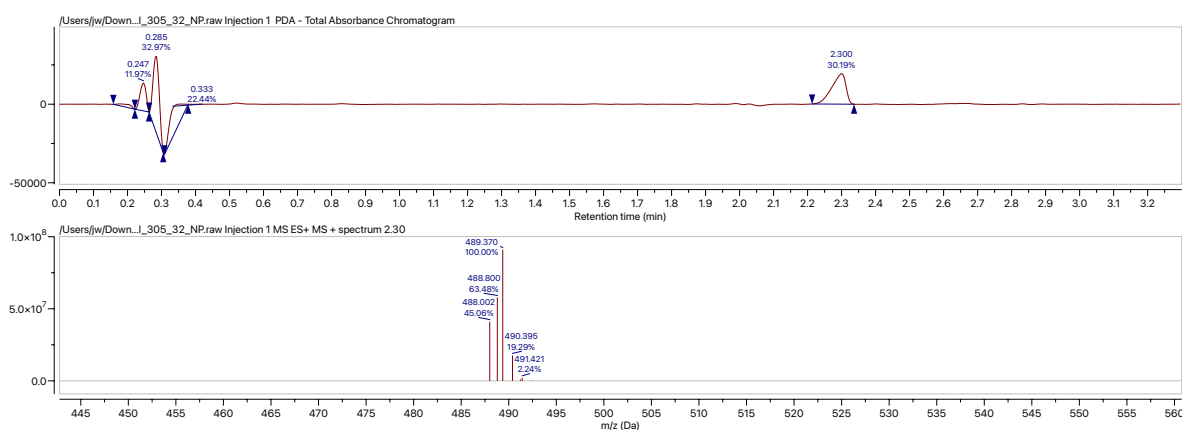

**Figure S7:** UPLCMS spectrum **2a-TEMPO**.  $t_R$  (**2a-TEMPO**) = 2.27 min. ESI<sup>+</sup>MS:  $t_R$  (**2a-TEMPO**) = 2.30 min,  $m/z$  = 489.370.

### Oxidation potential measurements:

#### Cyclic voltammetry (CV) and differential pulse voltammetry (DPV)

Experiments were performed using a CHI-620D potentiostat/galvanostat using a standard three-electrode configuration. The working electrode was a polished glassy carbon electrode (GCE, 3.0 mm diameter, CH Instruments) and the counter electrode was a Pt wire (0.5 mm diameter). Electrochemical potentials were measured against silver pseudo reference electrode (Ag/10 mM AgNO<sub>3</sub> in MeCN). Reported electrochemistry data are calibrated and reported versus the Fc/Fc<sup>+</sup> couple. The supporting electrolyte employed for CV and DPV experiments was 0.1 M tetrabutylammonium hexafluorophosphate (TBAPF<sub>6</sub>), dissolved in dry HFIP (1,1,1,3,3,3-Hexafluoropropan-2-ol). The analyte concentration was 1.0 mM, and all CV experiments were carried out at scan rate of 100 mV/s. Before starting a new CV experiment, the WE was polished and the solution was stirred at least 30 s to ensure complete homogeneity at the electrode/electrolyte interface. The solution was then allowed to rest for at least 2 min to ensure voltammetry was performed on quiescent solutions. All the CV and DPV experiments were performed under an inert atmosphere of Ar.



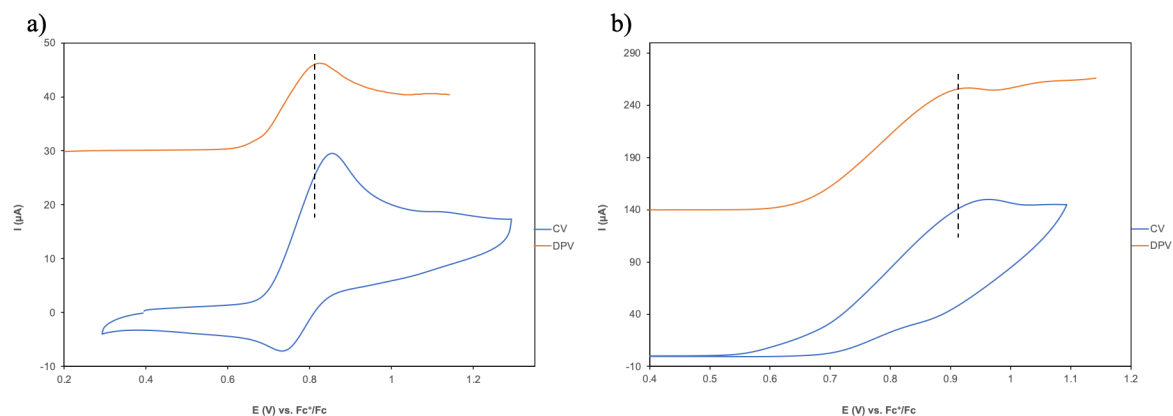

**Figure S8.** a) CV and DPV measurements of **1a**, measured  $E_{ox} = 0.83V$ , b) CV and DPV measurements of **2a**, measured  $E_{ox} = 0.92V$ .

### Potassium iodide test for the presence of $H_2O_2$ :

A solution of freshly-prepared 10% aqueous potassium iodide solution (5 mL) was added to the reaction mixture (4 mL) and allowed to stir for 5 min. Stirring was halted. After the  $TiO_2$  settled, the supernatant had turned from colorless to bright yellow, indicating the presence of  $H_2O_2$ .

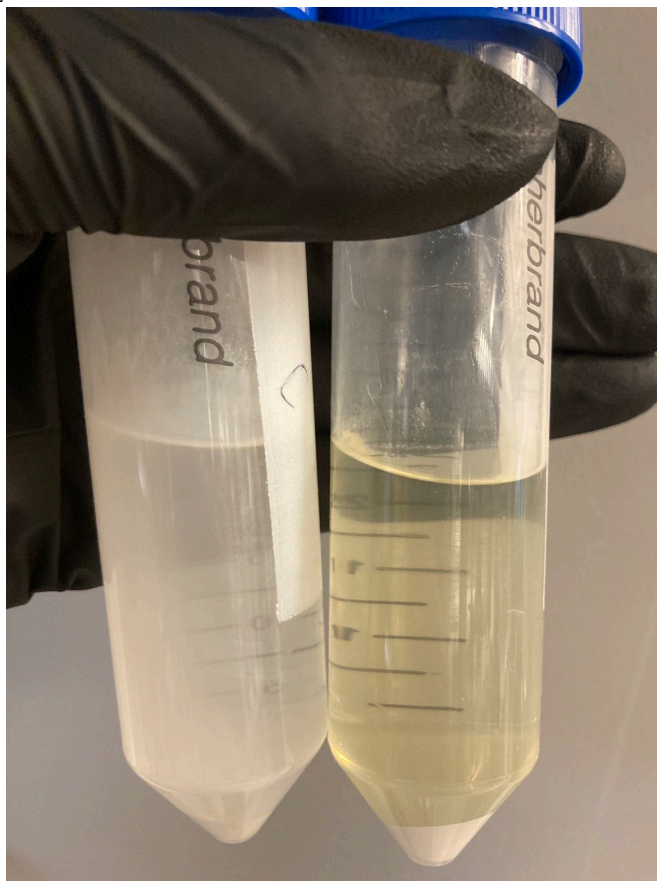

**Figure S9.** KI test on  $TiO_2$  catalyzed phenol-alkenyl phenol coupling (right), control test without KI solution (left).

### $TiO_2$ recyclability study:

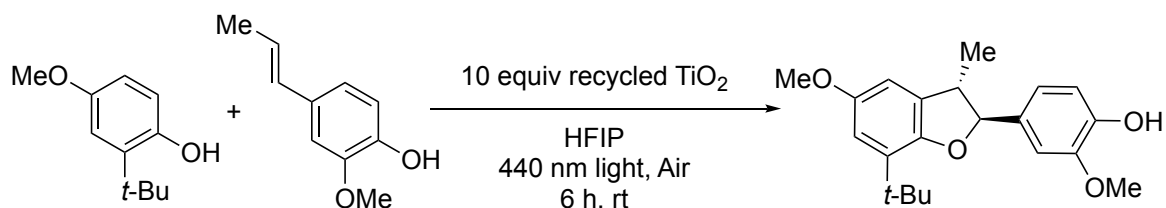

**Scheme S4.** Recycled TiO<sub>2</sub> study

A 100 mL round bottom flask with a stirbar was charged with *iso*-eugenol (0.56 mmol, 1 equiv), 2-*tert*-butyl-4-methoxyphenol (1.12 mmol, 2 equiv), recycled TiO<sub>2</sub> (5.6 mmol, 10 equiv), HFIP:trifluorotoluene (4 mL, 1:1 mixture). The round bottom flask was capped with a rubber septum. An air balloon was inserted to the round bottom flask above the solvent level using a hypodermic needle. During the reaction the round bottom flask was irradiated with two 440 nm blue Kessil lamps on 100% power and 5 cm from the round bottom flask. A glass mirror was placed below the round bottom flask and a commercial fan was placed next to the round bottom flask for cooling. General procedure B was used followed by flash column chromatography (*n*-hexane/EtOAc 85:15).

#### TiO<sub>2</sub> characterization and recycle procedure:

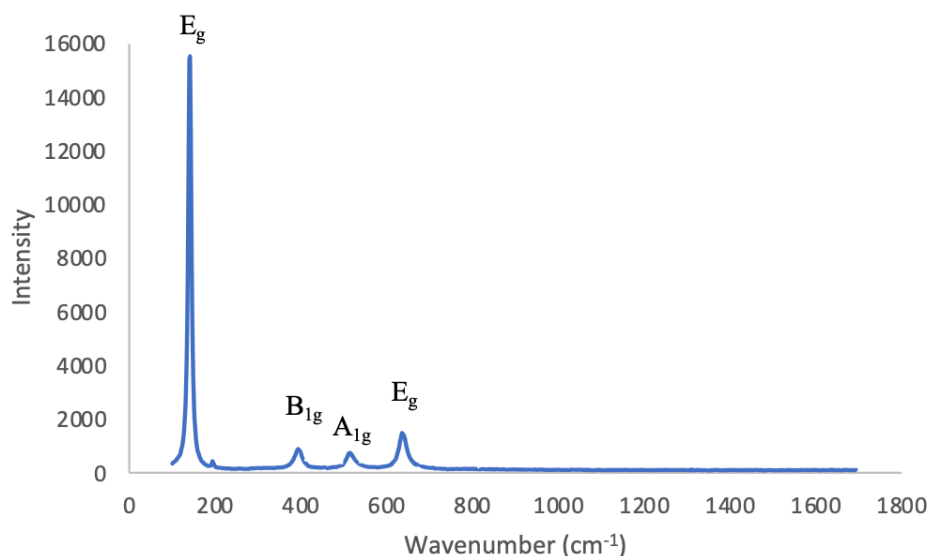

**Figure S10.** Raman spectrum of TiO<sub>2</sub> sample used in the reaction. Raman active modes were assigned and compared to *Sci. Rep.* **2017**, *7*, 8783<sup>2</sup>.



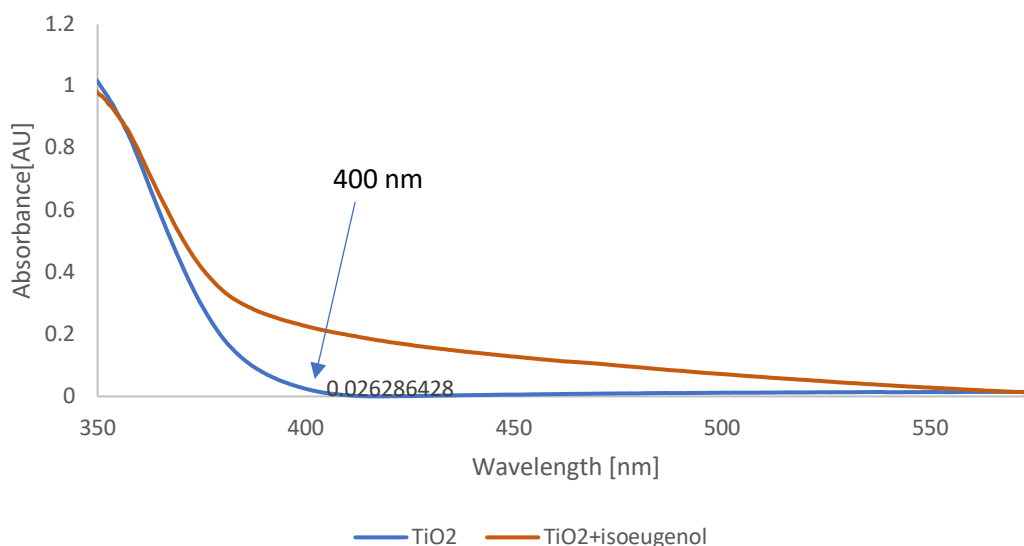

**Figure S11.** Diffuse reflectance spectroscopy (DRS) UV-Vis of new TiO<sub>2</sub>, and TiO<sub>2</sub>-2a mixture for band gap measurement.

TiO<sub>2</sub> band gap is being calculated using the following equation:  $(E)=(h*C)/\lambda$  where  $h=6.63E-34$ ,  $C=3.00E+8$ ,  $\lambda =4.00E-07$ ,  $E=4.84E-19$ , and  $1eV=1.6E-19$  J

The TiO<sub>2</sub> band gap being used in this reaction is calculated to be 3.11 eV.

Recycled TiO<sub>2</sub> from the reaction was collected, centrifuged, and washed with a mixture of MeOH (methanol) and acetone. After centrifugation, the liquid was discarded, and the residual TiO<sub>2</sub> was washed again with MeOH/acetone. This process was repeated three times. Subsequently, the solid TiO<sub>2</sub> residual was transferred to a 100 mL round-bottom flask and treated with 25 mL of a 30% H<sub>2</sub>O<sub>2</sub> (hydrogen peroxide) aqueous solution. After stirring for 6 h under 370 nm light, the mixture was centrifuged to collect the washed TiO<sub>2</sub>. The washed TiO<sub>2</sub> was then dried in a 180 °C oven overnight. Scanning electron microscopy (SEM) and powder X-ray diffraction (powder XRD) were performed to evaluate the structural integrity and particle surface.

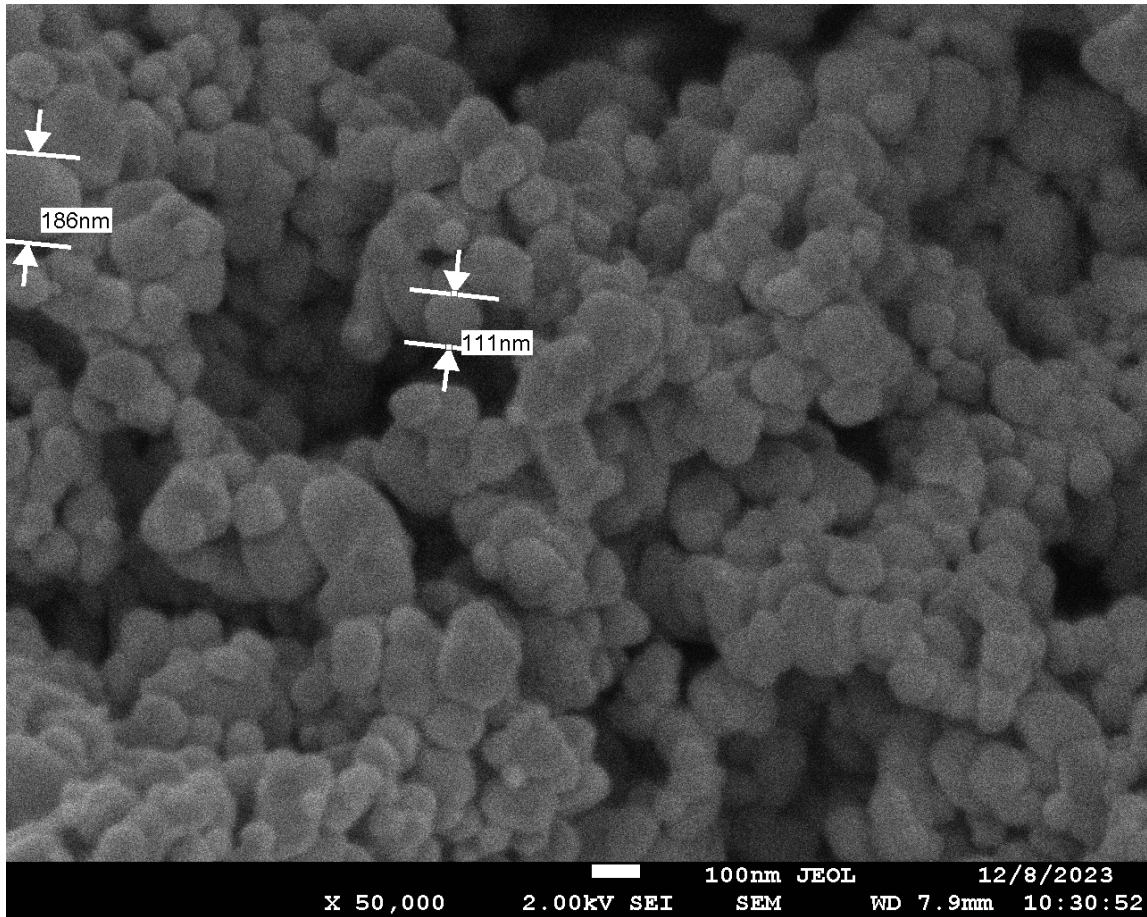

**Figure S12.** SEM imaging of new TiO<sub>2</sub>, average particle size is estimated to be around 150 nm.

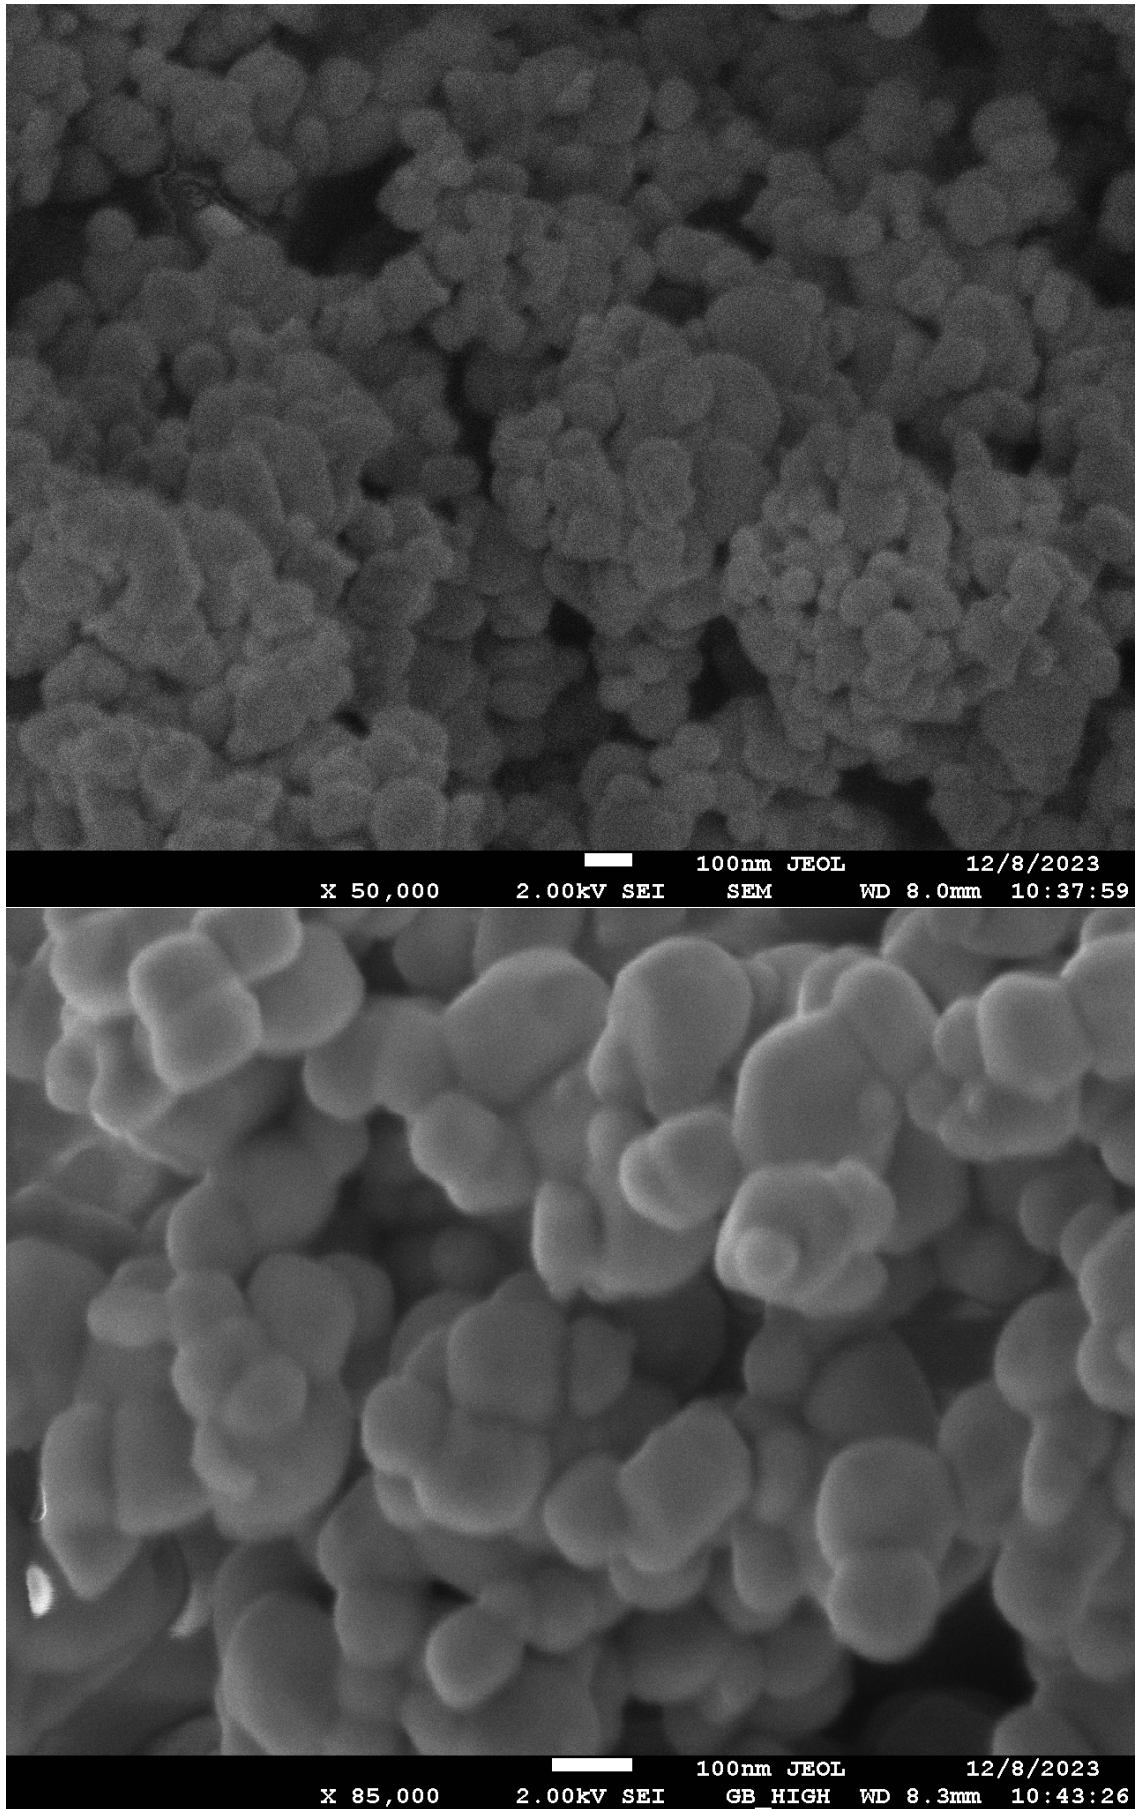

**Figure S13.** SEM imaging of TiO<sub>2</sub> after one use (no H<sub>2</sub>O<sub>2</sub> treatment).

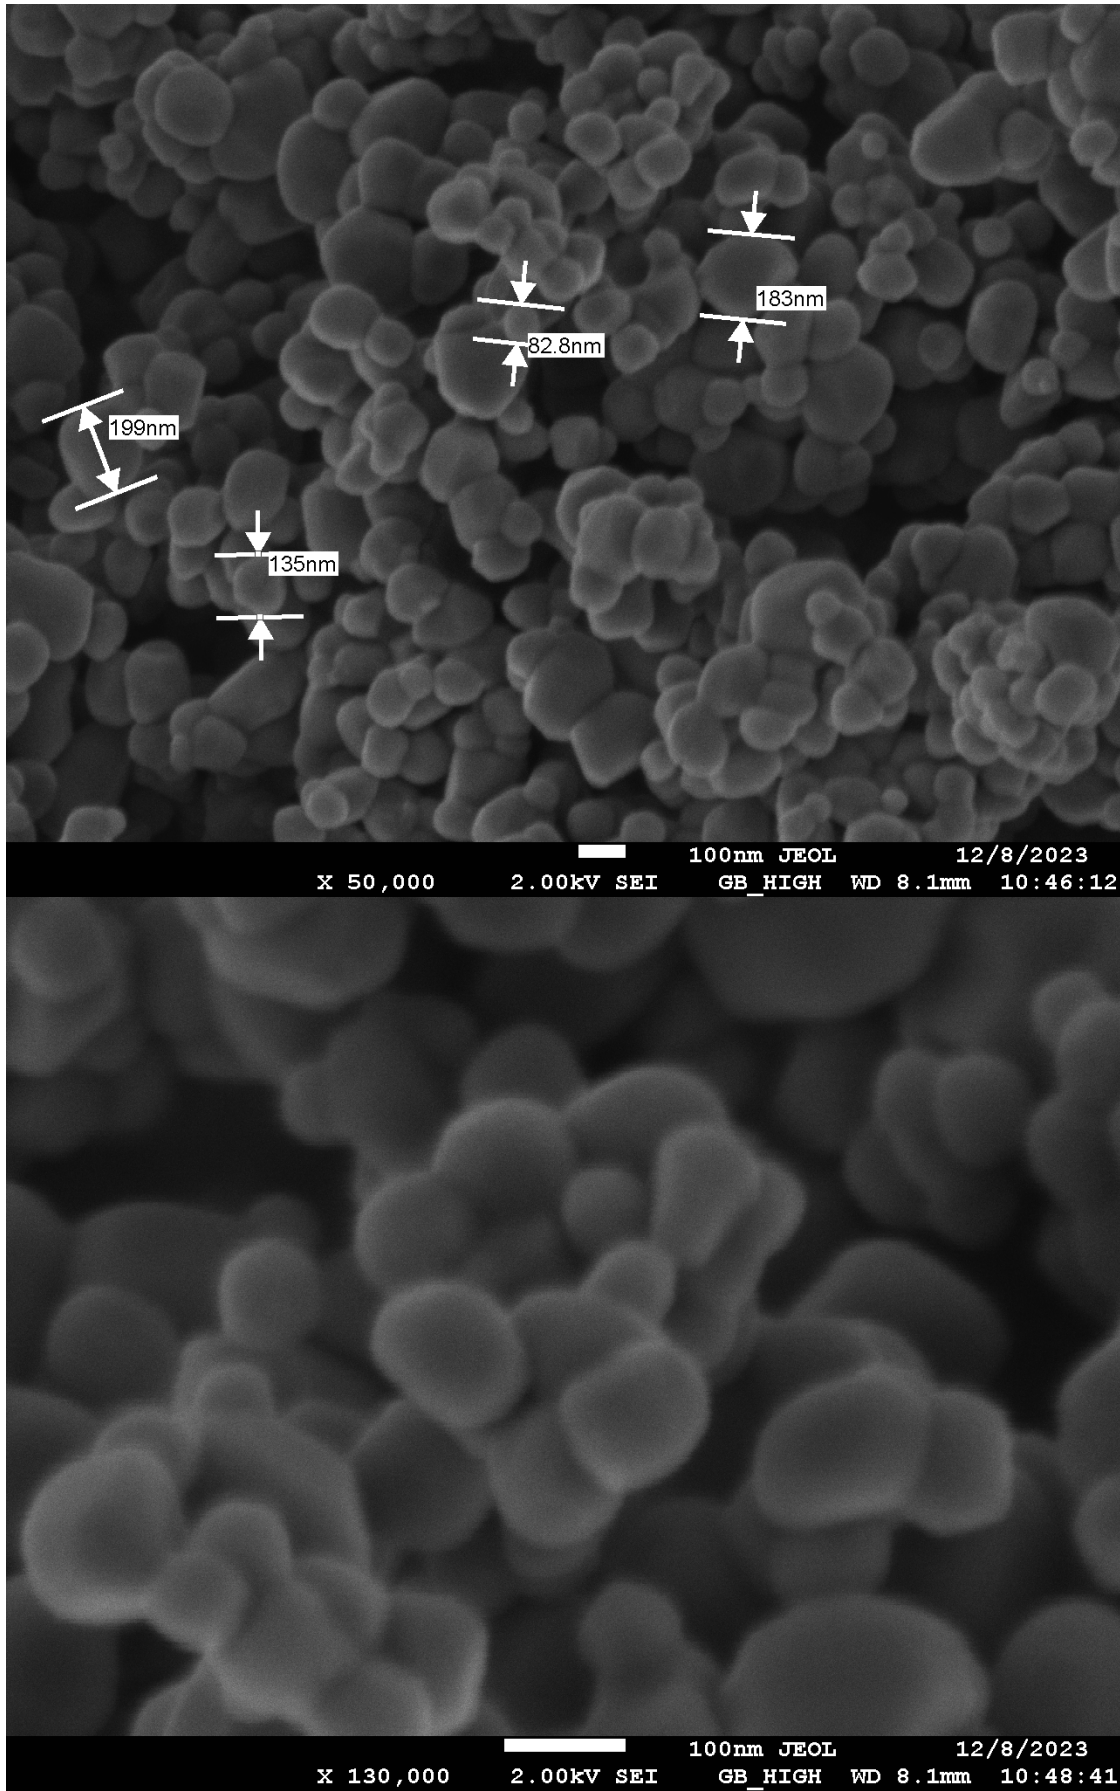

Figure S14. SEM imaging of TiO<sub>2</sub> after one use and treatment with H<sub>2</sub>O<sub>2</sub>.

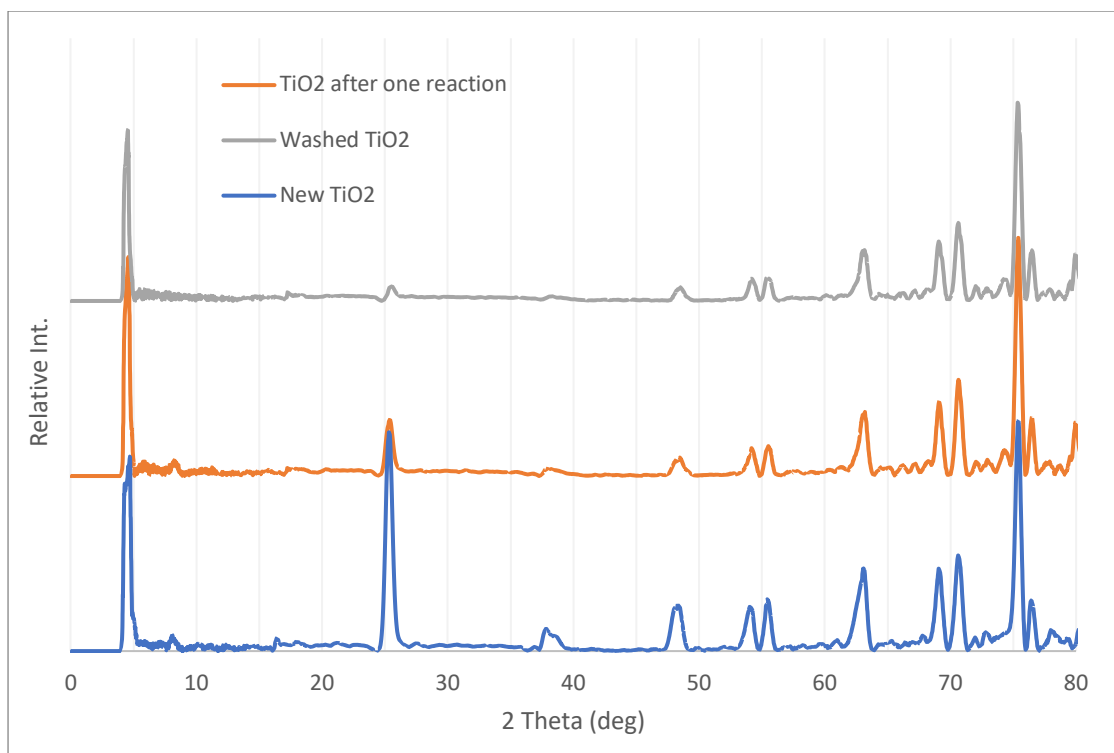

**Figure S15.** PXRD new, recycled, and washed TiO<sub>2</sub>.

**TiO<sub>2</sub> substrate (2a) surface interaction study:**

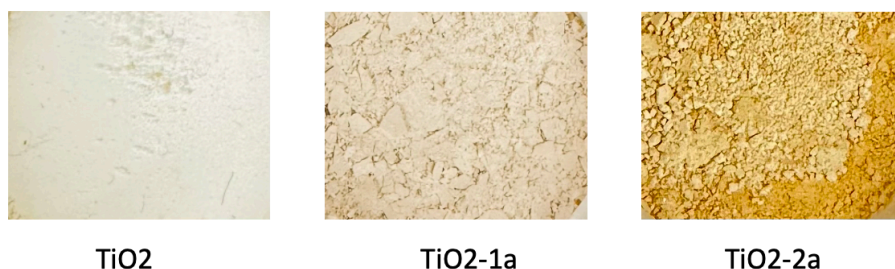

TiO<sub>2</sub>

TiO<sub>2</sub>-1a

TiO<sub>2</sub>-2a

**Figure S16.** New TiO<sub>2</sub> vs TiO<sub>2</sub>-2a mixture.

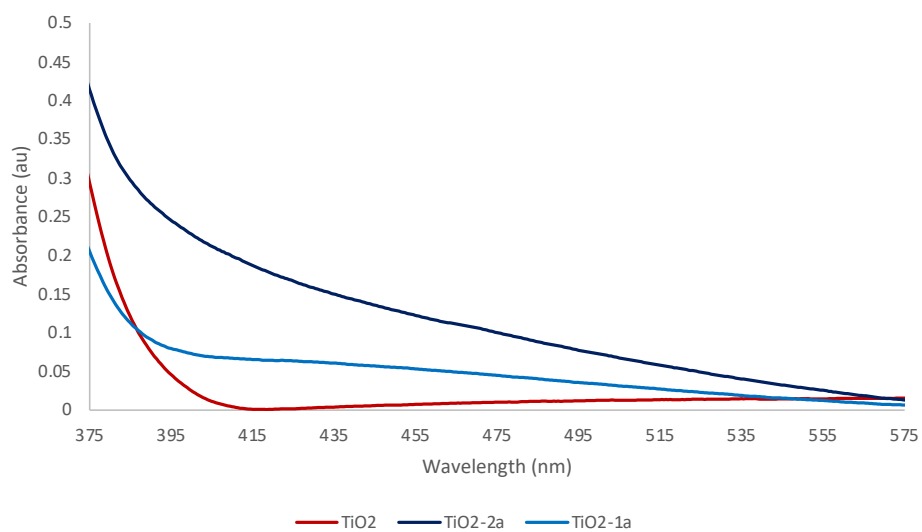

**Figure S17.** Diffuse reflectance spectroscopy (DRS) UV-Vis of new TiO<sub>2</sub>, TiO<sub>2</sub>-1a, and TiO<sub>2</sub>-2a mixture.

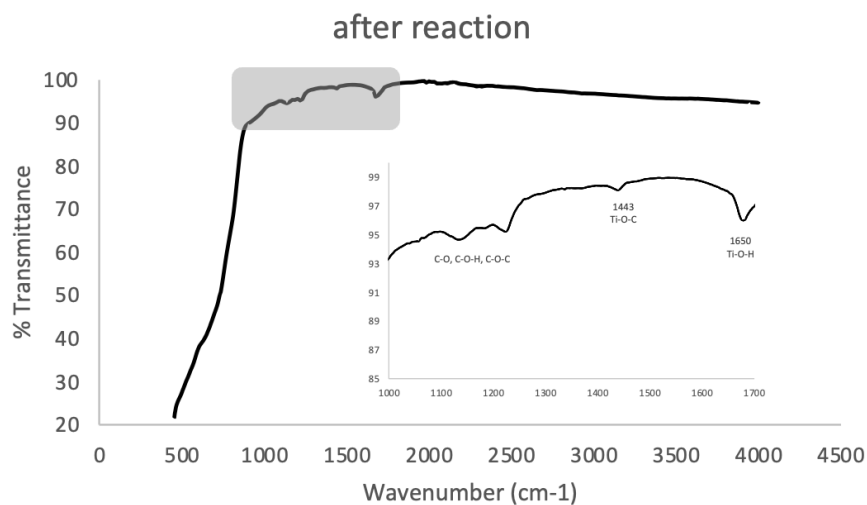

**Figure S18.** FT-IR spectrum of TiO<sub>2</sub> after reaction. The characteristic peaks centered at 1443 cm<sup>-1</sup> and 1650 cm<sup>-1</sup> were attributed to Ti-O-C bending and Ti-O-H vibrations, consistent with literature descriptions.<sup>3,4</sup>

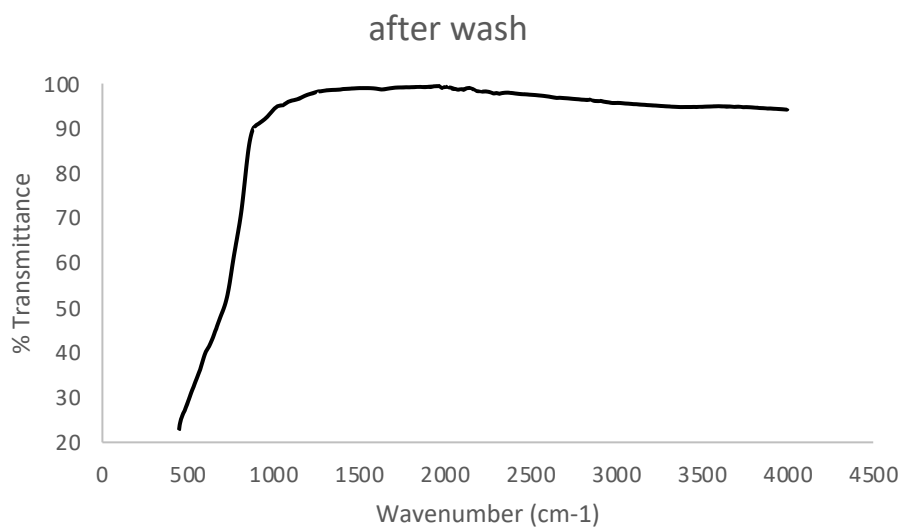

**Figure S19.** FT-IR spectrum of used TiO<sub>2</sub> after wash.

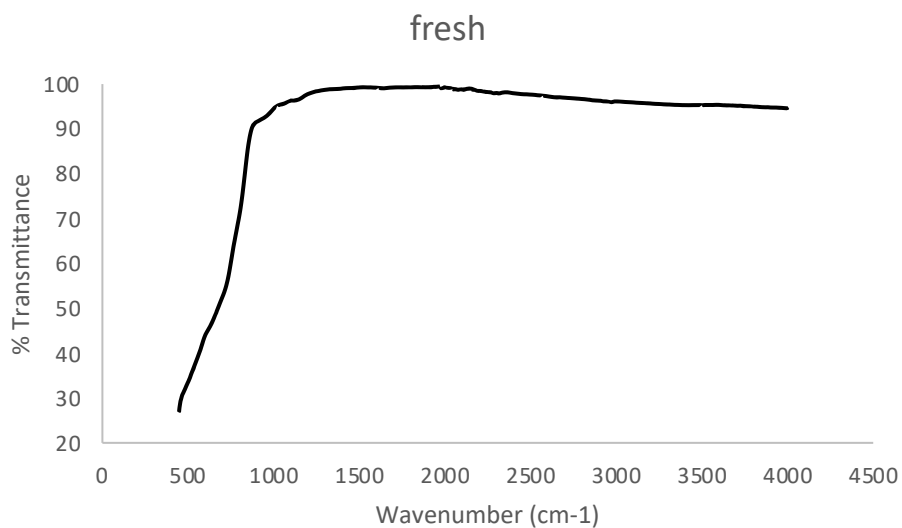

**Figure S20.** FT-IR spectrum of fresh TiO<sub>2</sub>.

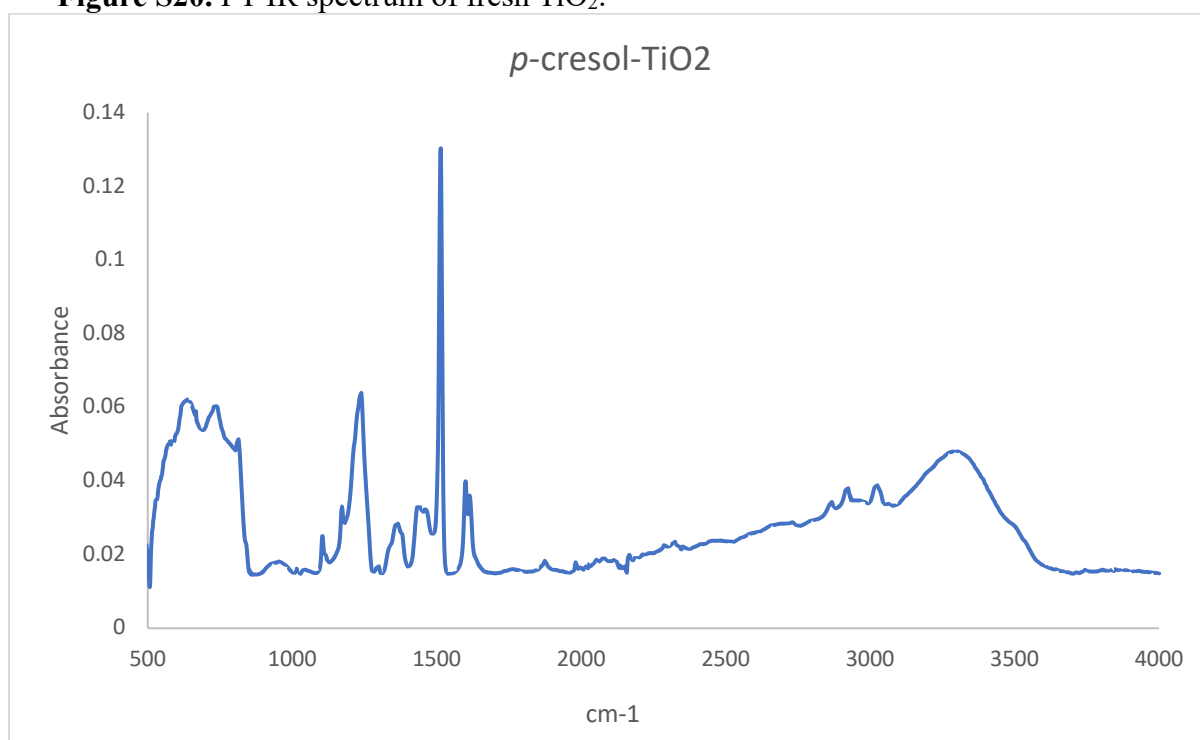

**Figure S21.** FT-IR spectrum of p-cresol(10 mol%)-TiO<sub>2</sub>.



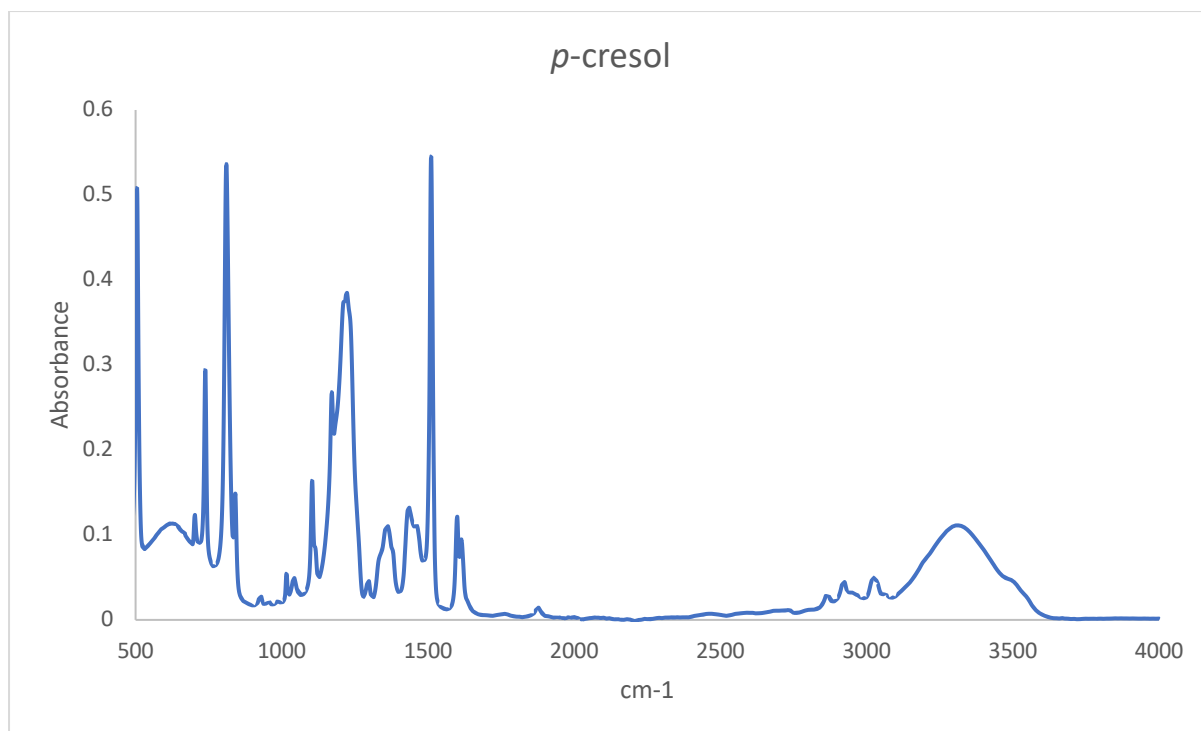

**Figure S22.** FT-IR spectrum of *p*-cresol.

### Detection of reaction intermediates using UPLCMS(ESI)

Aliquots (10  $\mu$ L) were withdrawn from the reaction flask at *x* h intervals. The aliquots were diluted to 0.001 M in MeOH (990  $\mu$ L). The sample was passed through a PTFE 0.45  $\mu$ m syringe filter to remove titanium dioxide. This solution (2  $\mu$ L) was injected into the UPLCMS for analysis.

**UPLC:** C18 column (2.1 mm x 5 cm). Flow rate = 0.5 mL/min. Mobile phase gradient: 50% MeCN/H<sub>2</sub>O with 0.1% formic acid for 0.5 min, changed to 95% MeCN/H<sub>2</sub>O with 0.1% formic acid over 2 min and held for 0.5 min, reduced to 5% MeCN/H<sub>2</sub>O with 0.1% formic acid over 5 s and held for an additional 25 s. Detection = UV-Vis (TWC).

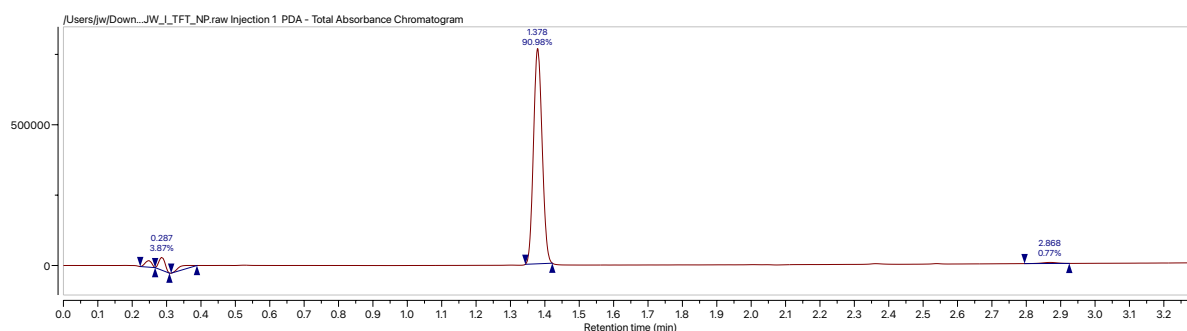

**Figure S23:** UPLC traces for TFT used in reaction.  $t_R$  (TFT) = 1.37 min



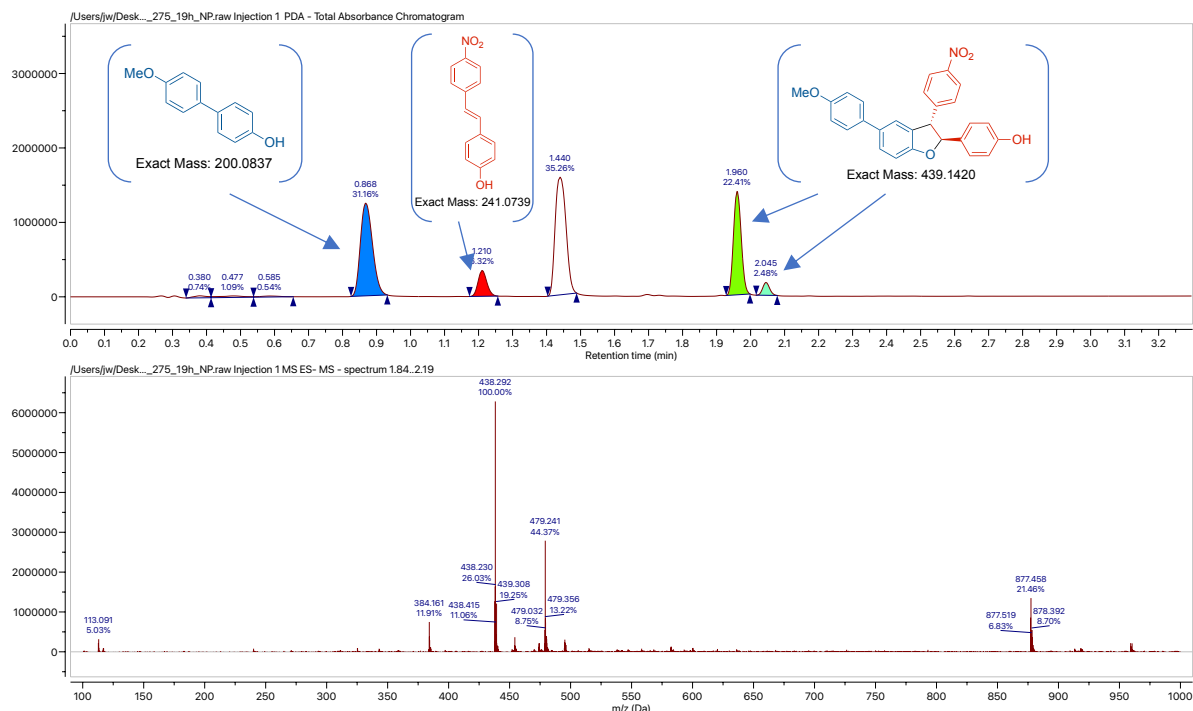

**Figure S24:** UPLCMS-ESI spectrum for the reaction of **3ig** without titanium dioxide after 19 hours.  $t_R$  (**1i**) = 0.88 min,  $t_R$  (**2g**) = 1.21 min,  $t_R$  (TFT) = 1.43 min,  $t_R$  (**3ig**) = 1.97 min. ESI-MS:  $t_R$  (**3ig**) = 1.84-2.19 min,  $m/z$  = 438.292.

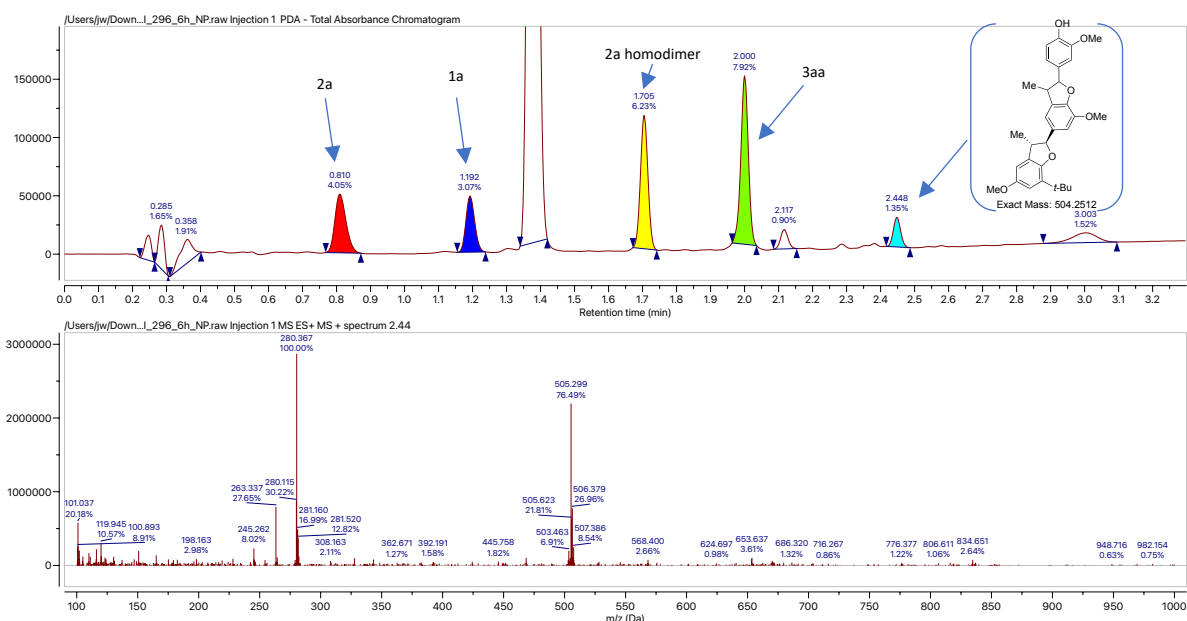

**Figure S25:** UPLCMS-ESI spectrum for the reaction of **3aa** without titanium dioxide after 6 hours.  $t_R$  (**2a**) = 0.83 min,  $t_R$  (**1a**) = 1.20 min,  $t_R$  (TFT) = 1.37 min,  $t_R$  (**2a homodimer**) = 1.70 min,  $t_R$  (**3aa**) = 2.00 min,  $t_R$  (over oxidized adduct) = 2.45 min. ESI-MS:  $t_R$  (over oxidized adduct) = 2.44 min,  $m/z$  = 505.299.

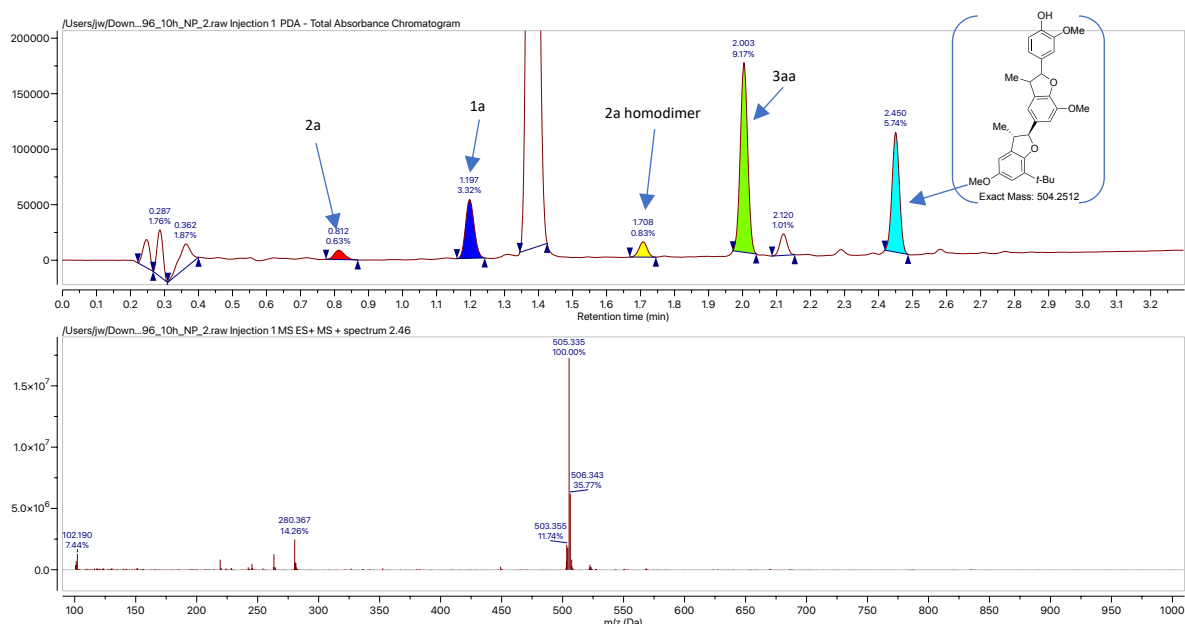

**Figure S26:** UPLCMS-ESI spectrum for the reaction of **3aa** without titanium dioxide after 10 hours.  $t_R$  (**2a**) = 0.83 min,  $t_R$  (**1a**) = 1.20 min,  $t_R$  (TFT) = 1.38 min,  $t_R$  (**2a homodimer**) = 1.70 min,  $t_R$  (**3aa**) = 2.00 min,  $t_R$  (**over oxidized adduct**) = 2.45 min. ESI<sup>+</sup>MS:  $t_R$  (**over oxidized adduct**) = 2.46 min,  $m/z$  = 505.335.

### Substrate Limitations:

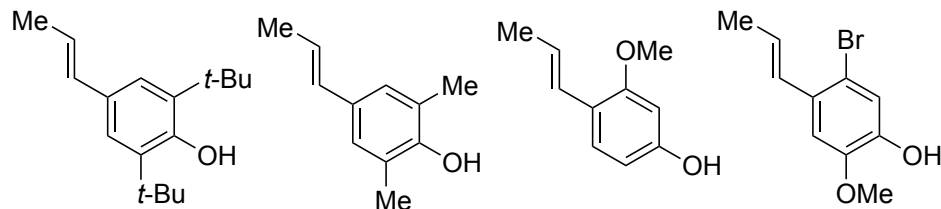

**Figure S27:** Alkenyl-phenol substrates that degraded rapidly under standard reaction conditions.

## Characterization of Alkenyl Phenol Substrates

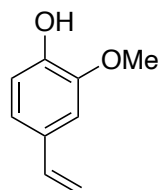

### 2-Methoxy-4-vinylphenol (2c)

General procedure A was followed using 4-hydroxy-3-methoxybenzaldehyde (1.0 g, 6.6 mmol, 1.0 equiv), *KOt*Bu (1.5 g, 13 mmol, 2.0 equiv), methyltriphenylphosphonium bromide (4.7 g, 13 mmol, 2.0 equiv), and dry THF (24 mL) for 12 h. Flash column chromatography (*n*-hexanes/*EtOAc* 95:5) afforded the product as a yellow oil (0.6 g, 3.9 mmol) in 60% isolated yield.

$^1\text{H NMR}$  (400 MHz,  $\text{CDCl}_3$ )  $\delta$  6.98 – 6.84 (m, 3H), 6.64 (dd,  $J = 17.5, 10.8$  Hz, 1H), 5.66 (s, 1H), 5.60 (dd,  $J = 17.5, 0.9$  Hz, 1H), 5.13 (dd,  $J = 10.8, 0.9$  Hz, 1H), 3.91 (s, 3H).

$^{13}\text{C}\{^1\text{H}\}$  NMR (101 MHz,  $\text{CDCl}_3$ )  $\delta$  146.7, 145.8, 136.8, 130.4, 120.2, 114.5, 111.6, 108.2, 56.0.

Spectral data in agreement with those reported in *Chem. Eur. J.* **2013**, *19*, 9807–9810.<sup>5</sup>

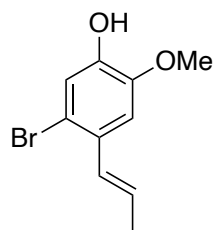

### 5-Bromo-2-methoxy-4-(prop-1-en-1-yl)phenol

General procedure A was followed using 2-bromo-4-hydroxy-5-methoxybenzaldehyde (1.0 g, 4.3 mmol, 1.0 equiv), *KOt*Bu (1.0 g, 8.6 mmol, 2.0 equiv), ethyltriphenylphosphonium bromide (3.2 g, 8.6 mmol, 2.0 equiv), and dry THF (24 mL) for 12 h. Flash column chromatography (*n*-hexanes/*EtOAc* 85:15) afforded the product as a yellow oil (2:1 *E:Z*, 0.8 g, 3.1 mmol) in 72% isolated yield.

$^1\text{H NMR}$  (400 MHz,  $\text{CDCl}_3$ ) *E*-isomer  $\delta$  7.15 (s, 1H), 6.79 (s, 1H), 6.41 (dd,  $J = 11.4, 1.8$  Hz, 1H), 5.81 (dq,  $J = 11.4, 7.1$  Hz, 1H), 5.63 (s, 1H), 3.87 (s, 3H), 1.79 (dd,  $J = 7.1, 1.8$  Hz, 3H).

$^{13}\text{C}\{^1\text{H}\}$  NMR (101 MHz,  $\text{CDCl}_3$ ) *E*-isomer  $\delta$  145.5, 145.2, 129.9, 129.5, 127.1, 118.5, 112.7, 108.5, 56.2, 14.5.

HRMS (EI-TOF)  $m/z$  241.9942 calcd for  $\text{C}_{10}\text{H}_{11}\text{BrO}_2$  [ $\text{M}$ ]<sup>+</sup>; found 241.9932.

Single Mass Analysis

Tolerance = 3.0 mDa / DBE: min = -1.5, max = 50.0  
 Element prediction: Off

Monoisotopic Mass, Odd Electron Ions

133 formula(e) evaluated with 3 results within limits (up to 50 best isotopic matches for each mass)

Elements Used:

C: 0-50 H: 0-100 N: 0-10 O: 0-10 Br: 1-1

09:35:58  
 TOF MS EI+

LIU

YL\_I\_28\_diluted 337 (10.160) Cm (337-315:323)

3.01e+004

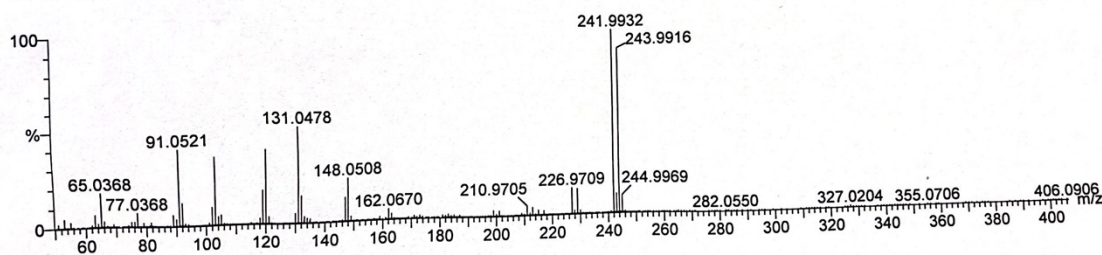

Minimum: -1.5  
 Maximum: 50.0

| Mass     | Calc. Mass | mDa  | PPM  | DBE | i-FIT | Formula         |
|----------|------------|------|------|-----|-------|-----------------|
| 241.9932 | 241.9942   | -1.0 | -4.1 | 5.0 | 65.7  | C10 H11 O2 Br   |
|          | 241.9916   | 1.6  | 6.6  | 6.0 | 98.0  | C6 H7 N6 Br     |
|          | 241.9902   | 3.0  | 12.4 | 1.0 | 306.4 | C5 H11 N2 O4 Br |

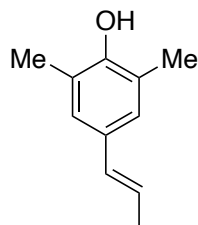

**2,6-Dimethyl-4-(prop-1-en-1-yl)phenol**

General procedure A was followed using 4-hydroxy-3,5-dimethylbenzaldehyde (3.0 g, 20 mmol, 1.0 equiv), KO<sup>t</sup>Bu (4.5 g, 40 mmol, 2.0 equiv), ethyltriphenylphosphonium bromide (14.8 g, 39.8 mmol, 2.00 equiv), and dry THF (48 mL) for 12 h. Flash column chromatography (*n*-hexanes/EtOAc 95:5) afforded the product as a yellow oil (6:1 *E:Z*, 2.7 g, 16.8 mmol) in 84% isolated yield.

<sup>1</sup>H NMR (400 MHz, CDCl<sub>3</sub>) *E*-isomer δ 6.98 (s, 2H), 6.35 (dd, *J* = 11.9, 1.9 Hz, 1H), 5.70 (dq, *J* = 11.9, 7.2 Hz, 1H), 3.51 (s, 1H), 2.28 (s, 6H), 1.93 (dt, *J* = 7.2, 1.9 Hz, 3H).

<sup>13</sup>C{<sup>1</sup>H} NMR (101 MHz, CDCl<sub>3</sub>) *E*-isomer δ 151.0, 130.6, 129.3, 126.2, 124.8, 122.9, 16.1, 14.7.

Spectral data in agreement with those reported in *Chem. Commun.* **2020**, 56, 7941-7944.<sup>6</sup>

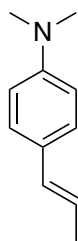

### ***N,N*-Dimethyl-4-(prop-1-en-1-yl)aniline (2f)**

General procedure A was followed using 4-(dimethylamino)benzaldehyde (2.00 g, 13.4 mmol, 1.00 equiv), KO $t$ Bu (3.0 g, 27 mmol, 2.0 equiv), ethyltriphenylphosphonium bromide (9.9 g, 27 mmol, 2.0 equiv), and dry THF (48 mL) for 12 h. Flash column chromatography (*n*-hexanes/EtOAc 85:15) afforded the product as a yellow oil (3:1 *E*:*Z*, 1.3 g, 8.1 mmol) in 60% isolated yield.

$^1\text{H}$  NMR (400 MHz, CDCl $_3$ ) *E*-isomer  $\delta$  7.28 – 7.25 (m, 2H), 6.77 – 6.73 (m, 2H), 6.35 (dd,  $J$  = 11.6, 1.9 Hz, 1H), 5.65 (dq,  $J$  = 11.6, 7.2 Hz, 1H), 2.99 (s, 6H), 1.95 (dd,  $J$  = 7.2, 1.8 Hz, 3H).

$^{13}\text{C}\{^1\text{H}\}$  NMR (101 MHz, CDCl $_3$ ) *E*-isomer  $\delta$  149.3, 130.9, 129.9, 126.8, 123.5, 112.3, 40.7, 14.9.

Spectral data in agreement with those reported in *Org. Lett.* **2020**, *22*, 1193–1198.<sup>7</sup>

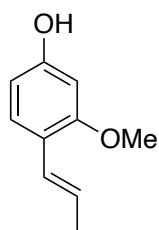

### **3-Methoxy-4-(prop-1-en-1-yl)phenol**

General procedure A was followed using 4-hydroxy-2-methoxybenzaldehyde (1.0 g, 6.6 mmol, 1.0 equiv), KO $t$ Bu (1.5 g, 13 mmol, 2.0 equiv), ethyltriphenylphosphonium bromide (4.9 g, 13 mmol, 2.0 equiv), and dry THF (48 mL) for 12 h. Flash column chromatography (*n*-hexanes/EtOAc 90:10) afforded the product as a yellow oil (8:1 *E*:*Z*, 0.9 g, 5.5 mmol) in 84% isolated yield.

$^1\text{H}$  NMR (400 MHz, CDCl $_3$ ) *E*-isomer  $\delta$  7.12 (d,  $J$  = 8.1, 1H), 6.49 – 6.36 (m, 3H), 5.77 (dq,  $J$  = 11.5, 8.1, 7.0 Hz, 1H), 5.06 (s, 1H), 3.80 (s, 3H), 1.81 (dd,  $J$  = 7.0 Hz, 3H).

$^{13}\text{C}\{^1\text{H}\}$  NMR (101 MHz, CDCl $_3$ ) *E*-isomer  $\delta$  158.3, 155.8, 130.8, 125.9, 124.8, 119.2, 106.5, 99.0, 55.6, 14.7.

HRMS (ESI-TOF)  $m/z$  165.0916 calcd for C $_{10}$ H $_{13}$ O $_2$  [M + H] $^+$ ; found 165.0918.

### Sample Mass Analysis

Mass tolerance = 3.0 mDa / DBE: min = -1.5, max = 50.0  
 Element prediction: Off  
 Number of isotope peaks used for i-FIT = 3

#### Monoisotopic Mass, Even Electron Ions

133 formula(e) evaluated with 2 results within limits (up to 50 best isotopic matches for each mass)

Elements Used:

C: 8-40 H: 9-80 N: 0-10 O: 0-10 Na: 0-1

05-Sep-2023 07:27:28

YL\_L\_38 8 (0.372)

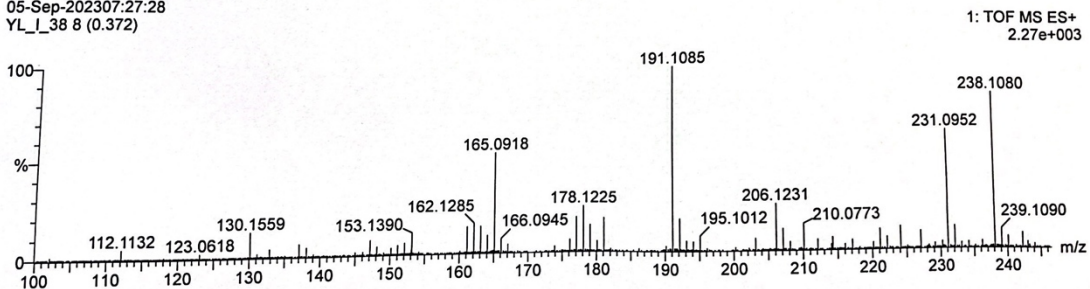

| Mass     | Calc. Mass | mDa | PPM  | DBE | i-FIT | i-FIT (Norm) | Formula      |
|----------|------------|-----|------|-----|-------|--------------|--------------|
| 165.0918 | 165.0916   | 0.2 | 1.2  | 4.5 | 79.1  | 0.5          | C10 H13 O2   |
|          | 165.0891   | 2.7 | 16.4 | 1.5 | 79.5  | 0.9          | C8 H14 O2 Na |

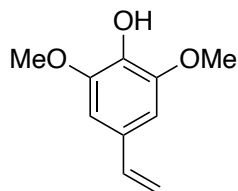

## 2,6-Dimethoxy-4-vinylphenol (2d)

General procedure A was followed using 2,6-dimethoxy-4-vinylphenol (2.0 g, 11 mmol, 1.0 equiv), *KOtBu* (2.5 g, 22 mmol, 2.0 equiv), methyltriphenylphosphonium bromide (7.9 g, 11 mmol, 2.0 equiv), and dry THF (24 mL) for 12 h. Flash column chromatography (*n*-hexanes/*EtOAc* 80:20) afforded the product as a clear oil (1.0 g, 5.8 mmol) in 53% isolated yield.

$^1\text{H NMR}$  (400 MHz,  $\text{CDCl}_3$ )  $\delta$  6.60 (s, 2H), 6.56 (dd,  $J = 17.5, 10.9$ , 1H), 5.67 (s, 1H), 5.58 (d,  $J = 17.5$ , 1H), 5.10 (d,  $J = 10.9$  Hz, 1H), 3.82 (s, 6H).

$^{13}\text{C}\{^1\text{H}\}$  NMR (101 MHz,  $\text{CDCl}_3$ )  $\delta$  147.0, 136.7, 134.8, 129.0, 111.5, 103.0, 56.0.

Spectral data in agreement with those reported in *Eur. Polym. J.* **2020**, *125*, 109534.<sup>8</sup>

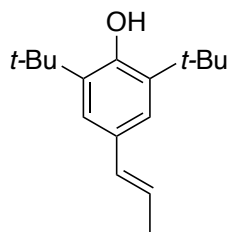

### 2,6-Di-*tert*-butyl-4-(prop-1-en-1-yl)phenol

General procedure A was followed using 3,5-di-*tert*-butyl-4-hydroxybenzaldehyde (2.0 g, 8.5 mmol, 1.0 equiv), KO*t*Bu (1.9 g, 17 mmol, 2.0 equiv), ethyltriphenylphosphonium bromide (6.3 g, 17 mmol, 2.0 equiv), and dry THF (24 mL) for 12 h. Flash column chromatography (*n*-hexanes/EtOAc 100:0) afforded the product as a yellow oil (4:1 *E*:*Z*, 1.4 g, 5.7 mmol) in 67% isolated yield.

**<sup>1</sup>H NMR (400 MHz, CDCl<sub>3</sub>) *E*-isomer** δ 7.18 (s, 2H), 6.40 (dq, *J* = 11.6, 1.9 Hz, 1H), 5.69 (dd, *J* = 11.6, 7.1 Hz, 1H), 5.20 (s, 1H), 1.95 (dd, *J* = 7.2, 1.9 Hz, 3H), 1.48 (s, 18H).

**<sup>13</sup>C{<sup>1</sup>H} NMR (101 MHz, CDCl<sub>3</sub>) *E*-isomer** δ 152.6, 135.6, 130.5, 129.0, 125.8, 124.3, 34.5, 30.5, 14.9.

Spectral data in agreement with those reported in *Chem. Commun.* **2020**, 56, 7941-7944.<sup>2</sup>

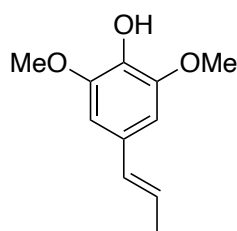

### 2,6-Dimethoxy-4-(prop-1-en-1-yl)phenol (2b)

General procedure A was followed using 4-hydroxy-3,5-dimethoxybenzaldehyde (1.0 g, 5.5 mmol, 1.0 equiv), KO*t*Bu (1.2 g, 11 mmol, 2.0 equiv), ethyltriphenylphosphonium bromide (4.0 g, 11 mmol, 2.0 equiv), and dry THF (24 mL) for 12 h. Flash column chromatography (*n*-hexanes/EtOAc 85:15) afforded product as a yellow oil (>20:1 *E*:*Z*, 0.6 g, 2.9 mmol) in 53% isolated yield.

**<sup>1</sup>H NMR (400 MHz, CDCl<sub>3</sub>) *E*-isomer** δ 6.52 (s, 2H), 6.33 (dq, *J* = 11.6, 1.9 Hz, 1H), 5.68 (dq, *J* = 11.5, 7.2 Hz, 1H), 5.58 (s, 1H), 3.85 (s, 6H), 1.89 (dd, *J* = 7.2, 1.9 Hz, 3H).

**<sup>13</sup>C{<sup>1</sup>H} NMR (101 MHz, CDCl<sub>3</sub>) *E*-isomer** δ 146.7, 133.6, 129.9, 128.9, 125.3, 105.8, 56.2, 14.6.

Spectral data in agreement with those reported in *Angew. Chem. Int. Ed.* **2020**, 59, 21930–21934.<sup>9</sup>

## Characterization of products:

Unless stated in the substrate preparation section, all starting materials were obtained from commercially available sources.

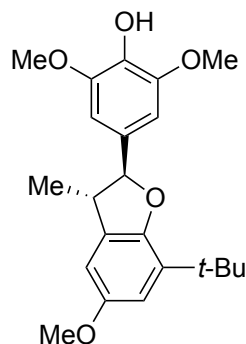

### (±)-4-((2*S*,3*S*)-7-(*tert*-Butyl)-5-methoxy-3-methyl-2,3-dihydrobenzofuran-2-yl)-2,6-dimethoxyphenol (**3ab**)

General procedure C was followed using 2,6-dimethoxy-4-(prop-1-en-1-yl)phenol (**2b**) (0.56 mmol, 1.00 equiv), 2-*tert*-butyl-4-methoxyphenol (1.12 mmol, 2.00 equiv), TiO<sub>2</sub> (5.60 mmol, 10.0 equiv) and HFIP/TFT 1:1 mixture (4.00 mL, 0.14 M) for 7 h. General procedure D was used followed by flash column chromatography (*n*-hexane/EtOAc 85:15) to afford an orange oil (>20:1 dr, 0.15 g, 0.40 mmol) in 71% isolated yield.

<sup>1</sup>H NMR (400 MHz, CDCl<sub>3</sub>) δ 6.75 (dd, *J* = 2.7, 0.8 Hz, 1H), 6.68 (s, 2H), 6.58 (dd, *J* = 2.7, 1.0 Hz, 1H), 5.58 (s, 1H), 5.07 (d, *J* = 9.0 Hz, 1H), 3.89 (s, 6H), 3.80 (s, 3H), 3.35 – 3.30 (quintet, *J* = 7.4 Hz, 1H), 1.42 (d, *J* = 6.8 Hz, 3H), 1.41 (s, 9H).

<sup>13</sup>C{<sup>1</sup>H} NMR (101 MHz, CDCl<sub>3</sub>) δ 154.2, 151.1, 147.2, 134.5, 133.7, 133.0, 132.7, 111.7, 106.3, 102.7, 92.2, 56.4, 56.0, 46.2, 34.4, 29.3, 18.1.

HRMS (ESI-TOF) *m/z* 373.2005 calcd for C<sub>22</sub>H<sub>29</sub>O<sub>5</sub> [M + H]<sup>+</sup>; found 373.2015.



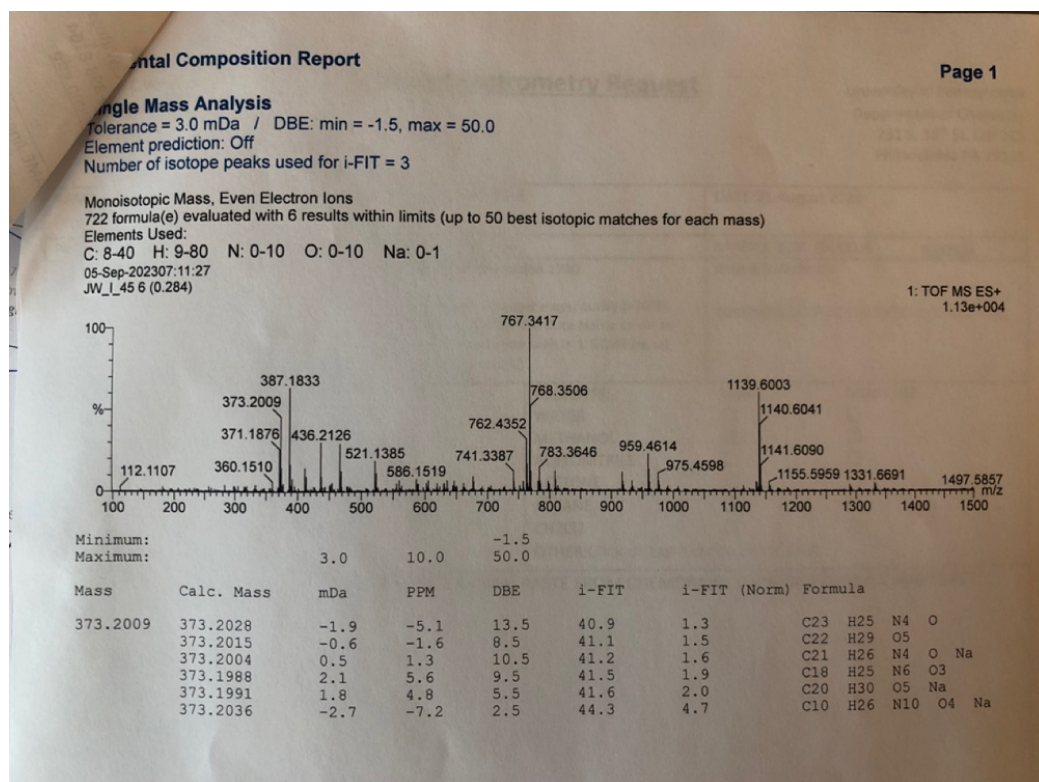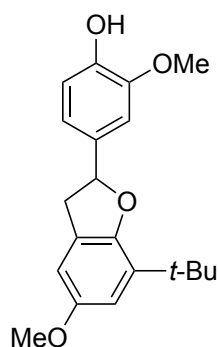

#### 4-(7-(*tert*-Butyl)-5-methoxy-2,3-dihydrobenzofuran-2-yl)-2-methoxyphenol (**3ac**)

General procedure C was followed using 2-methoxy-4-vinylphenol (**2g**) (0.56 mmol, 1.00 equiv), 2-*tert*-butyl-4-methoxyphenol (1.12 mmol, 2.00 equiv), TiO<sub>2</sub> (5.60 mmol, 10.0 equiv) and HFIP/TFT mixture (4.00 mL, 0.14 M) for 6 h. General procedure D was used followed by flash column chromatography (*n*-hexane/EtOAc 8.5:1.5) to afford a yellow oil (>20:1 dr 0.03 g, 0.10 mmol) in 17% isolated yield.

<sup>1</sup>H NMR (400 MHz, CDCl<sub>3</sub>) δ 6.98 – 6.87 (m, 3H), 6.72 (d, *J* = 2.6 Hz, 1H), 6.64 (d, *J* = 2.6 Hz, 1H), 5.69 (dd, *J* = 9.4, 8.4 Hz, 1H), 5.62 (s, 1H), 3.86 (s, 3H), 3.79 (s, 3H), 3.55 (ddt, *J* = 15.6, 9.5, 0.9 Hz, 1H), 3.12 (ddt, *J* = 15.5, 8.4, 1.0 Hz, 1H), 1.40 (s, 9H).

<sup>13</sup>C{<sup>1</sup>H} NMR (101 MHz, CDCl<sub>3</sub>) δ 154.0, 151.7, 146.7, 145.3, 135.1, 133.6, 127.5, 118.8, 114.4, 111.8, 108.3, 107.4, 83.6, 56.1, 56.0, 39.3, 34.4, 29.4.

#### HRMS

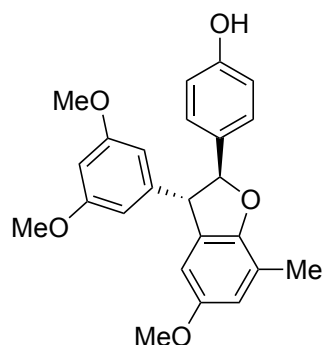

**(±)-4-(3-(3,5-Dimethoxyphenyl)-5-methoxy-7-methyl-2,3-dihydrobenzofuran-2-yl)phenol (3ce)**

General procedure C was followed using pterostilbene (**2i**) (0.56 mmol, 1.00 equiv), 4-methoxy-2-methylphenol (1.12 mmol, 2.00 equiv), TiO<sub>2</sub> (5.60 mmol, 10.0 equiv) and HFIP/TFT 1:1 mixture (4.00 mL, 0.14 M) for 24 h. General procedure D was used followed by flash column chromatography (*n*-hexane/EtOAc 85:15) to afford a beige oil (>20:1 dr, 0.13 g, 0.33 mmol) in 59% isolated yield.

<sup>1</sup>H NMR (400 MHz, CDCl<sub>3</sub>) δ 7.22 (d, *J* = 8.5 Hz, 2H), 6.79 (d, *J* = 8.6 Hz, 2H), 6.64 (d, *J* = 2.5 Hz, 1H), 6.43 (d, *J* = 2.4 Hz, 1H), 6.40 (t, *J* = 2.3 Hz, 1H), 6.34 (d, *J* = 2.3 Hz, 2H), 5.44 (d, *J* = 8.6 Hz, 1H), 4.45 (d, *J* = 8.7 Hz, 1H), 3.75 (s, 6H), 3.72 (s, 3H), 2.30 (s, 3H).

<sup>13</sup>C{<sup>1</sup>H} NMR (101 MHz, CDCl<sub>3</sub>) δ 161.1, 155.8, 154.5, 152.6, 144.1, 133.0, 129.8, 127.8, 120.3, 116.0, 115.5, 108.1, 106.6, 99.1, 92.4, 58.9, 56.2, 55.5, 15.7.

**HRMS (ESI-TOF) *m/z* 393.1702 calcd for C<sub>24</sub>H<sub>25</sub>O<sub>5</sub> [M + H]<sup>+</sup>; found 393.1728.**

**Elemental Composition Report**

Page 1

**Single Mass Analysis**

Tolerance = 3.0 mDa / DBE: min = -1.5, max = 50.0  
 Element prediction: Off  
 Number of isotope peaks used for i-FIT = 3

**Monoisotopic Mass, Even Electron Ions**

253 formula(e) evaluated with 2 results within limits (up to 50 best isotopic matches for each mass)

Elements Used:

C: 8-40 H: 9-80 N: 0-5 O: 3-8 Na: 0-1

30-Aug-2023 08:31:22

JW\_LPTER\_BHA 15 (0.726)

1: TOF MS ES+  
8.33e+003

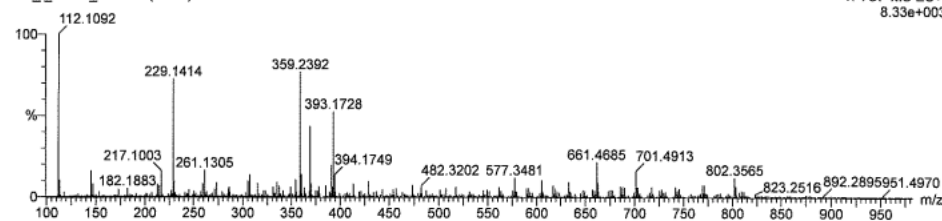

Minimum: -1.5

Maximum: 3.0 10.0 50.0

| Mass     | Calc. Mass | mDa  | PPM  | DBE  | i-FIT | i-FIT (Norm) | Formula          |
|----------|------------|------|------|------|-------|--------------|------------------|
| 393.1728 | 393.1702   | 2.6  | 6.6  | 12.5 | 38.8  | 0.0          | C24 H25 O5       |
|          | 393.1750   | -2.2 | -5.6 | 5.5  | 42.5  | 3.8          | C16 H26 N4 O6 Na |

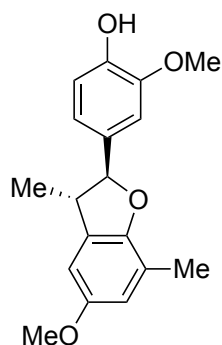

**(±)-2-Methoxy-4-(5-methoxy-3,7-dimethyl-2,3-dihydrobenzofuran-2-yl)phenol (3ca)**

General procedure C was followed using *iso*-eugenol (**2a**) (0.56 mmol, 1.00 equiv), 4-methoxy-2-methylphenol (1.12 mmol, 2.00 equiv), TiO<sub>2</sub> (5.60 mmol, 10.0 equiv) and HFIP/TFT 1:1 mixture (4.00 mL, 0.14 M) for 6 h. General procedure D was used followed by flash column chromatography (*n*-hexane/EtOAc 85:15) to afford a beige oil (>20:1 dr, 0.10 g, 0.32 mmol) in 57% isolated yield.

<sup>1</sup>H NMR (400 MHz, CDCl<sub>3</sub>) δ 6.99 (t, *J* = 1.1 Hz, 1H), 6.92 (m, 2H), 6.57 (m, 2H), 5.03 (d, *J* = 9.4 Hz, 1H), 3.90 (s, 3H), 3.78 (s, 3H), 3.41 (m, 1H), 2.24 (s, 3H), 1.37 (d, *J* = 6.8 Hz, 3H).

<sup>13</sup>C{<sup>1</sup>H} NMR 101 MHz, CDCl<sub>3</sub>) δ 154.3, 151.7, 146.7, 145.7, 132.7, 132.2, 120.0, 119.8, 114.6, 114.2, 108.7, 107.1, 92.7, 56.1, 56.0, 46.1, 17.4, 15.5.

HRMS (ESI-TOF) *m/z* 301.1416 calcd for C<sub>18</sub>H<sub>21</sub>O<sub>4</sub> [M + H]<sup>+</sup>; found 301.1445.

**Elemental Composition Report**

Page 1

**Single Mass Analysis**

Tolerance = 3.0 mDa / DBE: min = -1.5, max = 50.0

Element prediction: Off

Number of isotope peaks used for i-FIT = 3

**Monoisotopic Mass, Even Electron Ions**

172 formula(e) evaluated with 2 results within limits (up to 50 best isotopic matches for each mass)

Elements Used:

C: 8-40 H: 9-80 N: 0-5 O: 3-8 Na: 0-1

30-Aug-2023 08:39:04

JW\_I\_143 13 (0.639) Cm (10:18)

1: TOF MS ES+  
1.52e+005

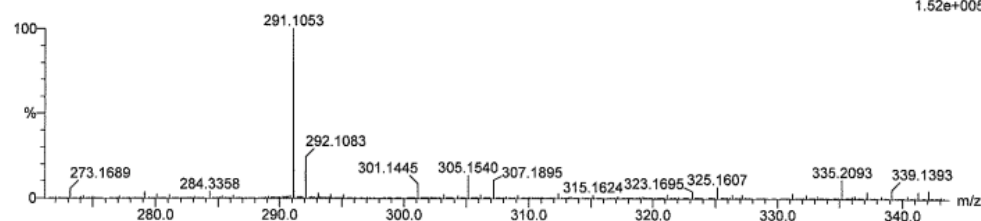

Minimum: -1.5  
Maximum: 3.0 10.0 50.0

| Mass     | Calc. Mass | mDa | PPM | DBE | i-FIT | i-FIT (Norm) | Formula       |
|----------|------------|-----|-----|-----|-------|--------------|---------------|
| 301.1445 | 301.1416   | 2.9 | 9.6 | 5.5 | 228.1 | 0.6          | C16 H22 O4 Na |
|          | 301.1440   | 0.5 | 1.7 | 8.5 | 228.2 | 0.8          | C18 H21 O4    |

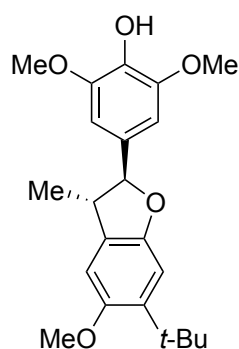

**(±)-4-(-6-(*tert*-Butyl)-5-methoxy-3-methyl-2,3-dihydrobenzofuran-2-yl)-2,6-dimethoxyphenol (3bb)**

General procedure C was followed using 2,6-dimethoxy-4-(prop-1-en-1-yl)phenol (**2b**) (0.56 mmol, 1.00 equiv), 3-(*tert*-butyl)4-methoxyphenol (1.10 mmol, 2.00 equiv), TiO<sub>2</sub> (5.60 mmol, 10.0 equiv) and HFIP/TFT 1:1 mixture (4.00 mL, 0.14 M) for 12 h. General procedure D was used followed by flash column chromatography (*n*-hexane/EtOAc 85:15) to afford a beige yellow oil (>20:1 dr, 0.09 g, 0.24 mmol) in 43% isolated yield.

<sup>1</sup>H NMR (400 MHz, CDCl<sub>3</sub>) δ 6.87 (s, 1H), 6.72 (s, 1H), 6.69 (s, 2H), 5.02 (d, *J* = 9.6 Hz, 1H), 3.90 (s, 6H), 3.84 (s, 3H), 3.43 (quintet, *J* = 8.3 Hz, 1H), 1.41 (d, *J* = 6.8 Hz, 3H), 1.38 (s, 9H).

<sup>13</sup>C{<sup>1</sup>H} NMR (101 MHz, CDCl<sub>3</sub>) δ 153.6, 152.8, 147.2, 138.7, 134.8, 131.8, 129.2, 108.1, 108.0, 103.2, 93.4, 56.5, 56.1, 46.1, 35.1, 29.9, 17.4.

**HRMS (ESI-TOF)** *m/z* 373.2015 calcd for C<sub>22</sub>H<sub>29</sub>O<sub>5</sub> [M + H]<sup>+</sup>; found 373.2032.

**Elemental Composition Report**

Page 1

**Single Mass Analysis**

Tolerance = 3.0 mDa / DBE: min = -1.5, max = 50.0

Element prediction: Off

Number of isotope peaks used for i-FIT = 3

Monoisotopic Mass, Even Electron Ions

241 formula(e) evaluated with 1 results within limits (up to 50 best isotopic matches for each mass)

Elements Used:

C: 8-40 H: 9-80 N: 0-5 O: 3-8 Na: 0-1

30-Aug-2023 08:35:24

JW\_1\_155 12 (0.596)

1: TOF MS ES+  
5.36e+004

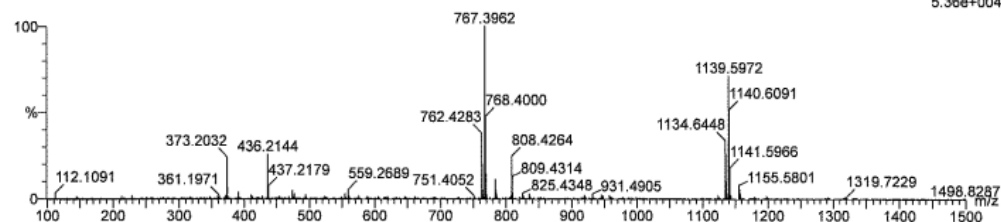

Minimum:

Maximum: 3.0 10.0 -1.5

50.0

| Mass     | Calc. Mass | mDa | PPM | DBE | i-FIT | i-FIT (Norm) | Formula    |
|----------|------------|-----|-----|-----|-------|--------------|------------|
| 373.2032 | 373.2015   | 1.7 | 4.6 | 8.5 | 62.5  | 0.0          | C22 H29 O5 |

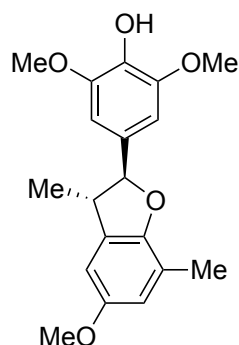

**(±)-2,6-Dimethoxy-4-(5-methoxy-3,7-dimethyl-2,3-dihydrobenzofuran-2-yl)phenol (3cb)**

General procedure C was followed using 2,6-dimethoxy-4-(prop-1-en-1-yl)phenol (**2b**) (0.56 mmol, 1.00 equiv), 2-methyl-4-methoxyphenol (1.12 mmol, 2.00 equiv), TiO<sub>2</sub> (5.60 mmol, 10.0 equiv) and HFIP/TFT 1:1 mixture (4.00 mL, 0.14 M) for 12 h. General procedure D was used followed by flash column chromatography (*n*-hexane/EtOAc 85:15) to afford a beige yellow oil (>20:1 dr, 0.11 g, 0.34 mmol) in 60% isolated yield.

<sup>1</sup>H NMR (600 MHz, CDCl<sub>3</sub>) δ 6.68 (s, 2H), 6.57 (s, 1H), 6.56 (s, 1H), 5.54 (s, 1H), 5.00 (d, *J* = 9.5 Hz, 1H), 3.90 (s, 6H), 3.77 (s, 3H), 3.41 (quintet, *J* = 8.2 Hz, 1H), 1.37 (d, *J* = 6.8 Hz, 3H).

<sup>13</sup>C{<sup>1</sup>H} NMR (151 MHz, CDCl<sub>3</sub>) δ 154.5, 151.7, 147.2, 134.9, 132.2, 131.9, 120.1, 114.8, 107.1, 103.4, 93.1, 56.5, 56.2, 46.3, 17.6, 15.7.

HRMS (ESI-TOF) *m/z* 331.1551 calcd for C<sub>19</sub>H<sub>23</sub>O<sub>5</sub> [M + H]<sup>+</sup>; found 331.1545.

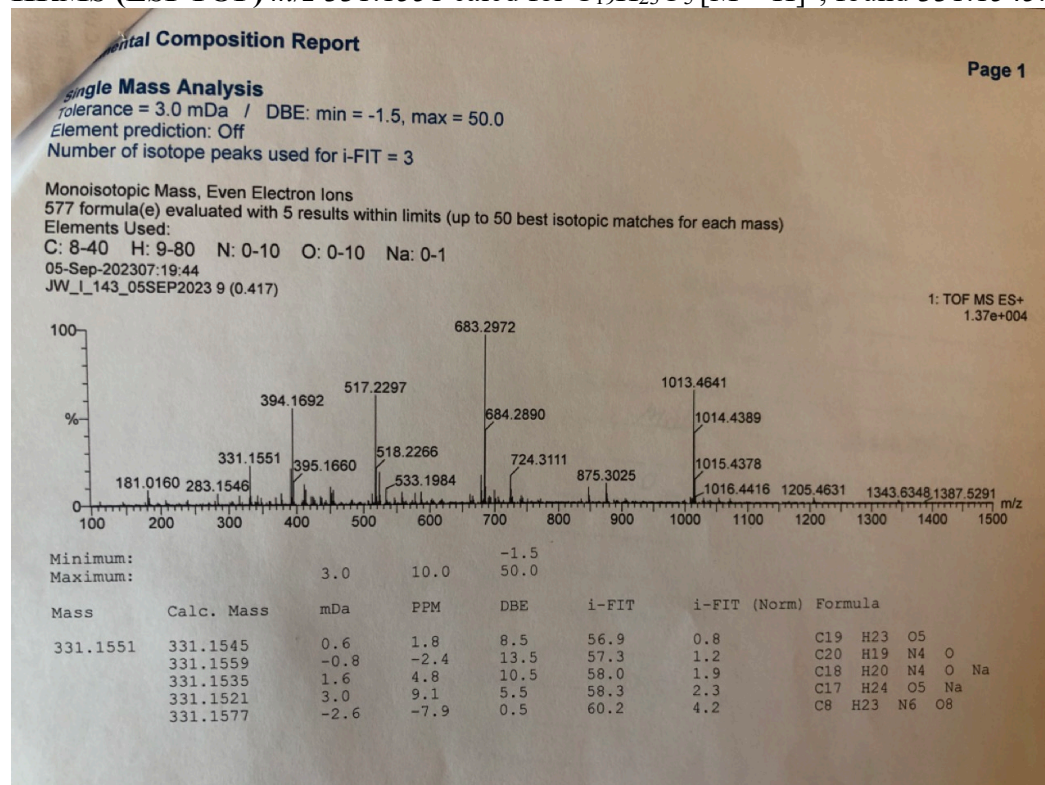



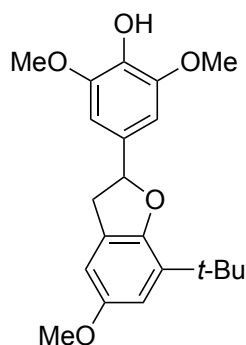

**(±)-4-(7-(*tert*-Butyl)-5-methoxy-2,3-dihydrobenzofuran-2-yl)-2,6-dimethoxyphenol (3ad)**

General procedure C was followed using 2,6-dimethoxy-4-vinylphenol (**2f**) (0.56 mmol, 1.00 equiv), 2-*tert*-butyl-4-methoxyphenol (1.12 mmol, 2.00 equiv), TiO<sub>2</sub> (5.60 mmol, 10.0 equiv) and HFIP/TFT 1:1 mixture (4.00 mL, 0.14 M) for 7 h. General procedure B was used followed by flash column chromatography (*n*-hexane/EtOAc 85:15) to afford a beige yellow oil (0.08 g, 0.21 mmol) in 37% isolated yield.

<sup>1</sup>H NMR (400 MHz, CDCl<sub>3</sub>) δ 6.71 (d, *J* = 2.6 Hz, 1H), 6.63 (d, *J* = 2.6 Hz, 1H), 6.62 (s, 2H), 5.68 (dd, *J* = 9.5, 8.1 Hz, 1H), 5.47 (s, 1H), 3.86 (s, 6H), 3.77 (s, 3H), 3.56 (ddt, *J* = 15.5, 9.5, 0.9 Hz, 1H), 3.10 (ddt, *J* = 15.5, 8.1, 1.0 Hz, 1H), 1.40 (s, 9H).

<sup>13</sup>C{<sup>1</sup>H} NMR (101 MHz, CDCl<sub>3</sub>) δ 154.1, 151.7, 147.2, 134.4, 134.3, 133.6, 127.3, 111.8, 107.5, 102.4, 83.8, 56.4, 56.1, 39.5, 34.4, 29.4.

HRMS (ESI-TOF) *m/z* 359.1860 calcd for C<sub>21</sub>H<sub>27</sub>O<sub>5</sub> [M + H]<sup>+</sup>; found 359.1858.

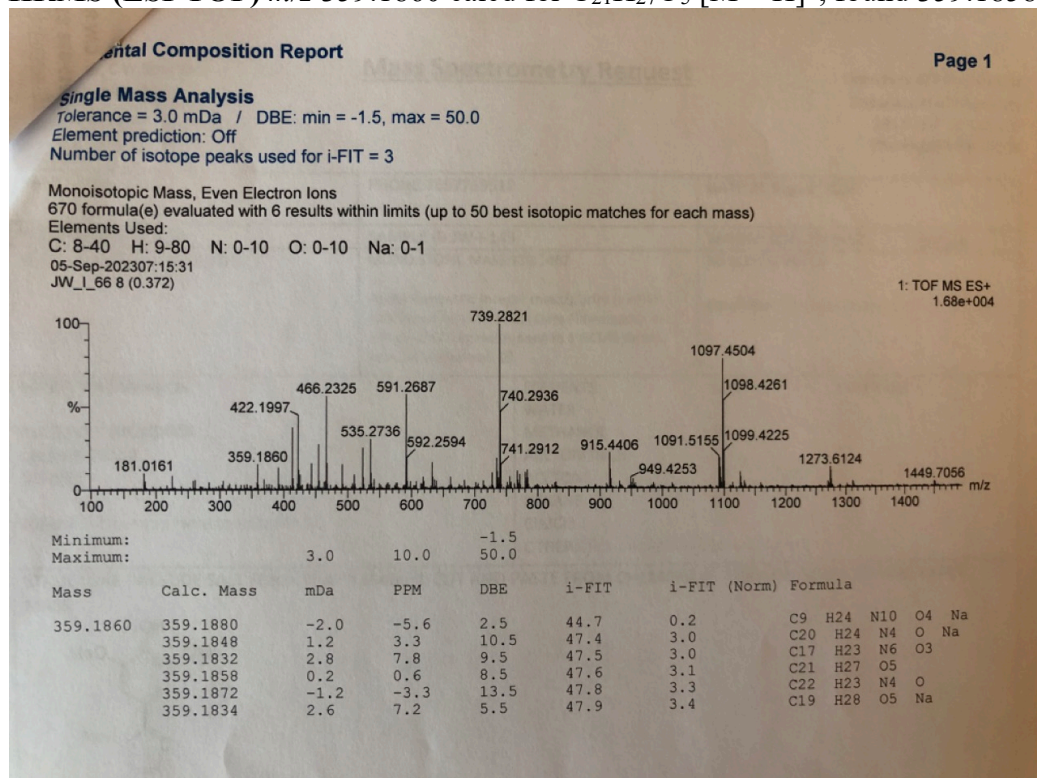

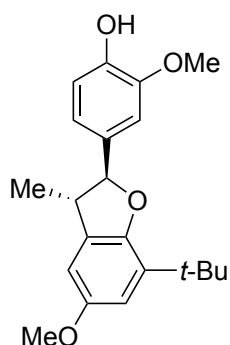

**(±)-4-(7-(*tert*-Butyl)-5-methoxy-3-methyl-2,3-dihydrobenzofuran-2-yl)-2-methoxyphenol (3aa)**

General procedure C was followed using *iso*-eugenol (**2a**) (0.56 mmol, 1.00 equiv), 2-*tert*-butyl-4-methoxyphenol (1.12 mmol, 2.00 equiv), TiO<sub>2</sub> (5.60 mmol, 10.0 equiv) and HFIP/TFT 1:1 mixture (4.00 mL, 0.14 M) for 6 h. General procedure B was used followed by flash column chromatography (*n*-hexane/EtOAc 85:15) to afford a beige yellow oil (>20:1 dr, 0.13 g, 0.37 mmol) in 66% isolated yield.

For 1g scale reaction: general procedure C was followed using *iso*-eugenol (**2a**) (5.60 mmol, 1.00 equiv), 2-*tert*-butyl-4-methoxyphenol (11.2 mmol, 2.00 equiv), TiO<sub>2</sub> (56.0 mmol, 10.0 equiv) and HFIP/TFT 1:1 mixture (43 mL, 0.14 M) for 16 h. General procedure B was used followed by flash column chromatography (*n*-hexane/EtOAc 85:15) to afford a beige yellow oil (>20:1 dr, 0.773 g, 2.18 mmol) in 39% isolated yield.

<sup>1</sup>H NMR (400 MHz, CDCl<sub>3</sub>) δ 6.98 (d, *J* = 1.3 Hz, 1H), 6.92 (m, 2H), 6.73 (dd, *J* = 2.7, 1.0 Hz, 1H), 6.57 (dd, *J* = 2.7, 1.1 Hz, 1H), 5.60 (s, 1H), 5.06 (d, *J* = 9.2 Hz, 1H), 3.87 (s, 3H), 3.79 (s, 3H), 3.34 – 3.26 (m, 1H), 1.40 (d, *J* = 7.0 Hz, 3H), 1.39 (s, 9H).

<sup>13</sup>C{<sup>1</sup>H} NMR (101 MHz, CDCl<sub>3</sub>) δ 154.2, 151.3, 146.8, 145.6, 133.9, 133.8, 132.9, 119.2, 114.3, 111.7, 108.4, 106.3, 92.1, 56.1, 56.0, 46.1, 34.4, 29.4, 17.9.

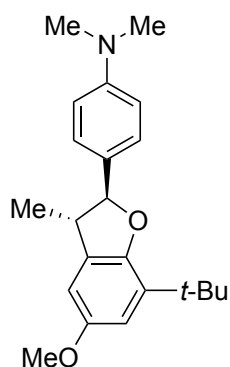

**(±)-4-(7-(*tert*-Butyl)-5-methoxy-3-methyl-2,3-dihydrobenzofuran-2-yl)-*N,N*-dimethylaniline (3af)**

General procedure C was followed using *N,N*-dimethyl-4-(prop-1-en-1-yl)aniline (**2h**) (0.56 mmol, 1.00 equiv), 2-*tert*-butyl-4-methoxyphenol (1.12 mmol, 2.00 equiv), TiO<sub>2</sub> (5.60 mmol, 10.0 equiv) and HFIP/TFT 1:1 mixture (4.00 mL, 0.14 M) for 8 h. General procedure B was

used followed by flash column chromatography (*n*-hexane/EtOAc 95:5) to afford a beige amorphous solid (7:3 dr, 0.12 g, 0.34 mmol) in 61% isolated yield.

<sup>1</sup>H NMR (600 MHz, CDCl<sub>3</sub>) major diastereomer δ 7.33 (t, *J* = 8.7 Hz, 2H), 6.81 – 6.77 (m, 2H), 6.72 – 6.71 (m, 1H), 6.57 (dd, *J* = 2.7, 1.1 Hz, 1H), 5.05 (d, *J* = 9.5 Hz, 1H), 3.80 (s, 3H), 3.38 – 3.27 (m, 1H), 2.98 (s, 6H), 1.40 (d, *J* = 8.1 Hz, 3H), 1.38 (s, 9H).

<sup>13</sup>C{<sup>1</sup>H} NMR (151 MHz, CDCl<sub>3</sub>) δ 154.0, 151.5, 133.6, 133.2, 127.5, 127.3, 111.4, 107.0, 106.2, 92.3, 87.5, 56.1, 45.8, 41.3, 34.4, 29.4, 17.6.

HRMS (ESI-TOF) *m/z* 340.2297 calcd for C<sub>22</sub>H<sub>30</sub>NO<sub>5</sub> [M + H]<sup>+</sup>; found 340.2277.

#### Elemental Composition Report

Page 1

#### Single Mass Analysis

Tolerance = 3.0 mDa / DBE: min = -1.5, max = 50.0

Element prediction: Off

Number of isotope peaks used for i-FIT = 3

Monoisotopic Mass, Even Electron Ions

343 formula(e) evaluated with 2 results within limits (up to 50 best isotopic matches for each mass)

Elements Used:

C: 8-40 H: 9-80 N: 0-5 O: 0-8 Na: 0-1

30-Aug-2023 08:58:34

JW\_L\_120 28 (1.396)

1: TOF MS ES+  
2.52e+005

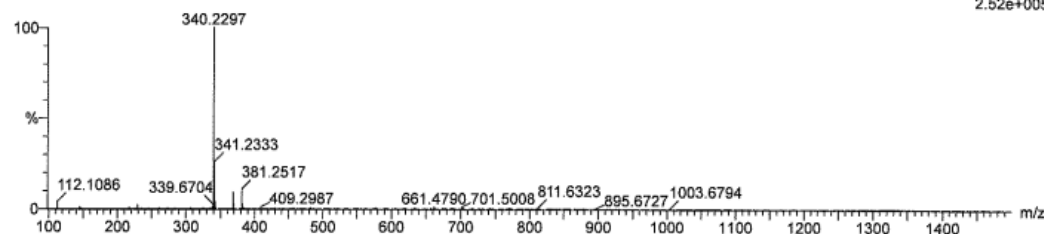

Minimum: -1.5  
Maximum: 3.0 10.0 50.0

| Mass     | Calc. Mass | mDa  | PPM  | DBE | i-FIT | i-FIT (Norm) | Formula          |
|----------|------------|------|------|-----|-------|--------------|------------------|
| 340.2297 | 340.2277   | 2.0  | 5.9  | 8.5 | 113.0 | 0.0          | C22 H30 N O2     |
|          | 340.2325   | -2.8 | -8.2 | 1.5 | 121.1 | 8.1          | C14 H31 N5 O3 Na |

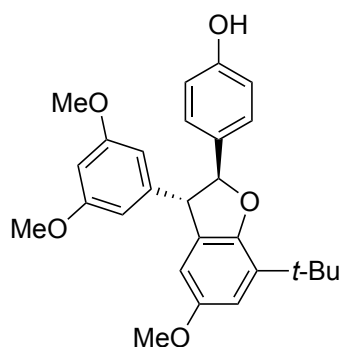

#### (±)-4-(7-(*tert*-Butyl)-3-(3,5-dimethoxyphenyl)-5-methoxy-2,3-dihydrobenzofuran-2-yl)phenol (3ae)

General procedure C was followed using pterostilbene (**2e**) (0.56 mmol, 1.00 equiv), 2-*tert*-butyl-4-methoxyphenol (1.12 mmol, 2.00 equiv), TiO<sub>2</sub> (5.60 mmol, 10.0 equiv) and HFIP/TFT 1:1 mixture (4.00 mL, 0.14 M) for 24 h. General procedure B was used followed by flash column chromatography (*n*-hexane/EtOAc 85:15) to afford a beige oil (>20:1 dr, 0.19 g, 0.44 mmol) in 79% isolated yield.



$^1\text{H}$  NMR (400 MHz,  $\text{CDCl}_3$ )  $\delta$  7.19 (d,  $J$  = 8.5 Hz, 2H), 6.80 (d,  $J$  = 8.6 Hz, 2H), 6.76 (dd,  $J$  = 2.7, 0.9 Hz, 1H), 6.42 – 6.36 (m, 2H), 6.32 (d,  $J$  = 2.3 Hz, 2H), 5.45 (d,  $J$  = 8.5 Hz, 1H), 4.33 (d,  $J$  = 8.5 Hz, 1H), 3.75 (s, 6H), 3.70 (s, 3H), 1.42 (s, 9H).

$^{13}\text{C}\{^1\text{H}\}$  NMR (151 MHz,  $\text{CDCl}_3$ )  $\delta$  161.2, 155.4, 154.4, 152.0, 144.5, 134.1, 130.7, 127.4, 115.4, 112.8, 107.2, 106.6, 99.1, 92.0, 58.8, 56.1, 55.5, 34.5, 29.7, 29.4.

HRMS (ESI-TOF)  $m/z$  435.2171 calcd for  $\text{C}_{27}\text{H}_{31}\text{O}_5$   $[\text{M} + \text{H}]^+$ ; found 435.2162.

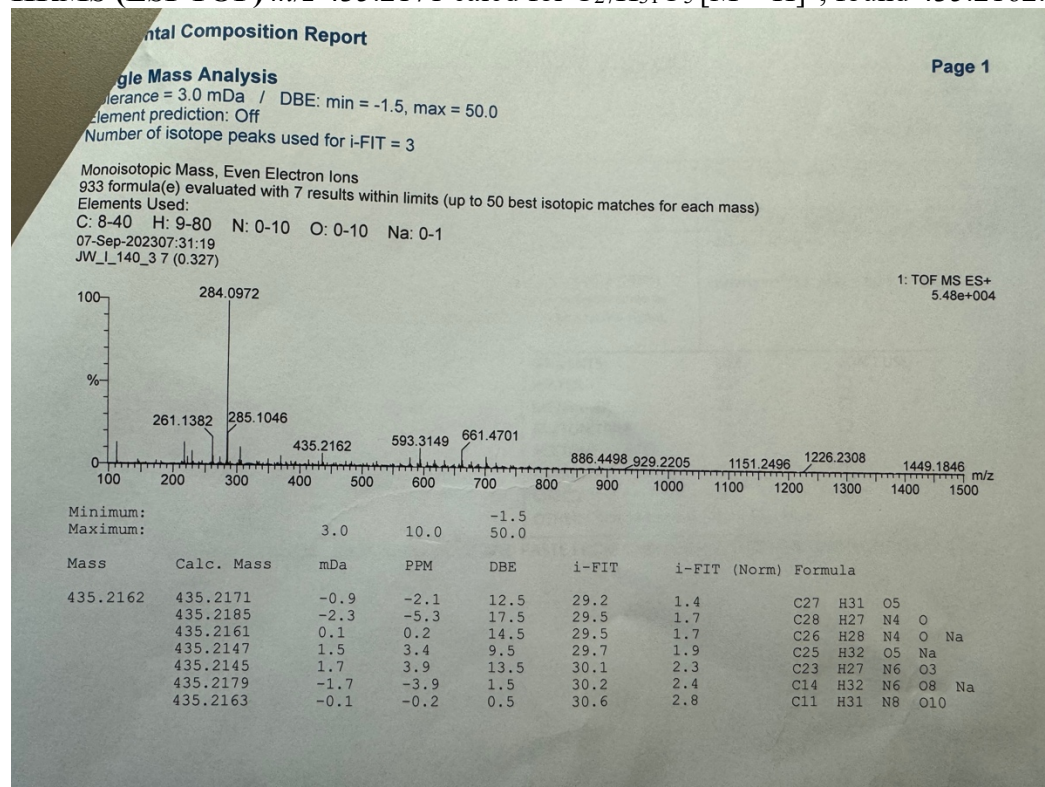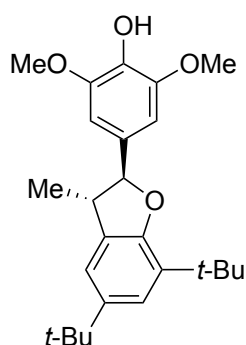

**(±)-4-(5,7-Di-*tert*-butyl-3-methyl-2,3-dihydrobenzofuran-2-yl)-2,6-dimethoxyphenol (3db)**

General procedure C was followed using 2,6-dimethoxy-4-(prop-1-en-1-yl)phenol (**2b**), 2,4-di-*tert*-butylphenol (0.56 mmol, 1.00 equiv), (1.12 mmol, 2.00 equiv),  $\text{TiO}_2$  (5.60 mmol, 10.0 equiv) and HFIP/TFT 1:1 mixture (4.00 mL, 0.14 M) for 12 h. General procedure B was used followed by flash column chromatography (*n*-hexane/EtOAc 80:20) to afford a beige amorphous solid (>20:1 dr, 0.05 g, 0.13 mmol) in 24% isolated yield.

$^1\text{H NMR}$  (400 MHz,  $\text{CDCl}_3$ )  $\delta$  7.19 (dd,  $J = 2.1, 0.8$  Hz, 1H), 7.02 (dd,  $J = 2.1, 1.1$  Hz, 1H), 6.69 (s, 2H), 5.06 (d,  $J = 9.5$  Hz, 1H), 3.89 (s, 6H), 3.33 (ddt,  $J = 9.5, 7.7, 6.2$  Hz, 1H), 1.44 (d,  $J = 6.8$  Hz, 3H), 1.42 (s, 9H), 1.34 (s, 9H).

$^{13}\text{C}\{^1\text{H}\}$  NMR (151 MHz,  $\text{CDCl}_3$ )  $\delta$  154.9, 147.2, 143.5, 134.5, 133.0, 132.0, 131.7, 122.2, 118.1, 102.8, 92.4, 56.4, 46.0, 34.7, 34.5, 32.0, 29.6, 17.8.

HRMS (ESI-TOF)  $m/z$  398.2457 calcd for  $\text{C}_{19}\text{H}_{23}\text{O}_4$   $[\text{M} + \text{H}]^+$ ; found 398.2459.

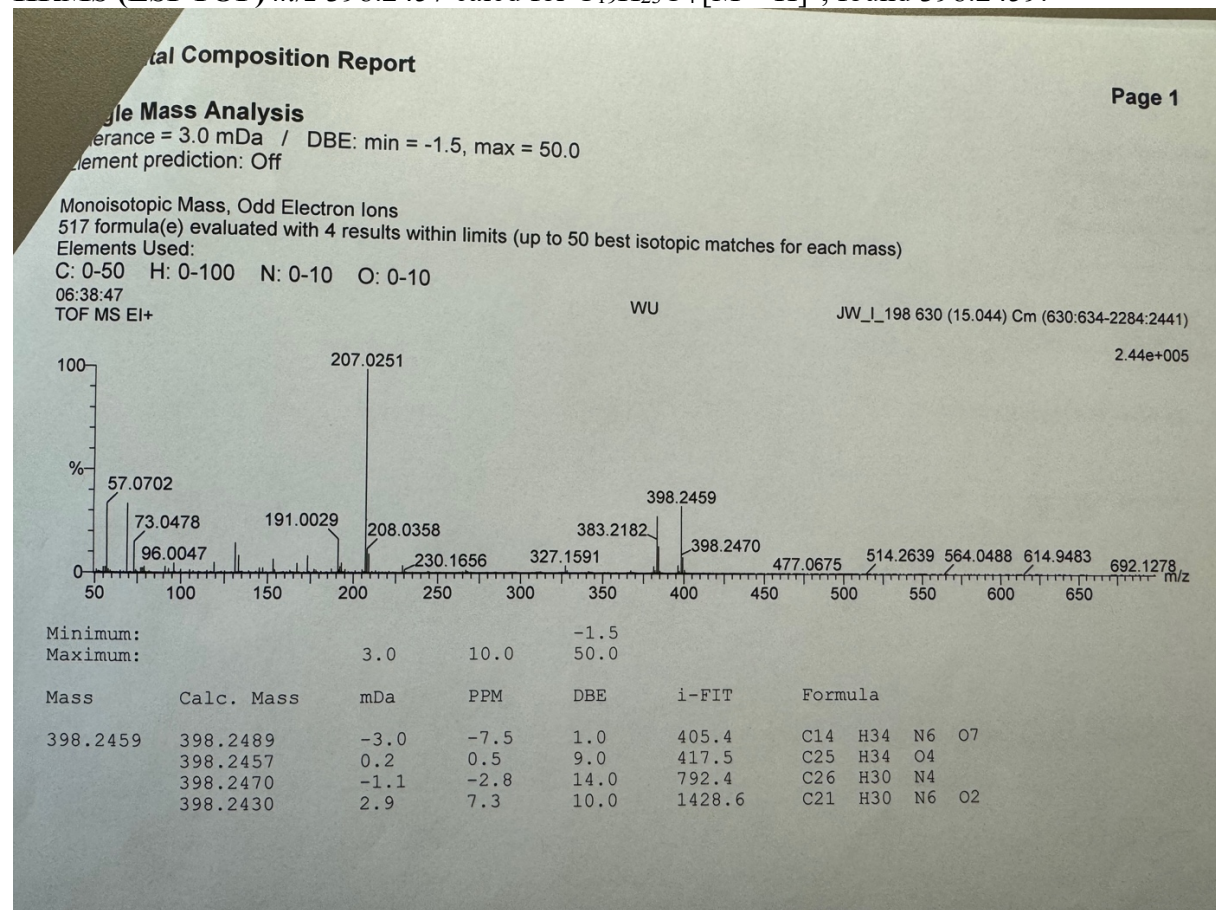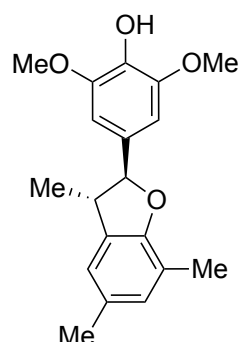

**(±)-2,6-Dimethoxy-4-(3,5,7-trimethyl-2,3-dihydrobenzofuran-2-yl)phenol (3eb)**

General procedure C was followed using 2,6-dimethoxy-4-(prop-1-en-1-yl)phenol (**2b**) (0.56 mmol, 1.00 equiv), 2,4-dimethylphenol (1.12 mmol, 2.00 equiv),  $\text{TiO}_2$  (5.60 mmol, 10.0 equiv) and HFIP/TFT 1:1 mixture (4.00 mL, 0.14 M) for 12 h. General procedure B was used followed

by flash column chromatography (*n*-hexane/EtOAc 80:20) to afford a beige amorphous solid (>20:1 dr, 0.05 g, 0.18 mmol) in 32% isolated yield.

$^1\text{H NMR}$  (400 MHz,  $\text{CDCl}_3$ )  $\delta$  6.83 (s, 1H), 6.79 (s, 1H), 6.67 (s, 2H), 5.52 (s, 1H), 5.01 (d,  $J = 9.5$  Hz, 1H), 3.89 (s, 6H), 3.41 (dq,  $J = 9.5, 6.6$  Hz, 1H), 2.29 (s, 3H), 2.23 (s, 3H), 1.38 (d,  $J = 6.8$  Hz, 3H).

$^{13}\text{C}\{^1\text{H}\}$  NMR (151 MHz,  $\text{CDCl}_3$ )  $\delta$  155.5, 147.2, 134.8, 132.0, 131.4, 130.2 (2), 121.5, 119.4, 103.4, 93.0, 56.5, 46.0, 20.9, 17.7, 15.4.

HRMS (ESI-TOF)  $m/z$  314.1596 calcd for  $\text{C}_{19}\text{H}_{23}\text{O}_4$   $[\text{M} + \text{H}]^+$ ; found 314.1609.

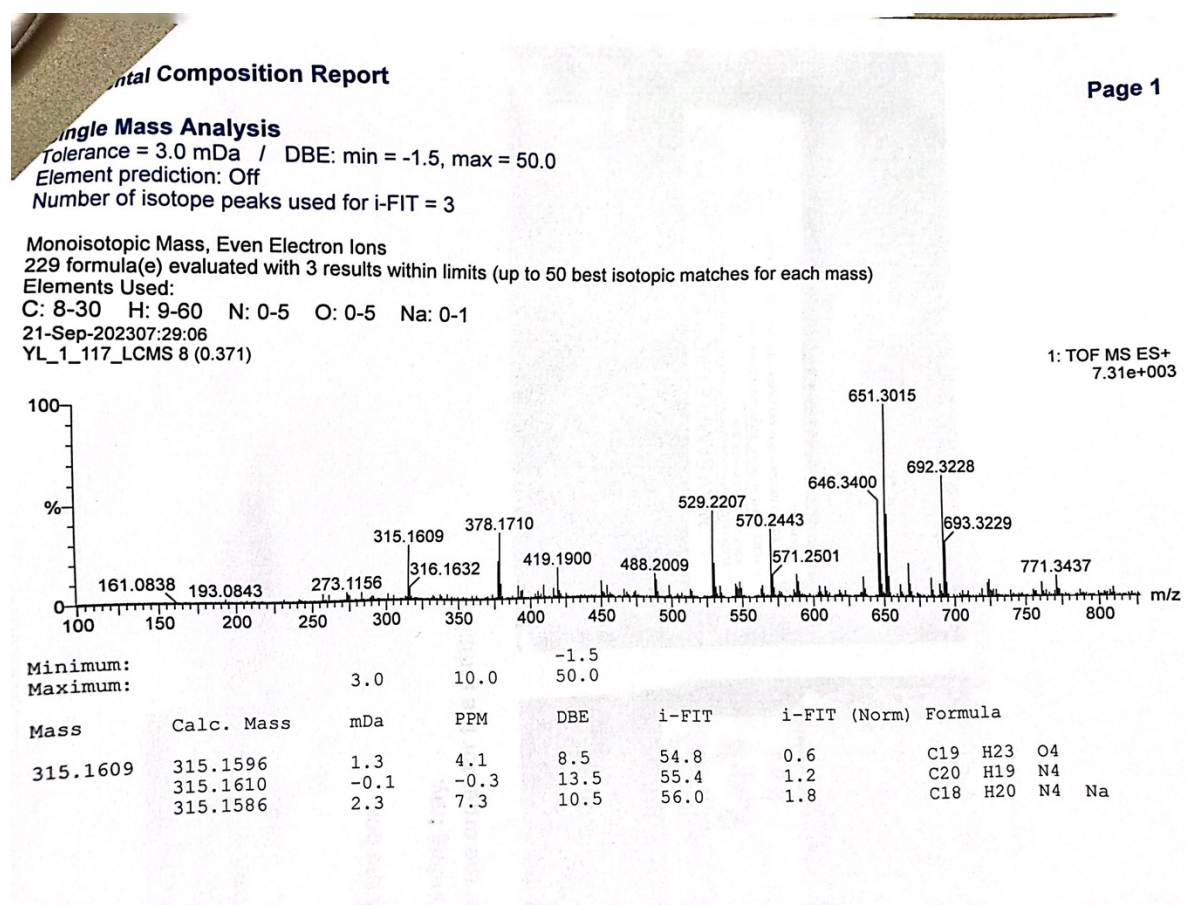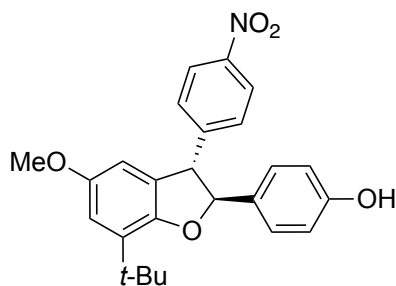

(±)-4-(-7-(*tert*-Butyl)-5-methoxy-3-(4-nitrophenyl)-2,3-dihydrobenzofuran-2-yl)phenol (3ag)



General procedure C was followed using 4-hydroxy-4'-nitrostilbene (**2g**) (0.60 mmol, 1.00 equiv), 2-*tert*-butyl-4-methoxyphenol (0.60 mmol, 1.00 equiv), TiO<sub>2</sub> (6.00 mmol, 10.0 equiv) and HFIP/TFT 5:1 mixture (6.00 mL, 0.1 M) for 24 h. General procedure B was used followed by flash column chromatography (*n*-hexane/EtOAc 80:20) to afford a yellow oil (>20:1 dr, 0.17 g, 0.41 mmol) in 69% isolated yield.

<sup>1</sup>H NMR (400 MHz, CDCl<sub>3</sub>) δ 8.20 (d, *J* = 8.8 Hz, 2H), 7.35 (d, *J* = 8.8 Hz, 2H), 7.16 (d, *J* = 8.4 Hz, 2H), 6.85 – 6.79 (m, 3H), 6.30 (dd, *J* = 2.7, 1.0 Hz, 1H), 5.41 (d, *J* = 8.6 Hz, 1H), 4.54 (d, *J* = 8.6 Hz, 1H), 3.70 (s, 3H), 1.42 (s, 9H).

<sup>13</sup>C NMR (126 MHz, CDCl<sub>3</sub>) δ 155.8, 154.6, 152.1, 149.5, 147.4, 134.6, 132.9, 129.7, 129.5, 127.4, 124.3, 115.7, 113.3, 106.9, 92.1, 58.6, 56.0, 34.6, 29.4.

HRMS (EI-TOF) *m/z* 419.1733 calcd for C<sub>25</sub>H<sub>25</sub>NO<sub>5</sub> [M]<sup>+</sup>; found 419.1719.

Page 1

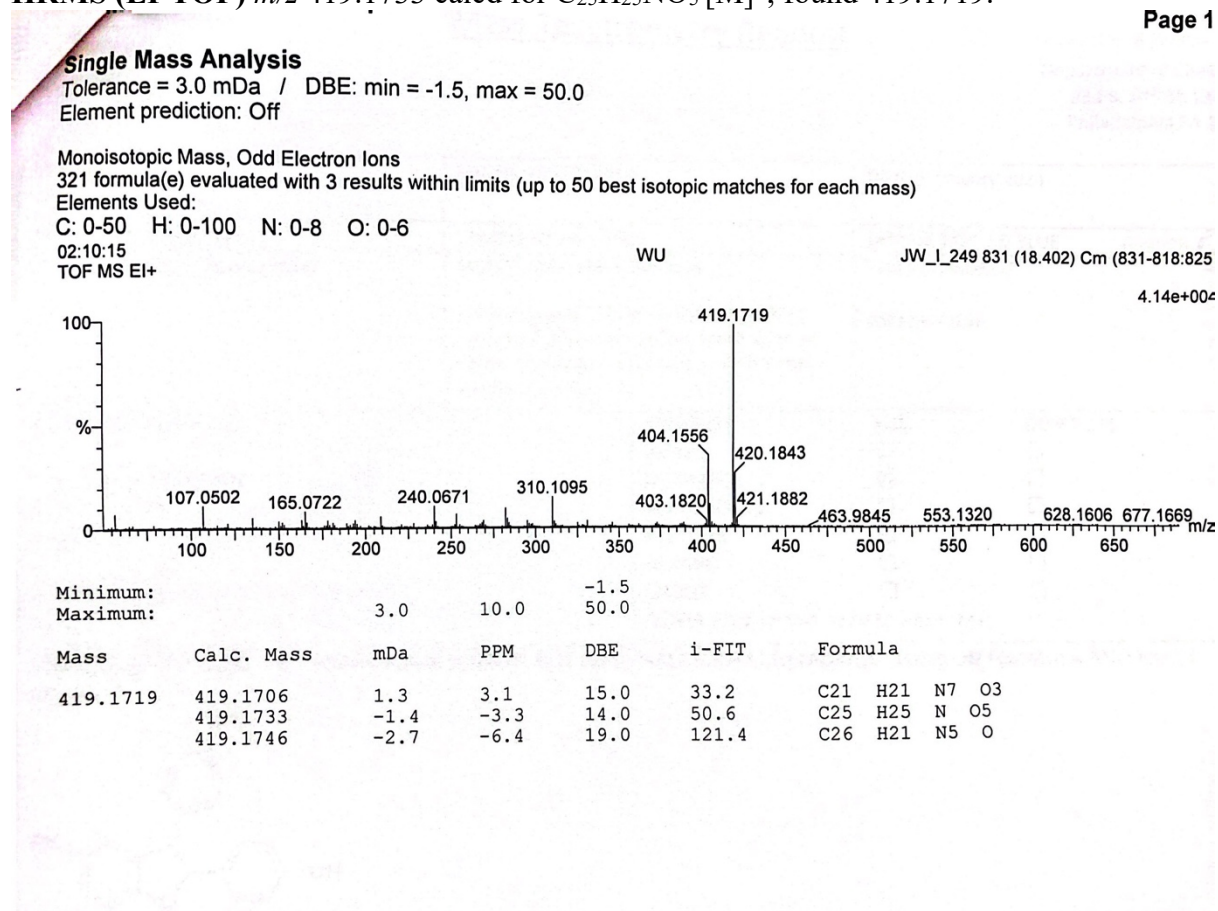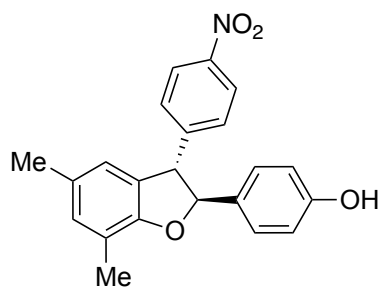

(±)-4-(-5,7-Dimethyl-3-(4-nitrophenyl)-2,3-dihydrobenzofuran-2-yl)phenol (**3eg**)

General procedure C was followed using 4-hydroxy-4'-nitrostilbene (**2g**) (0.60 mmol, 1.00 equiv), 2,4-dimethoxyphenol (0.60 mmol, 1.00 equiv), TiO<sub>2</sub> (6.00 mmol, 10.0 equiv) and HFIP/TFT 5:1 mixture (6.00 mL, 0.1 M) for 24 h. General procedure B was used followed by flash column chromatography (*n*-hexane/EtOAc 80:20) to afford a yellow oil (>20:1 dr, 0.14 g, 0.39 mmol) in 65% isolated yield.

<sup>1</sup>H NMR (500 MHz, CDCl<sub>3</sub>) δ 8.19 (d, *J* = 8.7 Hz, 2H), 7.34 (d, *J* = 8.7 Hz, 2H), 7.19 (d, *J* = 8.5 Hz, 2H), 6.90 (s, 1H), 6.82 (d, *J* = 8.5 Hz, 2H), 6.57 (s, 1H), 5.39 (d, *J* = 8.5 Hz, 1H), 5.00 (s, 1H), 4.62 (d, *J* = 8.5 Hz, 1H), 2.29 (s, 3H), 2.24 (s, 3H).

<sup>13</sup>C NMR (126 MHz, CDCl<sub>3</sub>) δ 156.3, 155.9, 149.7, 147.3, 132.5, 131.4, 130.9, 129.4, 128.3, 127.8, 124.2, 122.8, 119.9, 115.8, 92.3, 58.5, 20.9, 15.5.

HRMS (EI-TOF) *m/z* 361.1314 calcd for C<sub>22</sub>H<sub>19</sub>NO<sub>4</sub> [M]<sup>+</sup>; found 361.1304.

page 1

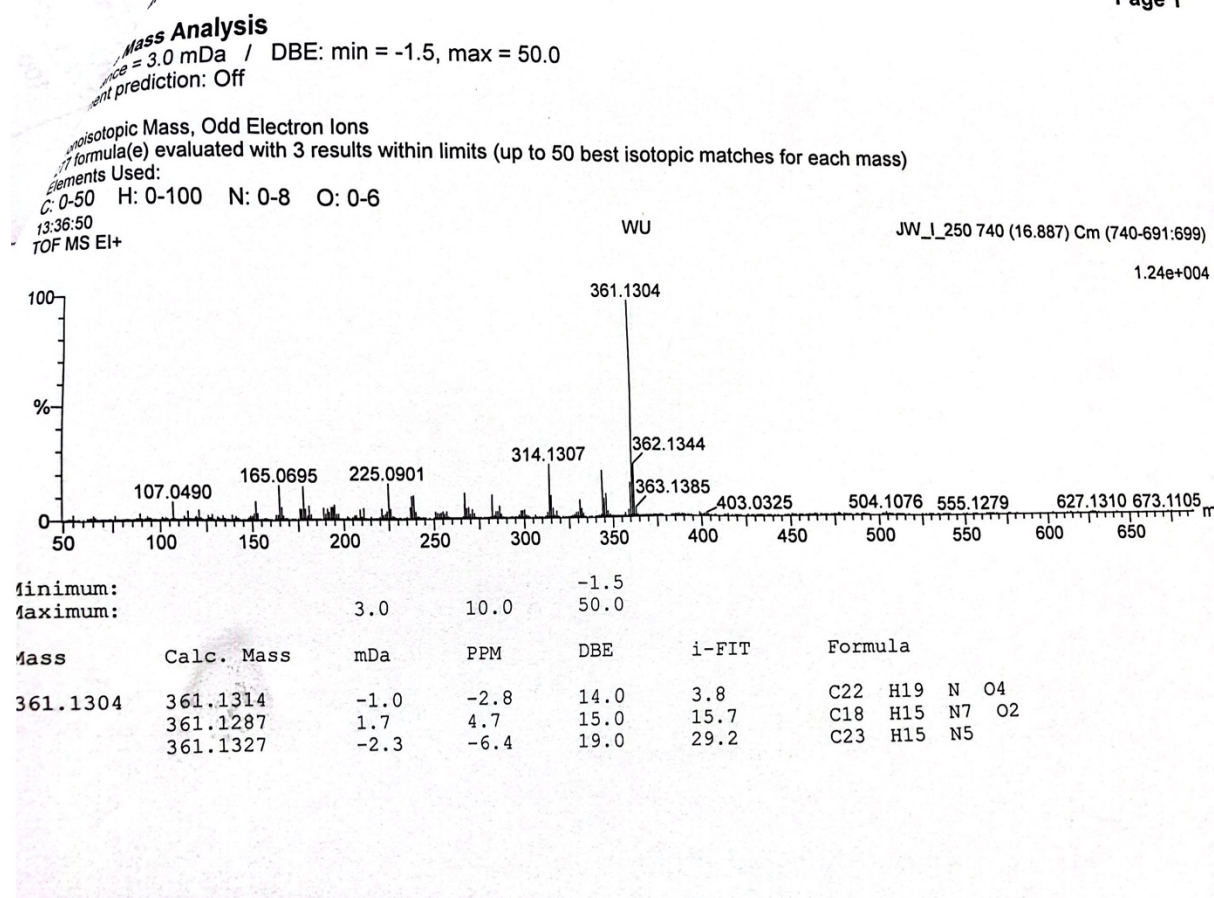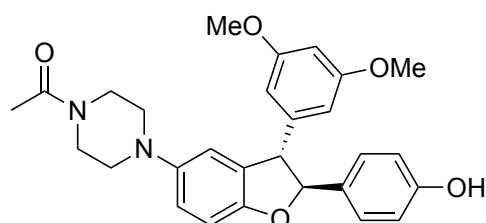

(±)-1-(4-(3-(3,5-Dimethoxyphenyl)-2-(4-hydroxyphenyl)-2,3-dihydrobenzofuran-5-yl)piperazin-1-yl)ethan-1-one (**3ge**)

General procedure C was followed using pterostilbene (**2e**) (0.60 mmol, 1.00 equiv), 1-(4-(4-hydroxyphenyl)piperazin-1-yl)ethan-1-one (**1g**) (0.60 mmol, 1.00 equiv), TiO<sub>2</sub> (6.00 mmol, 10.0 equiv) and HFIP/TFT 1:1 mixture (6.00 mL, 0.1 M) for 24 h. General procedure B was used followed by flash column chromatography (EtOAc) to afford a white amorphous solid (>20:1 dr, 0.173 g, 0.365 mmol) in 65% isolated yield.

<sup>1</sup>H NMR (400 MHz, CDCl<sub>3</sub>) δ 7.26 – 7.13 (m, 2H), 6.87 – 6.77 (m, 4H), 6.64 (d, *J* = 2.2 Hz, 1H), 6.38 (t, *J* = 2.3 Hz, 1H), 6.30 (d, *J* = 2.3 Hz, 2H), 5.44 (d, *J* = 8.5 Hz, 1H), 4.43 (d, *J* = 8.5 Hz, 1H), 3.73 (s, 6H), 3.74-3.75 (m, 2H), 3.57 (dd, *J* = 6.4, 3.9 Hz, 2H), 3.04 – 2.91 (m, 4H), 2.13 (s, 3H).

<sup>13</sup>C NMR (101 MHz, CDCl<sub>3</sub>) δ 169.5, 161.1, 156.5, 154.9, 146.1, 144.0, 132.1, 130.9, 127.5, 118.5, 115.7, 115.5, 109.6, 106.5, 98.9, 92.9, 58.3, 55.4, 51.6, 51.4, 46.5, 41.8, 21.3.

HRMS (ESI-TOF) *m/z* 475.2233 calcd for C<sub>28</sub>H<sub>31</sub>N<sub>2</sub>O<sub>5</sub> [M+H]<sup>+</sup>; found 475.2223.

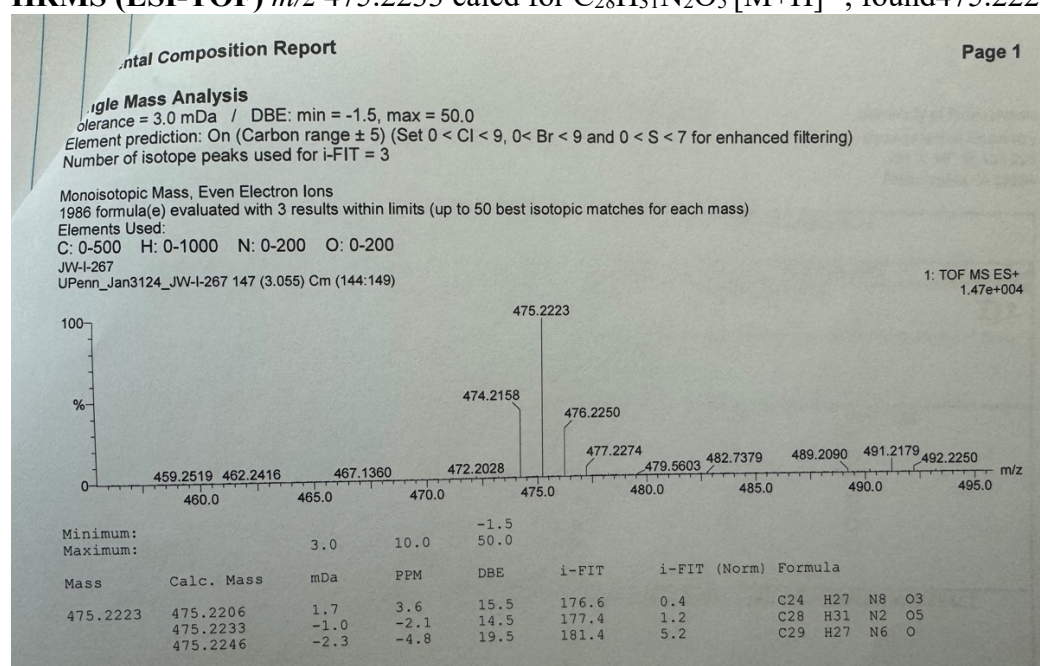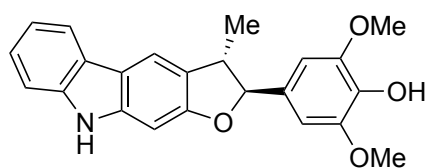

(±)-2,6-dimethoxy-4-(-3-methyl-3,5-dihydro-2H-furo[3,2-b]carbazol-2-yl)phenol (**3fb**)

General procedure C was followed using 2,6-dimethoxy-4-(prop-1-en-1-yl)phenol (**2b**) (0.60 mmol, 1.00 equiv), 2-hydroxycarbazole (**1f**) (0.60 mmol, 1.00 equiv), TiO<sub>2</sub> (6.00 mmol, 10.0 equiv) and HFIP/TFT 5:1 mixture (6.00 mL, 0.1 M) for 8 h. General procedure B was used followed by flash column chromatography (*n*-hexane/EtOAc 80:20) to afford a colorless oil (2:1 dr, 0.057 g, 0.15 mmol) in 27% isolated yield.

<sup>1</sup>H NMR (400 MHz, CDCl<sub>3</sub>) δ 8.04 – 7.96 (m, 1H), 7.80 (s, 1H), 7.46 – 7.31 (m, 2H), 7.26-7.19 (m, 1H), 6.91 (s, 1H), 6.73 (s, 2H), 5.56 (s, 1H), 5.16 (d, *J* = 9.0 Hz, 1H), 3.93 (s, 6H), 3.66 – 3.54 (m, 1H), 1.54 (d, *J* = 6.7 Hz, 3H).

$^{13}\text{C}$  NMR (151 MHz,  $\text{CDCl}_3$ )  $\delta$  158.7, 147.2, 140.3, 139.5, 134.8, 131.6, 125.4, 124.3, 123.6, 119.5, 119.1, 117.6, 114.9, 110.3, 103.2, 94.0, 91.6, 56.4, 45.1, 18.0.

HRMS (ESI-TOF)  $m/z$  376.1549 calcd for  $\text{C}_{23}\text{H}_{22}\text{NO}_4$   $[\text{M}+\text{H}]^+$ ; found 376.1555.

#### Elemental Composition Report

Page 1

#### Single Mass Analysis

Tolerance = 3.0 mDa / DBE: min = -1.5, max = 50.0

Element prediction: On (Carbon range  $\pm 5$ ) (Set 0 < Cl < 9, 0 < Br < 9 and 0 < S < 7 for enhanced filtering)

Number of isotope peaks used for i-FIT = 3

Monoisotopic Mass, Even Electron Ions

1049 formula(e) evaluated with 2 results within limits (up to 50 best isotopic matches for each mass)

Elements Used:

C: 0-500 H: 0-1000 N: 0-200 O: 0-200

JW-I-262

UPenn\_Jan2424\_JW-I-262 214 (4.435) Cm (211:216)

1: TOF MS ES+  
1.49e+004

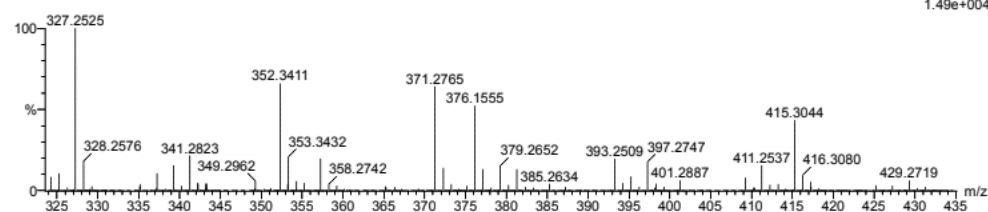

Minimum: -1.5  
Maximum: 50.0

| Mass     | Calc. Mass | mDa  | PPM  | DBE  | i-FIT | i-FIT (Norm) | Formula      |
|----------|------------|------|------|------|-------|--------------|--------------|
| 376.1555 | 376.1549   | 0.6  | 1.6  | 13.5 | 178.1 | 0.3          | C23 H22 N O4 |
|          | 376.1562   | -0.7 | -1.9 | 18.5 | 179.1 | 1.3          | C24 H18 N5   |

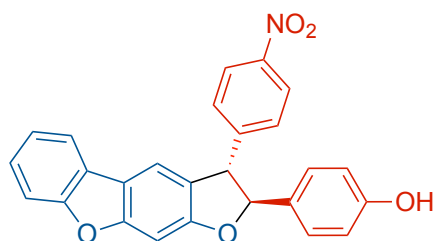

#### (±)4-(-3-(4-Nitrophenyl)-3,9-dihydro-2H-furo[2,3-b]dibenzofuran-2-yl)phenol (**3hg**)

General procedure C was followed using 4-(4-nitrostyryl)phenol (**2g**) (0.56 mmol, 1.00 equiv), dibenzo[b,d]furan-3-ol (**1h**) (0.56 mmol, 1.00 equiv),  $\text{TiO}_2$  (5.60 mmol, 10.0 equiv) and HFIP/TFT 5:1 mixture (6.0 mL, 0.1 M) for 28 h. General procedure B was used followed by flash column chromatography (*n*-hexane/EtOAc 70:30) to afford a white amorphous solid (>20:1 dr, 0.089 g, 0.21 mmol) in 38% isolated yield.

$^1\text{H}$  NMR (400 MHz, Acetone)  $\delta$  8.52 (s, 1H), 8.28 – 8.21 (m, 2H), 7.62 – 7.57 (m, 3H), 7.54 (dt,  $J = 8.4, 0.9$  Hz, 1H), 7.38 (ddd,  $J = 8.4, 7.0, 1.7$  Hz, 1H), 7.34 – 7.30 (m, 2H), 7.16 (d,  $J = 8.8$  Hz, 1H), 7.06 – 6.95 (m, 2H), 6.92 – 6.84 (m, 2H), 5.62 (d,  $J = 7.4$  Hz, 1H), 5.34 (d,  $J = 7.5$  Hz, 1H).

$^{13}\text{C}$  NMR (101 MHz, Acetone)  $\delta$  157.8, 157.0, 156.7, 151.8, 149.3, 147.4, 131.1, 129.4, 127.7, 124.2, 122.7, 122.6, 122.5, 121.1, 121.0, 115.5, 115.4, 111.6, 111.4, 108.8, 93.5, 56.8.



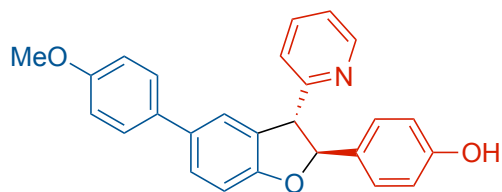

**(±)-4-(-5-(4-Methoxyphenyl)-3-(pyridin-2-yl)-2,3-dihydrobenzofuran-2-yl)phenol (3ih)**

General procedure C was followed using 4-(2-(pyridin-2-yl)vinyl)phenol (**2h**) (0.56 mmol, 1.00 equiv), 4-methoxy-[1,1-biphenyl]-4-ol (**1i**) (0.84 mmol, 1.50 equiv), TiO<sub>2</sub> (5.60 mmol, 10.0 equiv) and HFIP/TFT 1:1 mixture (10.0 mL, 0.056 M) for 24 h. General procedure B was used followed by flash column chromatography (*n*-hexane/EtOAc 70:30) to afford a yellow amorphous solid (>20:1 dr, 0.090 g, 0.23 mmol) in 41% isolated yield.

**<sup>1</sup>H NMR (600 MHz, DMSO)** δ 9.59 (s, 1H), 8.22 (d, *J* = 8.7 Hz, 2H), 7.53 (d, *J* = 8.8 Hz, 2H), 7.48 (m, 3H), 7.45 (d, *J* = 8.7 Hz, 1H), 7.22 (d, *J* = 8.6 Hz, 1H), 7.16 (t, *J* = 1.5 Hz, 1H), 7.01 (d, *J* = 8.4 Hz, 1H), 6.94 (d, *J* = 8.8 Hz, 2H), 6.77 (d, *J* = 8.6 Hz, 2H), 5.60 (d, *J* = 8.2 Hz, 1H), 4.92 (d, *J* = 8.2 Hz, 1H), 3.75 (s, 3H).

**<sup>13</sup>C NMR (151 MHz, DMSO)** δ 158.8, 158.7, 158.2, 149.7, 147.2, 133.9, 132.9, 131.1, 130.0, 129.9, 128.4, 127.8, 127.7, 124.5, 123.3, 115.8, 114.7, 110.3, 92.3, 56.1, 55.6. One carbon signal is overlapping.

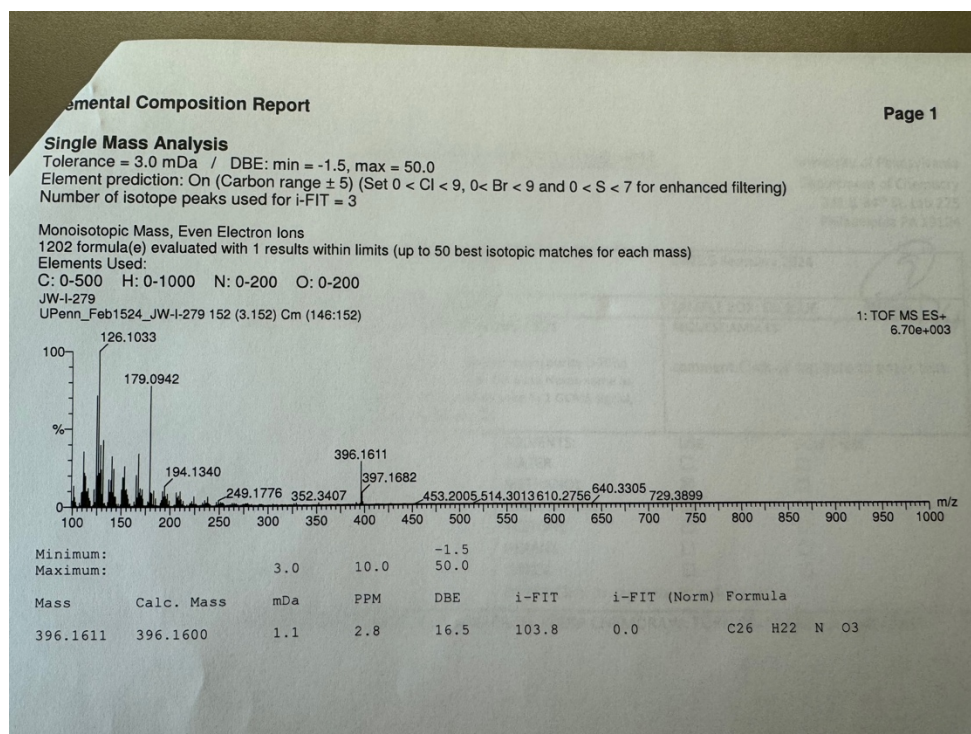

**HRMS (ESI-TOF)** *m/z* 396.1600 calcd for C<sub>26</sub>H<sub>22</sub>NO<sub>3</sub> [M+H]<sup>+</sup>; found 396.1611.



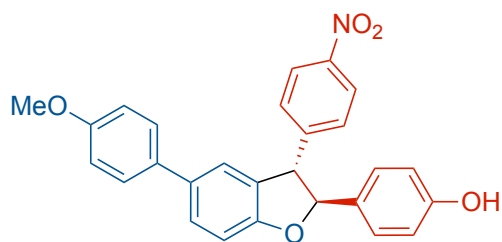

**(±)-4-(-5-(4-Methoxyphenyl)-3-(4-nitrophenyl)-2,3-dihydrobenzofuran-2-yl)phenol (3ig)**

General procedure C was followed using 4-(4-nitrostyryl)phenol (**2g**) (0.56 mmol, 1.00 equiv), 4-methoxy-[1,1-biphenyl]-4-ol (**1i**) (1.12 mmol, 2.00 equiv), TiO<sub>2</sub> (5.60 mmol, 10.0 equiv) and HFIP/TFT 7:5 mixture (12.0 mL, 0.047 M) for 28 h. General procedure B was used followed by flash column chromatography (*n*-hexane/EtOAc 70:30) to afford a yellow amorphous solid (>20:1 dr, 0.090 g, 0.23 mmol) in 88% isolated yield.

**<sup>1</sup>H NMR (400 MHz, DMSO)** δ 9.58 (s, 1H), 8.22 (d, *J* = 8.7 Hz, 2H), 7.53 (d, *J* = 8.8 Hz, 2H), 7.50 – 7.40 (m, 3H), 7.22 (d, *J* = 8.5 Hz, 2H), 7.16 (s, 1H), 7.01 (d, *J* = 8.3 Hz, 1H), 6.94 (d, *J* = 8.8 Hz, 2H), 6.77 (d, *J* = 8.5 Hz, 2H), 5.60 (d, *J* = 8.2 Hz, 1H), 4.92 (d, *J* = 8.2 Hz, 1H), 3.75 (s, 3H).

**<sup>13</sup>C NMR (101 MHz, DMSO)** δ 158.8, 158.7, 158.2, 149.7, 147.2, 133.9, 132.9, 131.1, 130.0, 129.9, 128.4, 127.8, 127.7, 124.5, 123.3, 115.8, 114.7, 110.3, 92.3, 56.1, 55.6.

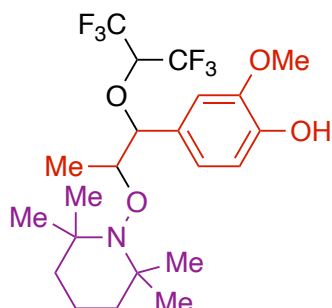

**4-(1-((1,1,1,3,3,3-Hexafluoropropan-2-yl)oxy)-2-((2,2,6,6-tetramethylpiperidin-1-yl)oxy)propyl)-2-methoxyphenol (2a-TEMPO)**

**2a-TEMPO** was prepared as described in the radical trapping experiment section.

**<sup>1</sup>H NMR (600 MHz, CDCl<sub>3</sub>)** δ 6.91 – 6.87 (m, 2H), 6.79 (dd, *J* = 8.0, 1.9 Hz, 1H), 5.67 (s, 1H), 4.60 (d, *J* = 6.1 Hz, 1H), 4.29 (quintet, *J* = 6.4 Hz, 1H), 4.07 (quintet, *J* = 5.9 Hz, 1H), 3.88 (s, 3H), 1.61 – 1.24 (m, 5H), 1.23 – 1.00 (m, 16H).

**<sup>13</sup>C NMR (101 MHz, CDCl<sub>3</sub>)** δ 146.6, 146.2, 127.6, 121.9 (q, *J*<sub>C-F</sub> = 107.4 Hz), 122.3, 114.0, 110.5, 87.3, 80.2, 72.6 (t, *J*<sub>C-F</sub> = 32.4 Hz), 61.0, 59.0, 55.9, 40.6, 40.3, 34.3, 34.0, 20.5, 20.3, 17.3, 16.5.

**<sup>19</sup>F NMR (376 MHz, CDCl<sub>3</sub>)** δ -72.04 (q, *J* = 9.5 Hz), -73.30 (q, *J* = 9.4 Hz).

## Computation Details

### General Remarks

All optimizations of intermediates and transition states were calculated using unrestricted B3LYP<sup>10</sup>-D3<sup>11</sup> with Stuttgart/Dresden ECP (SDD)<sup>12</sup> basis set for Ti and the 6-31G(d,p)<sup>13</sup> basis set for other atoms using an ultrafine (99,590) grid with the “opt=noeigen” keyword as implemented in Gaussian16. Frequency calculations, using the same method, were used to obtain thermal corrections (at 298.15K; enthalpy and free energy) and to characterize the obtained stationary points as transition states (only one single imaginary frequency) or intermediate (zero imaginary frequencies). Conformational searches were performed manually for all intermediates and transition states, and only the lowest energy species were shown and discussed. Intrinsic reaction coordinate (IRC)<sup>14</sup> calculations were undertaken to ensure that the transition states connect to the correct associated local minima. Single point energy calculations using UM06<sup>15</sup>/6-311++G(d,p)<sup>16</sup> with implicit solvent (1,1,1,3,3,3-hexafluoro-2-propanol,  $\epsilon=16.7$ ) using CPCM<sup>17</sup> were also performed on all structures. Vibrational frequencies were corrected using Truhlar’s quasiharmonic oscillator approximation, setting all vibrational frequencies below 100 cm<sup>-1</sup> to 100 cm<sup>-1</sup>.<sup>18</sup> The quasiharmonic oscillator corrections were obtained using the GoodVibes.py program by Prof. Robert Paton.<sup>19</sup> UV-Vis spectra were simulated with TD-DFT using the same geometry optimization method with the additional keyword IOP(9/40=2). Obtained outputs were opened in GaussSum 3.0<sup>20</sup> and the corresponding electronic transitions were generated (see instructions on GaussSum webpage). All 3-D structures were generated using CYLview.<sup>21</sup> Spin density values were obtained using Natural Bond Order (NBO) analysis. Noncovalent interaction (NCI) analysis, also known as reduce density gradient (RDG) method, was performed on Multiwfn to study the possible effect of noncovalent interaction in different conformations.<sup>22</sup> Extension distance of 0 Bohr, medium quality grid (totally about 512000 points) were set by default. Further visualization of the color-filled RDG isosurface was realized by VMD, where RDG isosurface and color range were set as 0.5, and -0.035 to 0.2, respectively.<sup>23</sup>

### Full Reference of Gaussian 16 Software

Gaussian 16, Revision B.01, M. J. Frisch, G. W. Trucks, H. B. Schlegel, G. E. Scuseria, M. A. Robb, J. R. Cheeseman, G. Scalmani, V. Barone, G. A. Petersson, H. Nakatsuji, X. Li, M. Caricato, A. V. Marenich, J. Bloino, B. G. Janesko, R. Gomperts, B. Mennucci, H. P. Hratchian, J. V. Ortiz, A. F. Izmaylov, J. L. Sonnenberg, D. Williams-Young, F. Ding, F. Lipparini, F. Egidi, J. Goings, B. Peng, A. Petrone, T. Henderson, D. Ranasinghe, V. G. Zakrzewski, J. Gao, N. Rega, G. Zheng, W. Liang, M. Hada, M. Ehara, K. Toyota, R. Fukuda, J. Hasegawa, M. Ishida, T. Nakajima, Y. Honda, O. Kitao, H. Nakai, T. Vreven, K. Throssell, J. A. Montgomery, Jr., J. E. Peralta, F. Ogliaro, M. J. Bearpark, J. J. Heyd, E. N. Brothers, K. N. Kudin, V. N. Staroverov, T. A. Keith, R. Kobayashi, J. Normand, K. Raghavachari, A. P. Rendell, J. C. Burant, S. S. Iyengar, J. Tomasi, M. Cossi, J. M. Millam, M. Klene, C. Adamo, R. Cammi, J. W. Ochterski, R. L. Martin, K. Morokuma, O. Farkas, J. B. Foresman, and D. J. Fox, Gaussian, Inc., Wallingford CT, 2016.

### Supporting Figures

**Table S3.** Excitation energies, oscillator strength, and main transitions calculated at TD-UB3LYP-D3/6-31G(d,p)-SDD(Ti) level for TiO<sub>2</sub>-**2a** adduct. Wavefunctions and contributions to the electronic transitions are presented in the last column.

| Wavelength (nm) | Oscillator Strength (f) | Wavefunction ( coefficient  <sup>2</sup> ) |
|-----------------|-------------------------|--------------------------------------------|
| 524.11          | 0.0004                  | HOMO→LUMO (37%)                            |

|        |        |                   |
|--------|--------|-------------------|
| 490.75 | 0.0001 | HOMO→LUMO+2 (27%) |
| 471.76 | 0.0003 | HOMO→LUMO+1 (40%) |
| 433.51 | 0.0205 | HOMO→LUMO+3 (43%) |
| 407.37 | 0.1079 | HOMO→LUMO+4 (13%) |

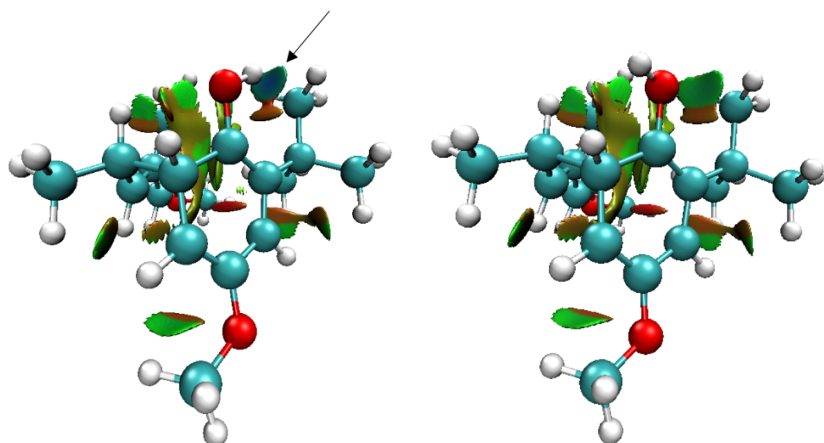

**Figure S28.** NCI plots of two conformations for **int-7**, showing that the hydroxyl is not pointing away from the *tert*-butyl after the coupling as it is in **1a**.

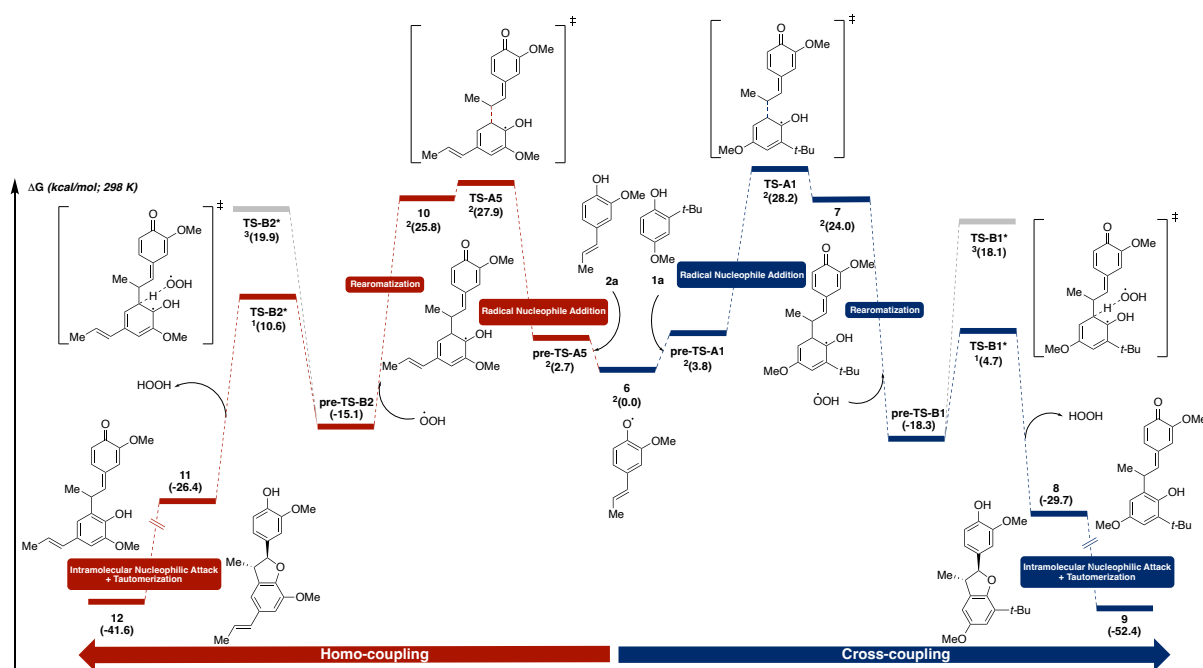

**Figure S29.** More complete energy profile with grey pathways representing triplet spin states. Free energies were computed using UM06/6-311++G(d,p)-CPCM(HFIP)//UB3LYP-D3/6-31G(d,p).

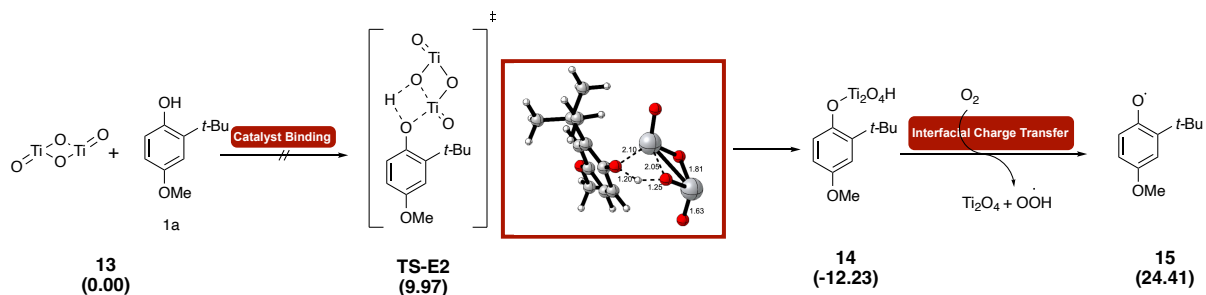

**Figure S30.** Less favored alternative pathway to generate common intermediate, phenoxyl radical **15**. Free energies were computed using UM06/6-311++G(d,p)-SDD(Ti) CPCM(HFIP)/UB3LYP-D3/6-31G(d,p)-SDD(Ti).

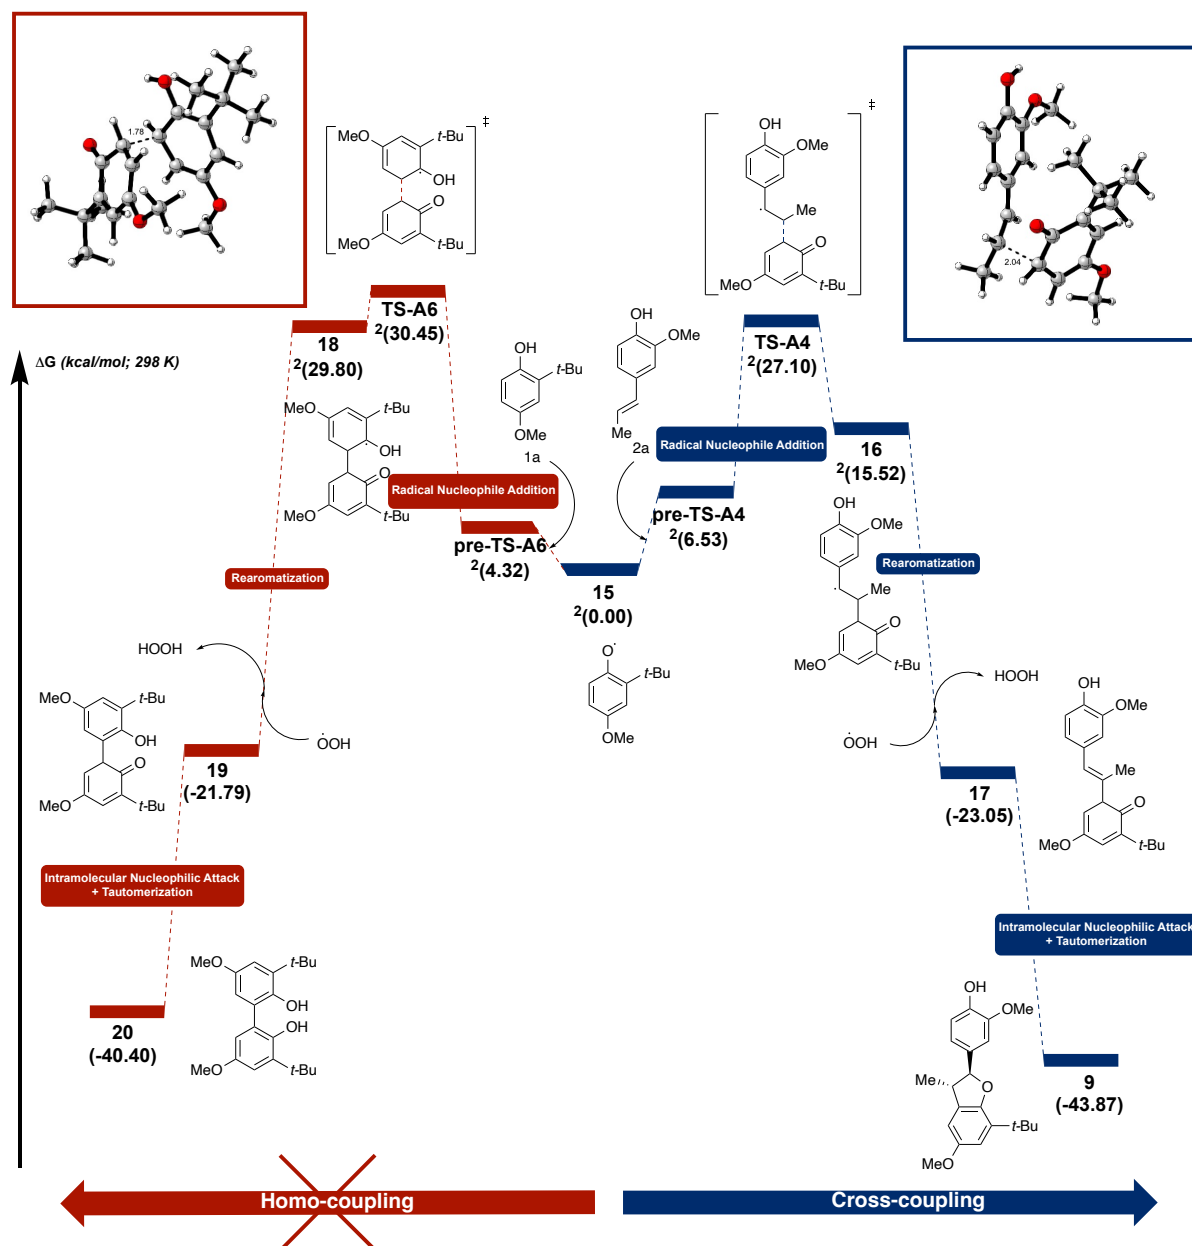

**Figure S31.** Alternative PES showing **1a** homocoupling is energetically unfavorable, thus using excess **1a** will not lead to large amount of undesired byproducts. Free energies were computed using UM06/6-311++G(d,p)-CPCM(HFIP)/UB3LYP-D3/6-31G(d,p).

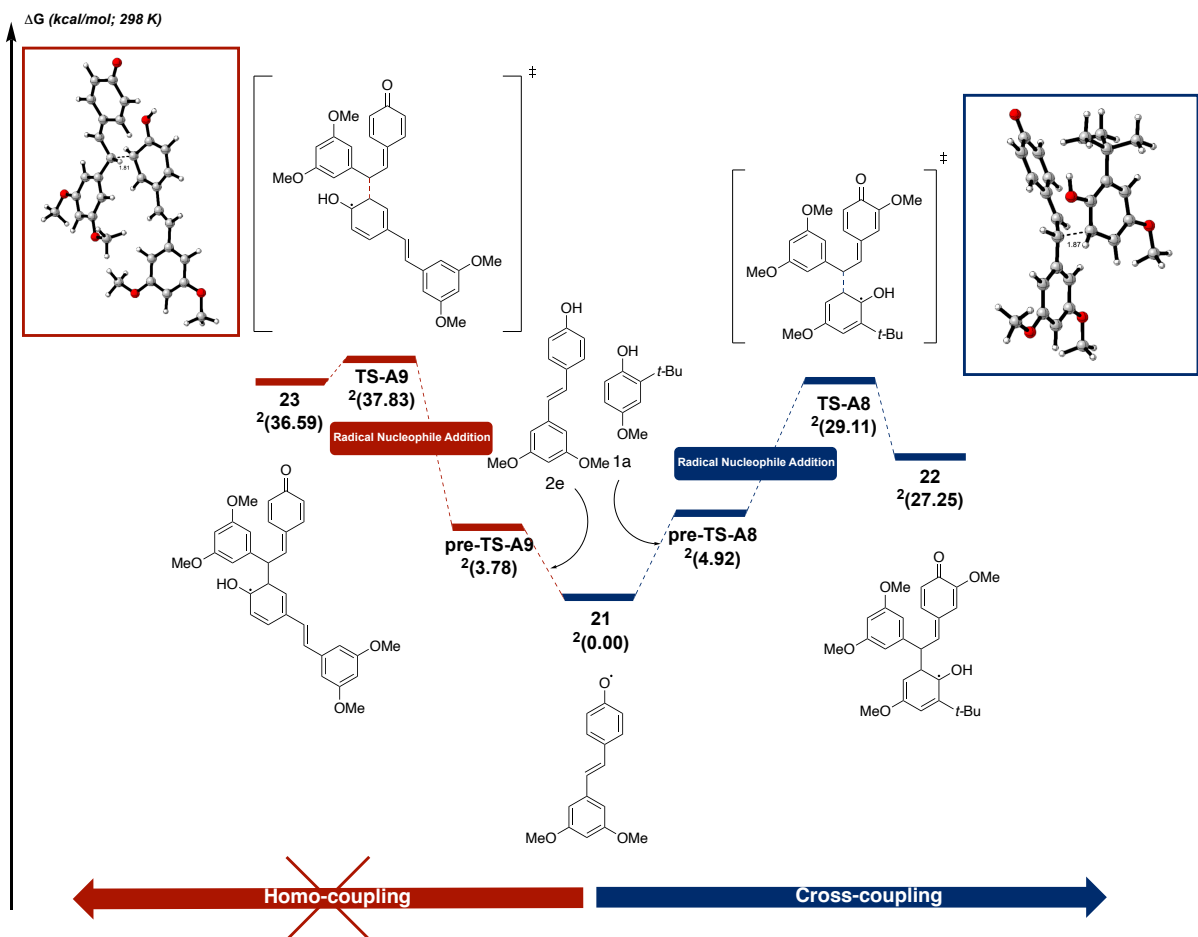

**Figure S32.** Partial PES on key coupling step and rationalizing the absence of **2e** homocoupling. Free energies were computed using UM06/6-311++G(d,p)-CPCM(HFIP)//UB3LYP-D3/6-31G(d,p).

## Calculated Structures and Energies

2a

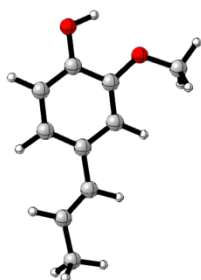

UB3LYP-D3/6-31G(d,p)

Zero-point correction= 0.198662 (Hartree/Particle)

Thermal correction to Energy= 0.210759

Thermal correction to Enthalpy= 0.211703

Thermal correction to Gibbs Free Energy= 0.159473

Sum of electronic and zero-point Energies= -538.548293

Sum of electronic and thermal Energies= -538.536196

Sum of electronic and thermal Enthalpies= -538.535252

Sum of electronic and thermal Free Energies= -538.587482

UM06/6-311++G(d,p)-CPCM(HFIP)//UB3LYP-D3/6-31G(d,p)

HF = -538.484241

1a

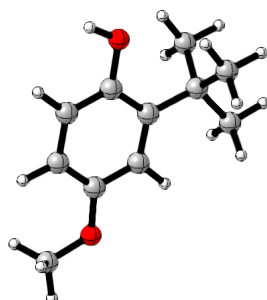

UB3LYP-D3/6-31G(d,p)

Zero-point correction= 0.250165 (Hartree/Particle)

Thermal correction to Energy= 0.263676

Thermal correction to Enthalpy= 0.264620

Thermal correction to Gibbs Free Energy= 0.212834

Sum of electronic and zero-point Energies= -579.015139

Sum of electronic and thermal Energies= -579.001627

Sum of electronic and thermal Enthalpies= -579.000683

Sum of electronic and thermal Free Energies= -579.053812

UM06/6-311++G(d,p)-CPCM(HFIP)//UB3LYP-D3/6-31G(d,p)

HF = -578.996099

int-6

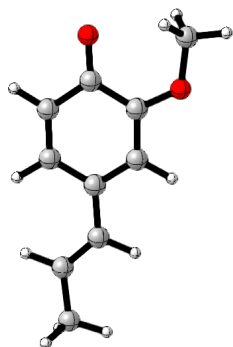

UB3LYP-D3/6-31G(d,p)

|                                              |                             |
|----------------------------------------------|-----------------------------|
| Zero-point correction=                       | 0.185826 (Hartree/Particle) |
| Thermal correction to Energy=                | 0.197644                    |
| Thermal correction to Enthalpy=              | 0.198588                    |
| Thermal correction to Gibbs Free Energy=     | 0.148040                    |
| Sum of electronic and zero-point Energies=   | -537.926917                 |
| Sum of electronic and thermal Energies=      | -537.915099                 |
| Sum of electronic and thermal Enthalpies=    | -537.914154                 |
| Sum of electronic and thermal Free Energies= | -537.965819                 |

UM06/6-311++G(d,p)-CPCM(HFIP)//UB3LYP-D3/6-31G(d,p)

HF = -537.847590

**Ti<sub>2</sub>O<sub>4</sub>**

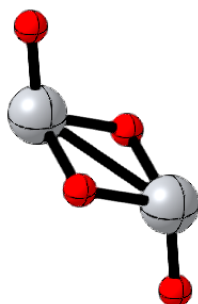

UB3LYP-D3/6-31G(d,p)-SDD(Ti)

|                                              |                             |
|----------------------------------------------|-----------------------------|
| Zero-point correction=                       | 0.014540 (Hartree/Particle) |
| Thermal correction to Energy=                | 0.020897                    |
| Thermal correction to Enthalpy=              | 0.021841                    |
| Thermal correction to Gibbs Free Energy=     | -0.017076                   |
| Sum of electronic and zero-point Energies=   | -417.818363                 |
| Sum of electronic and thermal Energies=      | -417.812006                 |
| Sum of electronic and thermal Enthalpies=    | -417.811062                 |
| Sum of electronic and thermal Free Energies= | -417.849979                 |

UM06/6-311++G(d,p)-SDD(Ti)-CPCM(HFIP)//UB3LYP-D3/6-31G(d,p)-SDD(Ti)

HF = -417.814017

**Ti<sub>4</sub>O<sub>8</sub>**



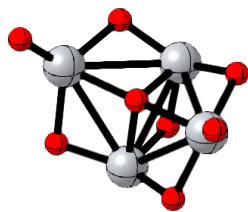

UB3LYP-D3/6-31G(d,p)

|                                              |                             |
|----------------------------------------------|-----------------------------|
| Zero-point correction=                       | 0.031730 (Hartree/Particle) |
| Thermal correction to Energy=                | 0.044460                    |
| Thermal correction to Enthalpy=              | 0.045404                    |
| Thermal correction to Gibbs Free Energy=     | -0.007563                   |
| Sum of electronic and zero-point Energies=   | -835.840254                 |
| Sum of electronic and thermal Energies=      | -835.827523                 |
| Sum of electronic and thermal Enthalpies=    | -835.826579                 |
| Sum of electronic and thermal Free Energies= | -835.879546                 |

UM06/6-311++G(d,p)-CPCM(HFIP)//UB3LYP-D3/6-31G(d,p)

HF = -835.4874204

**Ti<sub>4</sub>O<sub>8</sub>-2a**

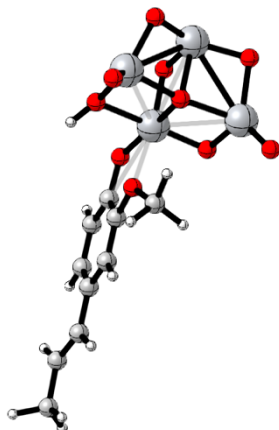

UB3LYP-D3/6-31G(d,p)

|                                              |                             |
|----------------------------------------------|-----------------------------|
| Zero-point correction=                       | 0.231054 (Hartree/Particle) |
| Thermal correction to Energy=                | 0.257479                    |
| Thermal correction to Enthalpy=              | 0.258423                    |
| Thermal correction to Gibbs Free Energy=     | 0.173603                    |
| Sum of electronic and zero-point Energies=   | -1374.491384                |
| Sum of electronic and thermal Energies=      | -1374.464959                |
| Sum of electronic and thermal Enthalpies=    | -1374.464015                |
| Sum of electronic and thermal Free Energies= | -1374.548834                |

UM06/6-311++G(d,p)-CPCM(HFIP)//UB3LYP-D3/6-31G(d,p)

HF = -1374.1931237

**•OOH**

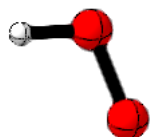

UB3LYP-D3/6-31G(d,p)

|                                              |                             |
|----------------------------------------------|-----------------------------|
| Zero-point correction=                       | 0.014091 (Hartree/Particle) |
| Thermal correction to Energy=                | 0.016948                    |
| Thermal correction to Enthalpy=              | 0.017892                    |
| Thermal correction to Gibbs Free Energy=     | -0.008097                   |
| Sum of electronic and zero-point Energies=   | -150.890004                 |
| Sum of electronic and thermal Energies=      | -150.887146                 |
| Sum of electronic and thermal Enthalpies=    | -150.886202                 |
| Sum of electronic and thermal Free Energies= | -150.912192                 |

UM06/6-311++G(d,p)-CPCM(HFIP)//UB3LYP-D3/6-31G(d,p)  
 HF = -150.882956

**H<sub>2</sub>O<sub>2</sub>**

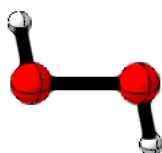

UB3LYP-D3/6-31G(d,p)

|                                              |                             |
|----------------------------------------------|-----------------------------|
| Zero-point correction=                       | 0.026370 (Hartree/Particle) |
| Thermal correction to Energy=                | 0.029631                    |
| Thermal correction to Enthalpy=              | 0.030575                    |
| Thermal correction to Gibbs Free Energy=     | 0.004029                    |
| Sum of electronic and zero-point Energies=   | -151.517176                 |
| Sum of electronic and thermal Energies=      | -151.513916                 |
| Sum of electronic and thermal Enthalpies=    | -151.512971                 |
| Sum of electronic and thermal Free Energies= | -151.539518                 |

UM06/6-311++G(d,p)-CPCM(HFIP)//UB3LYP-D3/6-31G(d,p)  
 HF = -151.529984

**int-4**

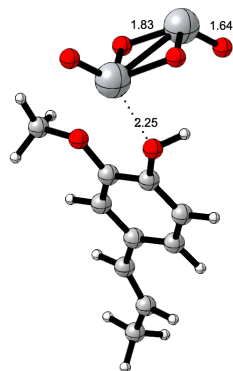

UB3LYP-D3/6-31G(d,p)-SDD(Ti)

|                        |                             |
|------------------------|-----------------------------|
| Zero-point correction= | 0.214958 (Hartree/Particle) |
|------------------------|-----------------------------|

|                                              |             |
|----------------------------------------------|-------------|
| Thermal correction to Energy=                | 0.234728    |
| Thermal correction to Enthalpy=              | 0.235672    |
| Thermal correction to Gibbs Free Energy=     | 0.163787    |
| Sum of electronic and zero-point Energies=   | -956.435360 |
| Sum of electronic and thermal Energies=      | -956.415590 |
| Sum of electronic and thermal Enthalpies=    | -956.414646 |
| Sum of electronic and thermal Free Energies= | -956.486531 |

UM06/6-311++G(d,p)-SDD(Ti)-CPCM(HFIP)//UB3LYP-D3/6-31G(d,p)-SDD(Ti)  
 HF = -956.321007

### TS-E1

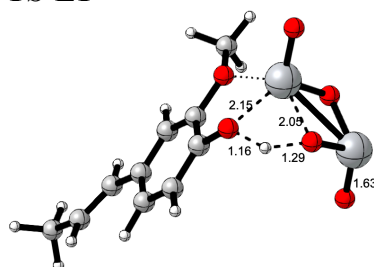

Imaginary frequency = -934.38 cm<sup>-1</sup>

|                                              |                             |
|----------------------------------------------|-----------------------------|
| UB3LYP-D3/6-31G(d,p)-SDD(Ti)                 |                             |
| Zero-point correction=                       | 0.210597 (Hartree/Particle) |
| Thermal correction to Energy=                | 0.229658                    |
| Thermal correction to Enthalpy=              | 0.230602                    |
| Thermal correction to Gibbs Free Energy=     | 0.160895                    |
| Sum of electronic and zero-point Energies=   | -956.435169                 |
| Sum of electronic and thermal Energies=      | -956.416108                 |
| Sum of electronic and thermal Enthalpies=    | -956.415164                 |
| Sum of electronic and thermal Free Energies= | -956.484871                 |

UM06/6-311++G(d,p)-SDD(Ti)-CPCM(HFIP)//UB3LYP-D3/6-31G(d,p)-SDD(Ti)  
 HF = -956.311439

### int-5

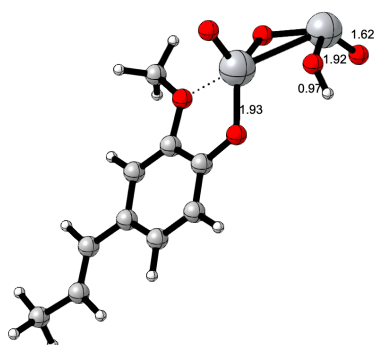

|                                          |                             |
|------------------------------------------|-----------------------------|
| UB3LYP-D3/6-31G(d,p)-SDD(Ti)             |                             |
| Zero-point correction=                   | 0.213583 (Hartree/Particle) |
| Thermal correction to Energy=            | 0.233736                    |
| Thermal correction to Enthalpy=          | 0.234680                    |
| Thermal correction to Gibbs Free Energy= | 0.161687                    |

Sum of electronic and zero-point Energies= -956.457805  
 Sum of electronic and thermal Energies= -956.437652  
 Sum of electronic and thermal Enthalpies= -956.436708  
 Sum of electronic and thermal Free Energies= -956.509701

UM06/6-311++G(d,p)-SDD(Ti)-CPCM(HFIP)//UB3LYP-D3/6-31G(d,p)-SDD(Ti)  
 HF = -956.346402

### pre-TS-A1

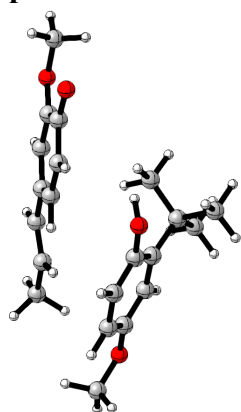

UB3LYP-D3/6-31G(d,p)  
 Zero-point correction= 0.438105 (Hartree/Particle)  
 Thermal correction to Energy= 0.465072  
 Thermal correction to Enthalpy= 0.466016  
 Thermal correction to Gibbs Free Energy= 0.386025  
 Sum of electronic and zero-point Energies= -1116.983573  
 Sum of electronic and thermal Energies= -1116.956606  
 Sum of electronic and thermal Enthalpies= -1116.955662  
 Sum of electronic and thermal Free Energies= -1117.041709

UM06/6-311++G(d,p)-CPCM(HFIP)//UB3LYP-D3/6-31G(d,p)  
 HF = -1116.850396

### TS-A1

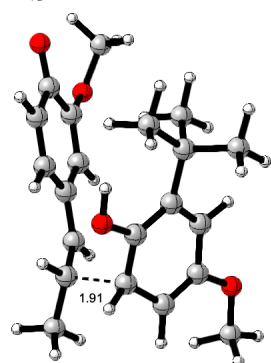

Imaginary frequency = -587.65 cm<sup>-1</sup>

UB3LYP-D3/6-31G(d,p)  
 Zero-point correction= 0.438281 (Hartree/Particle)  
 Thermal correction to Energy= 0.463862  
 Thermal correction to Enthalpy= 0.464806

Thermal correction to Gibbs Free Energy= 0.387501  
 Sum of electronic and zero-point Energies= -1116.935986  
 Sum of electronic and thermal Energies= -1116.910406  
 Sum of electronic and thermal Enthalpies= -1116.909462  
 Sum of electronic and thermal Free Energies= -1116.990990

UM06/6-311++G(d,p)-CPCM(HFIP)//UB3LYP-D3/6-31G(d,p)  
 HF = -1116.812857

**int-7**

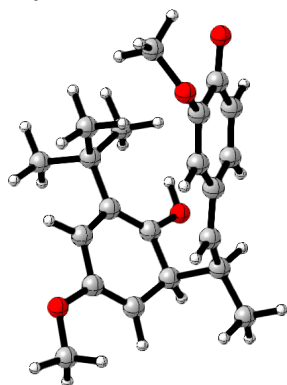

UB3LYP-D3/6-31G(d,p)  
 Zero-point correction= 0.439923 (Hartree/Particle)  
 Thermal correction to Energy= 0.465708  
 Thermal correction to Enthalpy= 0.466652  
 Thermal correction to Gibbs Free Energy= 0.38909  
 Sum of electronic and zero-point Energies= -1116.940648  
 Sum of electronic and thermal Energies= -1116.914864  
 Sum of electronic and thermal Enthalpies= -1116.913920  
 Sum of electronic and thermal Free Energies= -1116.996210

UM06/6-311++G(d,p)-CPCM(HFIP)//UB3LYP-D3/6-31G(d,p)  
 HF = -1116.821314

**TS-B1-s**

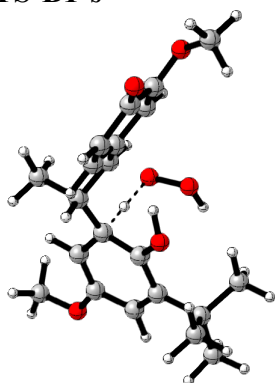

Imaginary frequency =  $-595.02\text{cm}^{-1}$

UB3LYP-D3/6-31G(d,p)  
 Zero-point correction= 0.453841 (Hartree/Particle)  
 Thermal correction to Energy= 0.482469

Thermal correction to Enthalpy= 0.483413  
 Thermal correction to Gibbs Free Energy= 0.394187  
 Sum of electronic and zero-point Energies= -1267.880090  
 Sum of electronic and thermal Energies= -1267.851462  
 Sum of electronic and thermal Enthalpies= -1267.850517  
 Sum of electronic and thermal Free Energies= -1267.939743

UM06/6-311++G(d,p)-CPCM(HFIP)//UB3LYP-D3/6-31G(d,p)  
 HF = -1267.7483206

### TS-B1-t

UB3LYP-D3/6-31G(d,p)  
 Zero-point correction= 0.451444 (Hartree/Particle)  
 Thermal correction to Energy= 0.479021  
 Thermal correction to Enthalpy= 0.479965  
 Thermal correction to Gibbs Free Energy= 0.393262  
 Sum of electronic and zero-point Energies= -1267.827176  
 Sum of electronic and thermal Energies= -1267.799600  
 Sum of electronic and thermal Enthalpies= -1267.798656  
 Sum of electronic and thermal Free Energies= -1267.885359

UM06/6-311++G(d,p)-CPCM(HFIP)//UB3LYP-D3/6-31G(d,p)  
 HF = -1267.6877021

### int-8

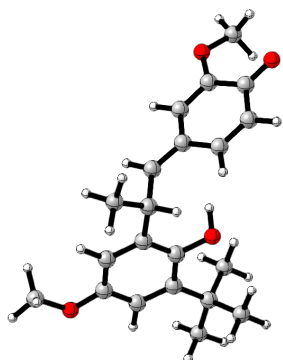

UB3LYP-D3/6-31G(d,p)  
 Zero-point correction= 0.430055 (Hartree/Particle)  
 Thermal correction to Energy= 0.455570  
 Thermal correction to Enthalpy= 0.456514  
 Thermal correction to Gibbs Free Energy= 0.374225  
 Sum of electronic and zero-point Energies= -1116.395998  
 Sum of electronic and thermal Energies= -1116.370484  
 Sum of electronic and thermal Enthalpies= -1116.369540  
 Sum of electronic and thermal Free Energies= -1116.451828

UM06/6-311++G(d,p)-CPCM(HFIP)//UB3LYP-D3/6-31G(d,p)  
 HF = -1116.263723

### int-9

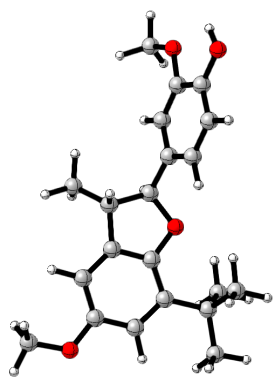

UB3LYP-D3/6-31G(d,p)

|                                              |                             |
|----------------------------------------------|-----------------------------|
| Zero-point correction=                       | 0.432395 (Hartree/Particle) |
| Thermal correction to Energy=                | 0.456890                    |
| Thermal correction to Enthalpy=              | 0.457834                    |
| Thermal correction to Gibbs Free Energy=     | 0.378106                    |
| Sum of electronic and zero-point Energies=   | -1116.432513                |
| Sum of electronic and thermal Energies=      | -1116.408018                |
| Sum of electronic and thermal Enthalpies=    | -1116.407074                |
| Sum of electronic and thermal Free Energies= | -1116.486801                |

UM06/6-311++G(d,p)-CPCM(HFIP)//UB3LYP-D3/6-31G(d,p)

HF = -1116.303689

### pre-TS-A5

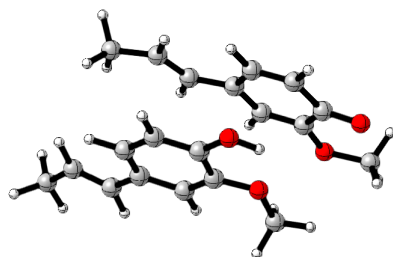

UB3LYP-D3/6-31G(d,p)

|                                              |                             |
|----------------------------------------------|-----------------------------|
| Zero-point correction=                       | 0.385594 (Hartree/Particle) |
| Thermal correction to Energy=                | 0.411391                    |
| Thermal correction to Enthalpy=              | 0.412336                    |
| Thermal correction to Gibbs Free Energy=     | 0.333919                    |
| Sum of electronic and zero-point Energies=   | -1076.495114                |
| Sum of electronic and thermal Energies=      | -1076.469316                |
| Sum of electronic and thermal Enthalpies=    | -1076.468372                |
| Sum of electronic and thermal Free Energies= | -1076.554290                |

UM06/6-311++G(d,p)-CPCM(HFIP)//UB3LYP-D3/6-31G(d,p)

HF = -1076.346385

### TS-A5



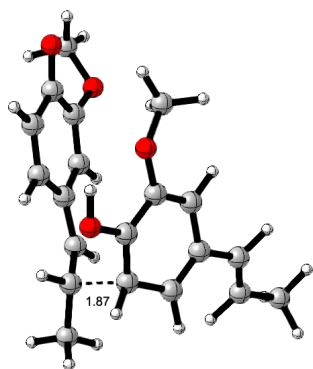

Imaginary frequency =  $-539.06 \text{ cm}^{-1}$

UB3LYP-D3/6-31G(d,p)

|                                              |                             |
|----------------------------------------------|-----------------------------|
| Zero-point correction=                       | 0.385865 (Hartree/Particle) |
| Thermal correction to Energy=                | 0.410290                    |
| Thermal correction to Enthalpy=              | 0.411235                    |
| Thermal correction to Gibbs Free Energy=     | 0.328808                    |
| Sum of electronic and zero-point Energies=   | -1076.443474                |
| Sum of electronic and thermal Energies=      | -1076.419049                |
| Sum of electronic and thermal Enthalpies=    | -1076.418105                |
| Sum of electronic and thermal Free Energies= | -1076.499532                |

UM06/6-311++G(d,p)-CPCM(HFIP)//UB3LYP-D3/6-31G(d,p)  
 HF = -1076.301171

**int-10**

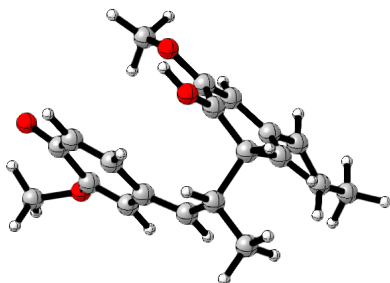

UB3LYP-D3/6-31G(d,p)

|                                              |                             |
|----------------------------------------------|-----------------------------|
| Zero-point correction=                       | 0.387257 (Hartree/Particle) |
| Thermal correction to Energy=                | 0.411896                    |
| Thermal correction to Enthalpy=              | 0.412840                    |
| Thermal correction to Gibbs Free Energy=     | 0.330815                    |
| Sum of electronic and zero-point Energies=   | -1076.445492                |
| Sum of electronic and thermal Energies=      | -1076.420853                |
| Sum of electronic and thermal Enthalpies=    | -1076.419908                |
| Sum of electronic and thermal Free Energies= | -1076.501934                |

UM06/6-311++G(d,p)-CPCM(HFIP)//UB3LYP-D3/6-31G(d,p)  
 HF = -1076.306435

**TS-B2-s**

Imaginary frequency =  $-560.12 \text{ cm}^{-1}$

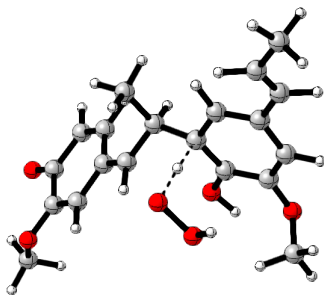

UB3LYP-D3/6-31G(d,p)  
 Zero-point correction= 0.401163 (Hartree/Particle)  
 Thermal correction to Energy= 0.428831  
 Thermal correction to Enthalpy= 0.429776  
 Thermal correction to Gibbs Free Energy= 0.340375  
 Sum of electronic and zero-point Energies= -1227.376378  
 Sum of electronic and thermal Energies= -1227.348709  
 Sum of electronic and thermal Enthalpies= -1227.347765  
 Sum of electronic and thermal Free Energies= -1227.437165

UM06/6-311++G(d,p)-CPCM(HFIP)//UB3LYP-D3/6-31G(d,p)  
 HF = -1227.2325628

#### TS-B2-t

UB3LYP-D3/6-31G(d,p)  
 Zero-point correction= 0.398508 (Hartree/Particle)  
 Thermal correction to Energy= 0.425397  
 Thermal correction to Enthalpy= 0.426341  
 Thermal correction to Gibbs Free Energy= 0.338627  
 Sum of electronic and zero-point Energies= -1227.325122  
 Sum of electronic and thermal Energies= -1227.298233  
 Sum of electronic and thermal Enthalpies= -1227.297289  
 Sum of electronic and thermal Free Energies= -1227.385004

UM06/6-311++G(d,p)-CPCM(HFIP)//UB3LYP-D3/6-31G(d,p)  
 HF = -1227.173523

#### int-11

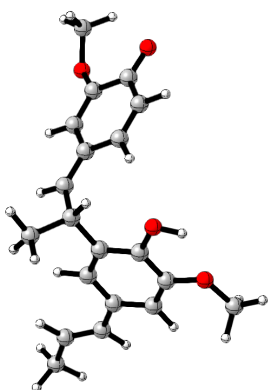

UB3LYP-D3/6-31G(d,p)  
 Zero-point correction= 0.377937 (Hartree/Particle)

|                                              |              |
|----------------------------------------------|--------------|
| Thermal correction to Energy=                | 0.402381     |
| Thermal correction to Enthalpy=              | 0.403325     |
| Thermal correction to Gibbs Free Energy=     | 0.320551     |
| Sum of electronic and zero-point Energies=   | -1075.902672 |
| Sum of electronic and thermal Energies=      | -1075.878228 |
| Sum of electronic and thermal Enthalpies=    | -1075.877283 |
| Sum of electronic and thermal Free Energies= | -1075.960058 |

UM06/6-311++G(d,p)-CPCM(HFIP)//UB3LYP-D3/6-31G(d,p)  
 HF = -1075.756110

### int-12

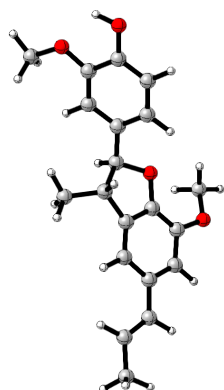

|                                              |                             |
|----------------------------------------------|-----------------------------|
| UB3LYP-D3/6-31G(d,p)                         |                             |
| Zero-point correction=                       | 0.379720 (Hartree/Particle) |
| Thermal correction to Energy=                | 0.403182                    |
| Thermal correction to Enthalpy=              | 0.404126                    |
| Thermal correction to Gibbs Free Energy=     | 0.324601                    |
| Sum of electronic and zero-point Energies=   | -1075.929012                |
| Sum of electronic and thermal Energies=      | -1075.905550                |
| Sum of electronic and thermal Enthalpies=    | -1075.904606                |
| Sum of electronic and thermal Free Energies= | -1075.984131                |

UM06/6-311++G(d,p)-CPCM(HFIP)//UB3LYP-D3/6-31G(d,p)  
 HF = -1075.785349

### int-21

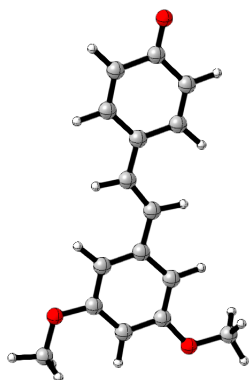

|                        |                             |
|------------------------|-----------------------------|
| UB3LYP-D3/6-31G(d,p)   |                             |
| Zero-point correction= | 0.271472 (Hartree/Particle) |

|                                              |             |
|----------------------------------------------|-------------|
| Thermal correction to Energy=                | 0.288835    |
| Thermal correction to Enthalpy=              | 0.289779    |
| Thermal correction to Gibbs Free Energy=     | 0.223681    |
| Sum of electronic and zero-point Energies=   | -844.121640 |
| Sum of electronic and thermal Energies=      | -844.104277 |
| Sum of electronic and thermal Enthalpies=    | -844.103333 |
| Sum of electronic and thermal Free Energies= | -844.169431 |

UM06/6-311++G(d,p)-CPCM(HFIP)//UB3LYP-D3/6-31G(d,p)  
 HF = -843.983940

### pre-TS-A8

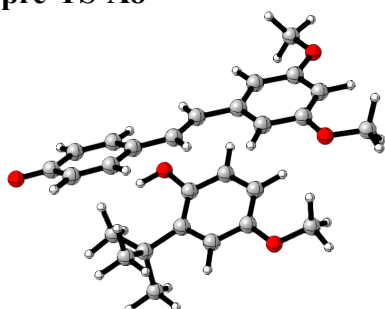

|                                              |                             |
|----------------------------------------------|-----------------------------|
| UB3LYP-D3/6-31G(d,p)                         |                             |
| Zero-point correction=                       | 0.523690 (Hartree/Particle) |
| Thermal correction to Energy=                | 0.556318                    |
| Thermal correction to Enthalpy=              | 0.557262                    |
| Thermal correction to Gibbs Free Energy=     | 0.453194                    |
| Sum of electronic and zero-point Energies=   | -1423.179031                |
| Sum of electronic and thermal Energies=      | -1423.146404                |
| Sum of electronic and thermal Enthalpies=    | -1423.145459                |
| Sum of electronic and thermal Free Energies= | -1423.245018                |

UM06/6-311++G(d,p)-CPCM(HFIP)//UB3LYP-D3/6-31G(d,p)  
 HF = -1422.988881

### TS-A8

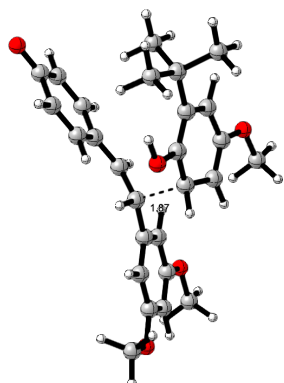

Imaginary frequency = -482.89 cm<sup>-1</sup>

|                               |                             |
|-------------------------------|-----------------------------|
| UB3LYP-D3/6-31G(d,p)          |                             |
| Zero-point correction=        | 0.524294 (Hartree/Particle) |
| Thermal correction to Energy= | 0.555497                    |

Thermal correction to Enthalpy= 0.556441  
 Thermal correction to Gibbs Free Energy= 0.453085  
 Sum of electronic and zero-point Energies= -1423.133919  
 Sum of electronic and thermal Energies= -1423.102717  
 Sum of electronic and thermal Enthalpies= -1423.101772  
 Sum of electronic and thermal Free Energies= -1423.196762

UM06/6-311++G(d,p)-CPCM(HFIP)//UB3LYP-D3/6-31G(d,p)  
 HF = -1422.950211

### int-22

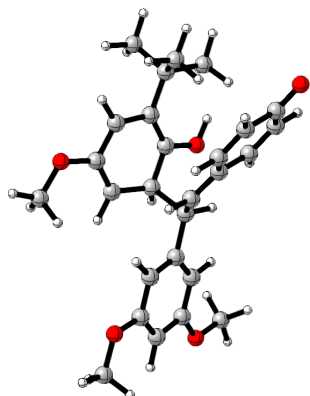

UB3LYP-D3/6-31G(d,p)  
 Zero-point correction= 0.525516 (Hartree/Particle)  
 Thermal correction to Energy= 0.557000  
 Thermal correction to Enthalpy= 0.557944  
 Thermal correction to Gibbs Free Energy= 0.454195  
 Sum of electronic and zero-point Energies= -1423.135216  
 Sum of electronic and thermal Energies= -1423.103732  
 Sum of electronic and thermal Enthalpies= -1423.102788  
 Sum of electronic and thermal Free Energies= -1423.198602

UM06/6-311++G(d,p)-CPCM(HFIP)//UB3LYP-D3/6-31G(d,p)  
 HF = -1422.954294

### pre-TS-A9

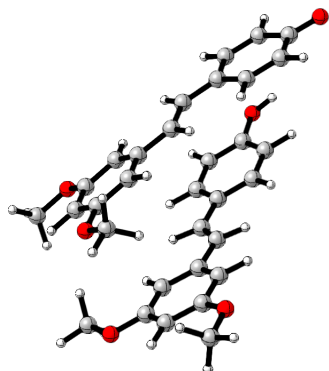

UB3LYP-D3/6-31G(d,p)  
 Zero-point correction= 0.557806 (Hartree/Particle)  
 Thermal correction to Energy= 0.594395  
 Thermal correction to Enthalpy= 0.595339

|                                              |              |
|----------------------------------------------|--------------|
| Thermal correction to Gibbs Free Energy=     | 0.486274     |
| Sum of electronic and zero-point Energies=   | -1688.896351 |
| Sum of electronic and thermal Energies=      | -1688.859761 |
| Sum of electronic and thermal Enthalpies=    | -1688.858817 |
| Sum of electronic and thermal Free Energies= | -1688.967882 |

UM06/6-311++G(d,p)-CPCM(HFIP)//UB3LYP-D3/6-31G(d,p)  
 HF = -1688.621164

**TS-A9**

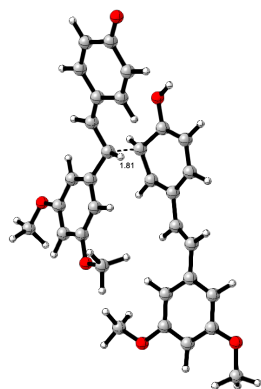

Imaginary frequency =  $-395.97 \text{ cm}^{-1}$

|                                              |                             |
|----------------------------------------------|-----------------------------|
| UB3LYP-D3/6-31G(d,p)                         |                             |
| Zero-point correction=                       | 0.558290 (Hartree/Particle) |
| Thermal correction to Energy=                | 0.593577                    |
| Thermal correction to Enthalpy=              | 0.594521                    |
| Thermal correction to Gibbs Free Energy=     | 0.488955                    |
| Sum of electronic and zero-point Energies=   | -1688.837269                |
| Sum of electronic and thermal Energies=      | -1688.801983                |
| Sum of electronic and thermal Enthalpies=    | -1688.801038                |
| Sum of electronic and thermal Free Energies= | -1688.906605                |

UM06/6-311++G(d,p)-CPCM(HFIP)//UB3LYP-D3/6-31G(d,p)  
 HF = -1688.568011

**int-23**

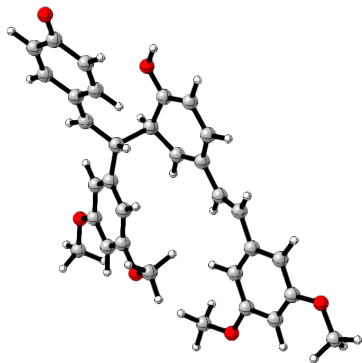

|                               |                             |
|-------------------------------|-----------------------------|
| UB3LYP-D3/6-31G(d,p)          |                             |
| Zero-point correction=        | 0.557806 (Hartree/Particle) |
| Thermal correction to Energy= | 0.594395                    |

Thermal correction to Enthalpy= 0.595339  
 Thermal correction to Gibbs Free Energy= 0.486274  
 Sum of electronic and zero-point Energies= -1688.896351  
 Sum of electronic and thermal Energies= -1688.859761  
 Sum of electronic and thermal Enthalpies= -1688.858817  
 Sum of electronic and thermal Free Energies= -1688.967882

UM06/6-311++G(d,p)-CPCM(HFIP)//UB3LYP-D3/6-31G(d,p)  
 HF = -1688.570017

### int-13

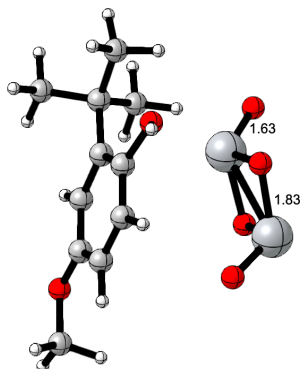

UB3LYP-D3/6-31G(d,p)-SDD(Ti)  
 Zero-point correction= 0.267205 (Hartree/Particle)  
 Thermal correction to Energy= 0.288313  
 Thermal correction to Enthalpy= 0.289258  
 Thermal correction to Gibbs Free Energy= 0.215413  
 Sum of electronic and zero-point Energies= -996.911051  
 Sum of electronic and thermal Energies= -996.889943  
 Sum of electronic and thermal Enthalpies= -996.888998  
 Sum of electronic and thermal Free Energies= -996.962843

UM06/6-311++G(d,p)-SDD(Ti)-CPCM(HFIP)//UB3LYP-D3/6-31G(d,p)-SDD(Ti)  
 HF = -996.815497

### TS-E2

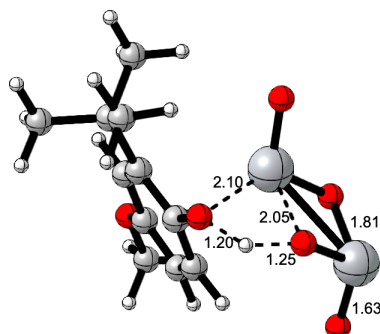

Imaginary frequency = -1134.89 cm<sup>-1</sup>

UB3LYP-D3/6-31G(d,p)-SDD(Ti)  
 Zero-point correction= 0.262902 (Hartree/Particle)  
 Thermal correction to Energy= 0.283215



|                                              |             |
|----------------------------------------------|-------------|
| Thermal correction to Enthalpy=              | 0.284159    |
| Thermal correction to Gibbs Free Energy=     | 0.213848    |
| Sum of electronic and zero-point Energies=   | -996.902460 |
| Sum of electronic and thermal Energies=      | -996.882148 |
| Sum of electronic and thermal Enthalpies=    | -996.881203 |
| Sum of electronic and thermal Free Energies= | -996.951514 |

UM06/6-311++G(d,p)-SDD(Ti)-CPCM(HFIP)//UB3LYP-D3/6-31G(d,p)-SDD(Ti)  
 HF = -996.798051

**int-14**

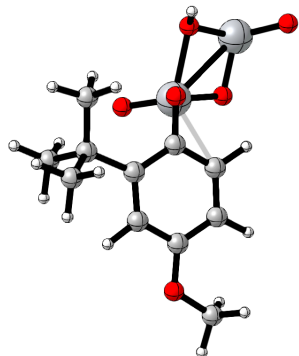

|                                              |                             |
|----------------------------------------------|-----------------------------|
| UB3LYP-D3/6-31G(d,p)-SDD(Ti)                 |                             |
| Zero-point correction=                       | 0.265696 (Hartree/Particle) |
| Thermal correction to Energy=                | 0.287094                    |
| Thermal correction to Enthalpy=              | 0.288038                    |
| Thermal correction to Gibbs Free Energy=     | 0.213668                    |
| Sum of electronic and zero-point Energies=   | -996.925652                 |
| Sum of electronic and thermal Energies=      | -996.904254                 |
| Sum of electronic and thermal Enthalpies=    | -996.903310                 |
| Sum of electronic and thermal Free Energies= | -996.977680                 |

UM06/6-311++G(d,p)-SDD(Ti)-CPCM(HFIP)//UB3LYP-D3/6-31G(d,p)-SDD(Ti)  
 HF = -996.833382

**int-15**

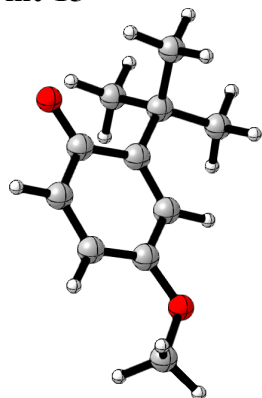

|                                 |                             |
|---------------------------------|-----------------------------|
| UB3LYP-D3/6-31G(d,p)            |                             |
| Zero-point correction=          | 0.238359 (Hartree/Particle) |
| Thermal correction to Energy=   | 0.251338                    |
| Thermal correction to Enthalpy= | 0.252282                    |

Thermal correction to Gibbs Free Energy= 0.199406  
 Sum of electronic and zero-point Energies= -578.424040  
 Sum of electronic and thermal Energies= -578.411061  
 Sum of electronic and thermal Enthalpies= -578.410117  
 Sum of electronic and thermal Free Energies= -578.462993

UM06/6-311++G(d,p)-CPCM(HFIP)//UB3LYP-D3/6-31G(d,p)  
 HF = -578.365271

### pre-TS-A4

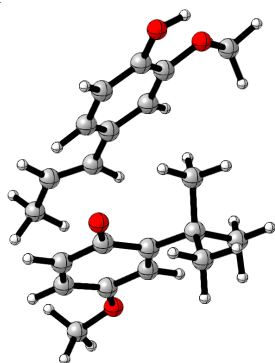

UB3LYP-D3/6-31G(d,p)  
 Zero-point correction= 0.438228 (Hartree/Particle)  
 Thermal correction to Energy= 0.465217  
 Thermal correction to Enthalpy= 0.466161  
 Thermal correction to Gibbs Free Energy= 0.378839  
 Sum of electronic and zero-point Energies= -1116.984895  
 Sum of electronic and thermal Energies= -1116.957906  
 Sum of electronic and thermal Enthalpies= -1116.956962  
 Sum of electronic and thermal Free Energies= -1117.044284

UM06/6-311++G(d,p)-CPCM(HFIP)//UB3LYP-D3/6-31G(d,p)  
 HF = -1116.859008

### TS-A4

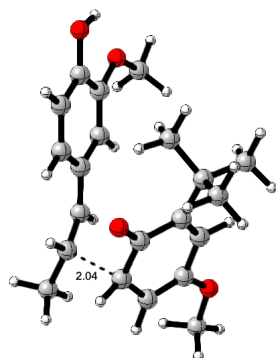

Imaginary frequency = -568.47 cm<sup>-1</sup>

UB3LYP-D3/6-31G(d,p)  
 Zero-point correction= 0.438694 (Hartree/Particle)  
 Thermal correction to Energy= 0.464093  
 Thermal correction to Enthalpy= 0.465037

|                                              |              |
|----------------------------------------------|--------------|
| Thermal correction to Gibbs Free Energy=     | 0.383451     |
| Sum of electronic and zero-point Energies=   | -1116.955458 |
| Sum of electronic and thermal Energies=      | -1116.930059 |
| Sum of electronic and thermal Enthalpies=    | -1116.929115 |
| Sum of electronic and thermal Free Energies= | -1117.010701 |

UM06/6-311++G(d,p)-CPCM(HFIP)//UB3LYP-D3/6-31G(d,p)  
 HF = -1116.830831

### int-16

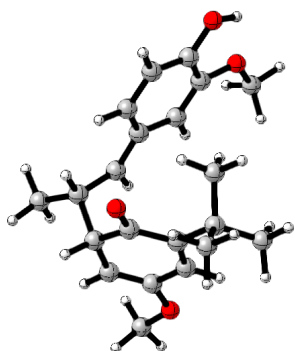

|                                              |                             |
|----------------------------------------------|-----------------------------|
| UB3LYP-D3/6-31G(d,p)                         |                             |
| Zero-point correction=                       | 0.440608 (Hartree/Particle) |
| Thermal correction to Energy=                | 0.466135                    |
| Thermal correction to Enthalpy=              | 0.467079                    |
| Thermal correction to Gibbs Free Energy=     | 0.385143                    |
| Sum of electronic and zero-point Energies=   | -1116.970289                |
| Sum of electronic and thermal Energies=      | -1116.944762                |
| Sum of electronic and thermal Enthalpies=    | -1116.943818                |
| Sum of electronic and thermal Free Energies= | -1117.025754                |

UM06/6-311++G(d,p)-CPCM(HFIP)//UB3LYP-D3/6-31G(d,p)  
 HF = -1116.850975

### int-17

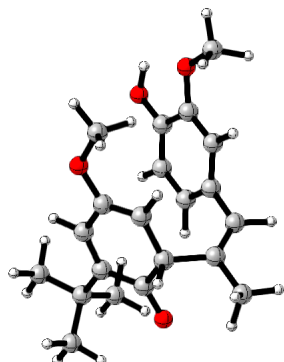

|                                            |                             |
|--------------------------------------------|-----------------------------|
| UB3LYP-D3/6-31G(d,p)                       |                             |
| Zero-point correction=                     | 0.429698 (Hartree/Particle) |
| Thermal correction to Energy=              | 0.454970                    |
| Thermal correction to Enthalpy=            | 0.455914                    |
| Thermal correction to Gibbs Free Energy=   | 0.375102                    |
| Sum of electronic and zero-point Energies= | -1116.395334                |

Sum of electronic and thermal Energies= -1116.370062  
Sum of electronic and thermal Enthalpies= -1116.369118  
Sum of electronic and thermal Free Energies= -1116.449930

UM06/6-311++G(d,p)-CPCM(HFIP)//UB3LYP-D3/6-31G(d,p)  
HF = -1116.267493

### pre-TS-A6

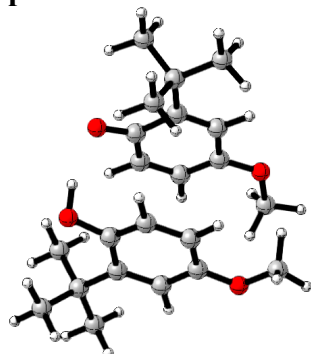

UB3LYP-D3/6-31G(d,p)  
Zero-point correction= 0.491753 (Hartree/Particle)  
Thermal correction to Energy= 0.519047  
Thermal correction to Enthalpy= 0.519991  
Thermal correction to Gibbs Free Energy= 0.436412  
Sum of electronic and zero-point Energies= -1157.494038  
Sum of electronic and thermal Energies= -1157.466745  
Sum of electronic and thermal Enthalpies= -1157.465801  
Sum of electronic and thermal Free Energies= -1157.549379

UM06/6-311++G(d,p)-CPCM(HFIP)//UB3LYP-D3/6-31G(d,p)  
HF = -1157.378652

### TS-A6

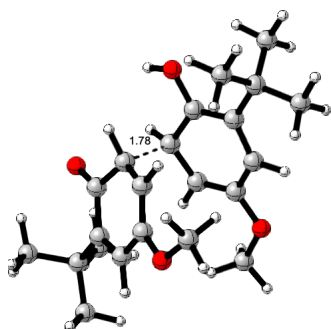

Imaginary frequency = -289.14 cm<sup>-1</sup>

UB3LYP-D3/6-31G(d,p)  
Zero-point correction= 0.490282 (Hartree/Particle)  
Thermal correction to Energy= 0.517373  
Thermal correction to Enthalpy= 0.518317  
Thermal correction to Gibbs Free Energy= 0.434242  
Sum of electronic and zero-point Energies= -1157.439528  
Sum of electronic and thermal Energies= -1157.412437  
Sum of electronic and thermal Enthalpies= -1157.411493

Sum of electronic and thermal Free Energies= -1157.495568

UM06/6-311++G(d,p)-CPCM(HFIP)//UB3LYP-D3/6-31G(d,p)

HF = -1157.334841

### int-18

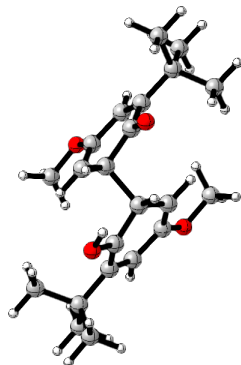

UB3LYP-D3/6-31G(d,p)

Zero-point correction= 0.490999 (Hartree/Particle)

Thermal correction to Energy= 0.518509

Thermal correction to Enthalpy= 0.519453

Thermal correction to Gibbs Free Energy= 0.434211

Sum of electronic and zero-point Energies= -1157.439053

Sum of electronic and thermal Energies= -1157.411544

Sum of electronic and thermal Enthalpies= -1157.410599

Sum of electronic and thermal Free Energies= -1157.495842

UM06/6-311++G(d,p)-CPCM(HFIP)//UB3LYP-D3/6-31G(d,p)

HF = -1157.335855

### int-19

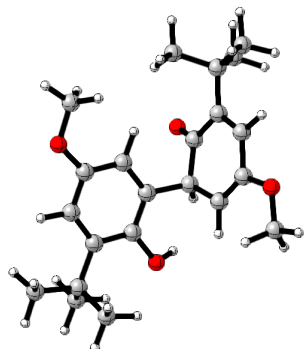

UB3LYP-D3/6-31G(d,p)

Zero-point correction= 0.481355 (Hartree/Particle)

Thermal correction to Energy= 0.508507

Thermal correction to Enthalpy= 0.509451

Thermal correction to Gibbs Free Energy= 0.425581

Sum of electronic and zero-point Energies= -1156.886819

Sum of electronic and thermal Energies= -1156.859668

Sum of electronic and thermal Enthalpies= -1156.858724

Sum of electronic and thermal Free Energies= -1156.942593

UM06/6-311++G(d,p)-CPCM(HFIP)//UB3LYP-D3/6-31G(d,p)  
HF = -1156.774528

### int-20

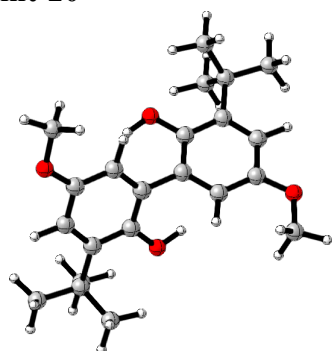

UB3LYP-D3/6-31G(d,p)  
Zero-point correction= 0.482265 (Hartree/Particle)  
Thermal correction to Energy= 0.509268  
Thermal correction to Enthalpy= 0.510213  
Thermal correction to Gibbs Free Energy= 0.426757  
Sum of electronic and zero-point Energies= -1156.921528  
Sum of electronic and thermal Energies= -1156.894524  
Sum of electronic and thermal Enthalpies= -1156.893580  
Sum of electronic and thermal Free Energies= -1156.977035

UM06/6-311++G(d,p)-CPCM(HFIP)//UB3LYP-D3/6-31G(d,p)  
HF = -1156.805372

### $\beta$ - $\beta$ adduct

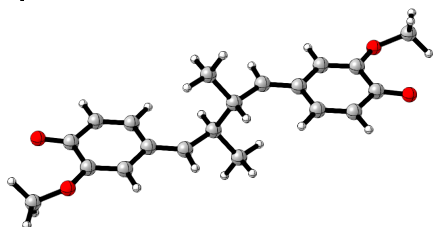

UB3LYP-D3/6-31G(d,p)  
Zero-point correction= 0.377721 (Hartree/Particle)  
Thermal correction to Energy= 0.401949  
Thermal correction to Enthalpy= 0.402893  
Thermal correction to Gibbs Free Energy= 0.320068  
Sum of electronic and zero-point Energies= -1075.879468  
Sum of electronic and thermal Energies= -1075.855240  
Sum of electronic and thermal Enthalpies= -1075.854296  
Sum of electronic and thermal Free Energies= -1075.937121

UM06/6-311++G(d,p)-CPCM(HFIP)//UB3LYP-D3/6-31G(d,p)  
HF = -1075.734484

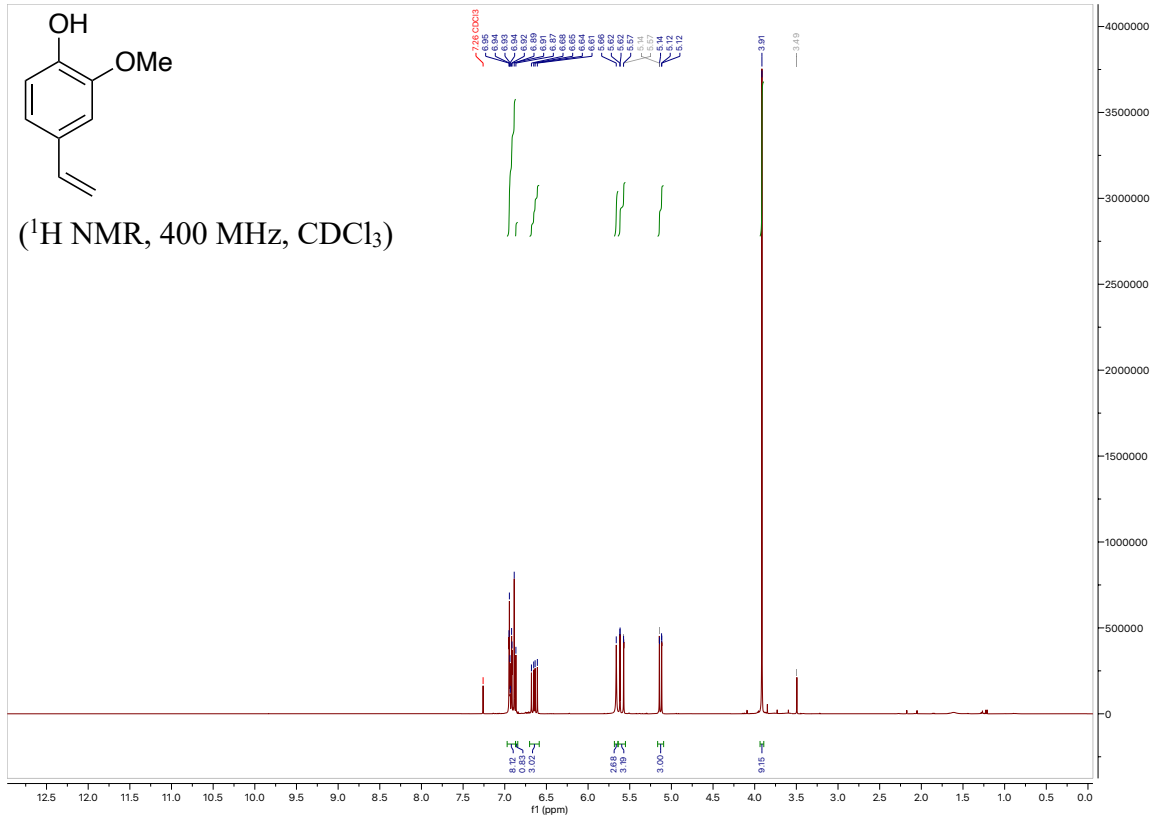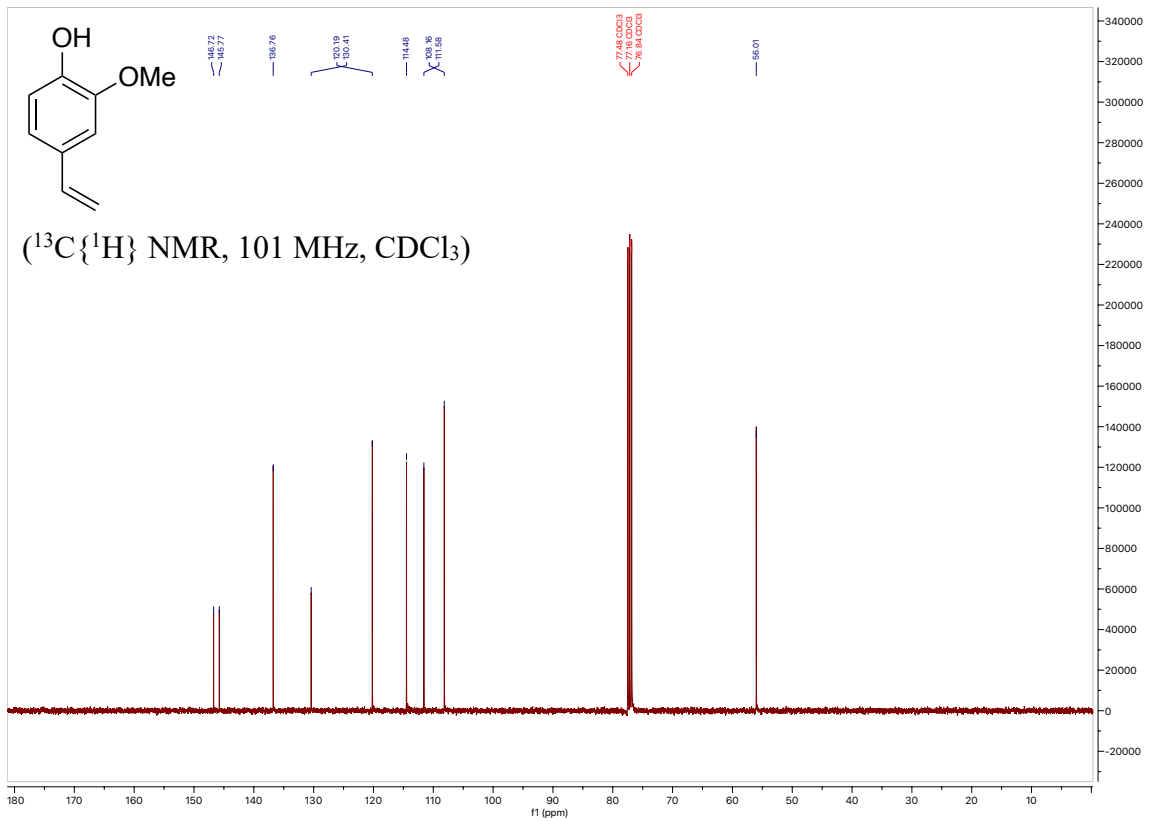

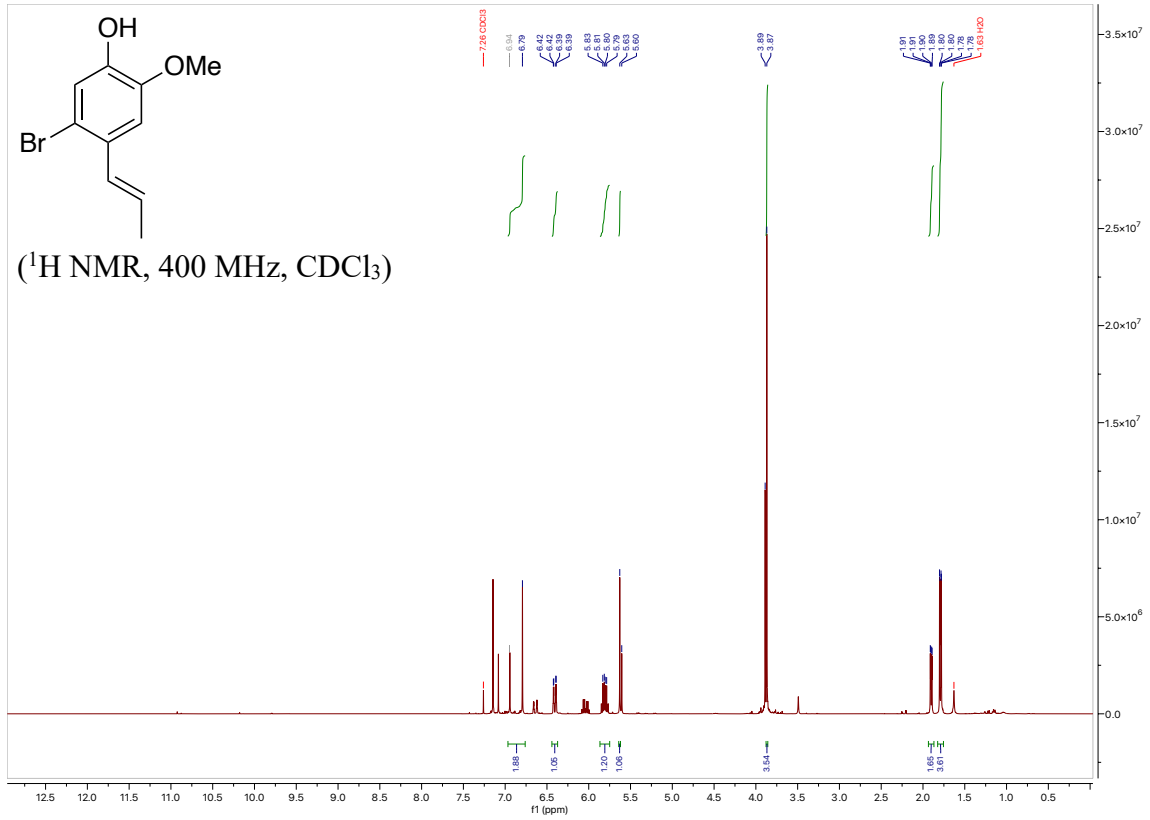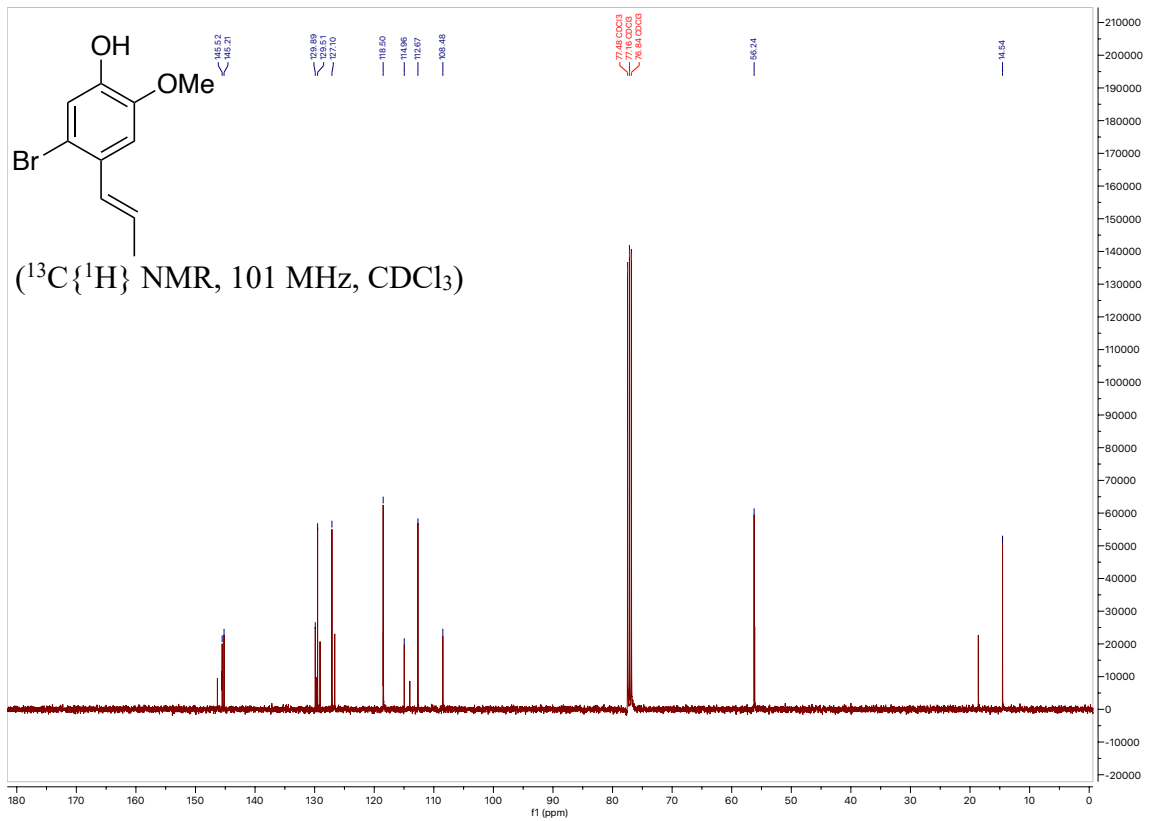



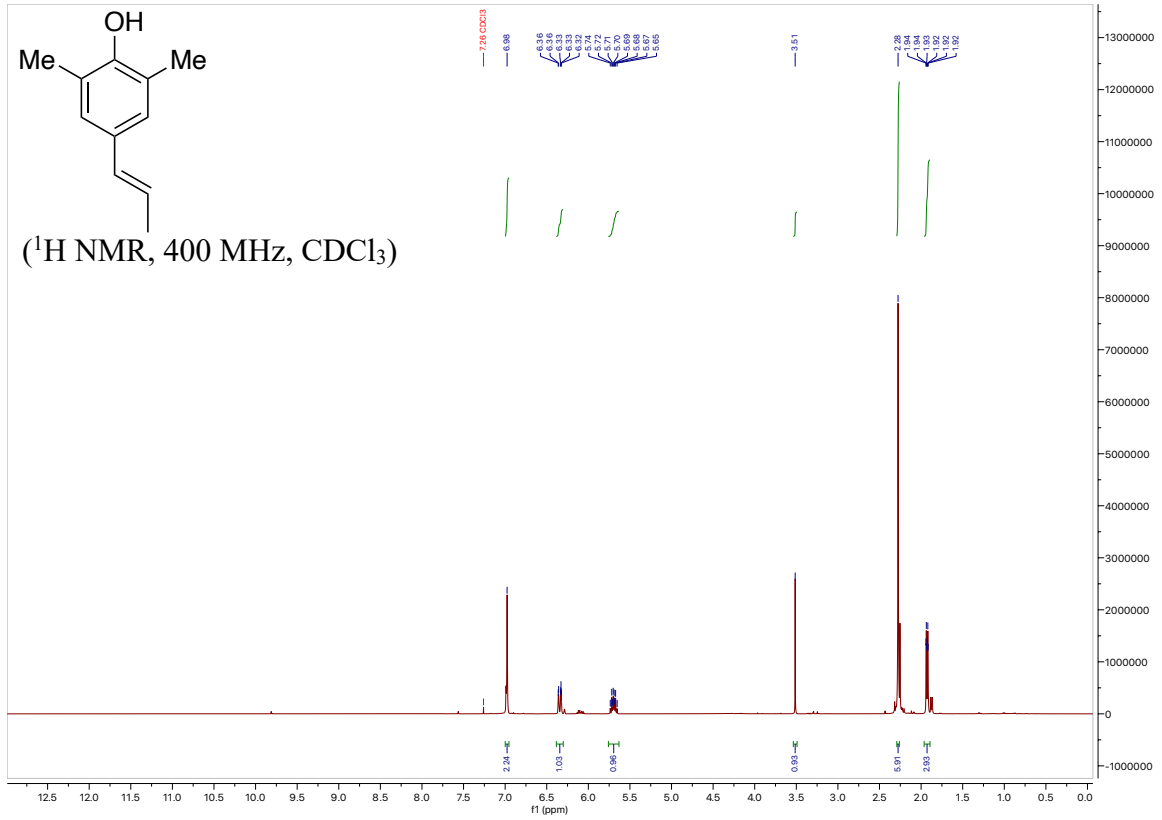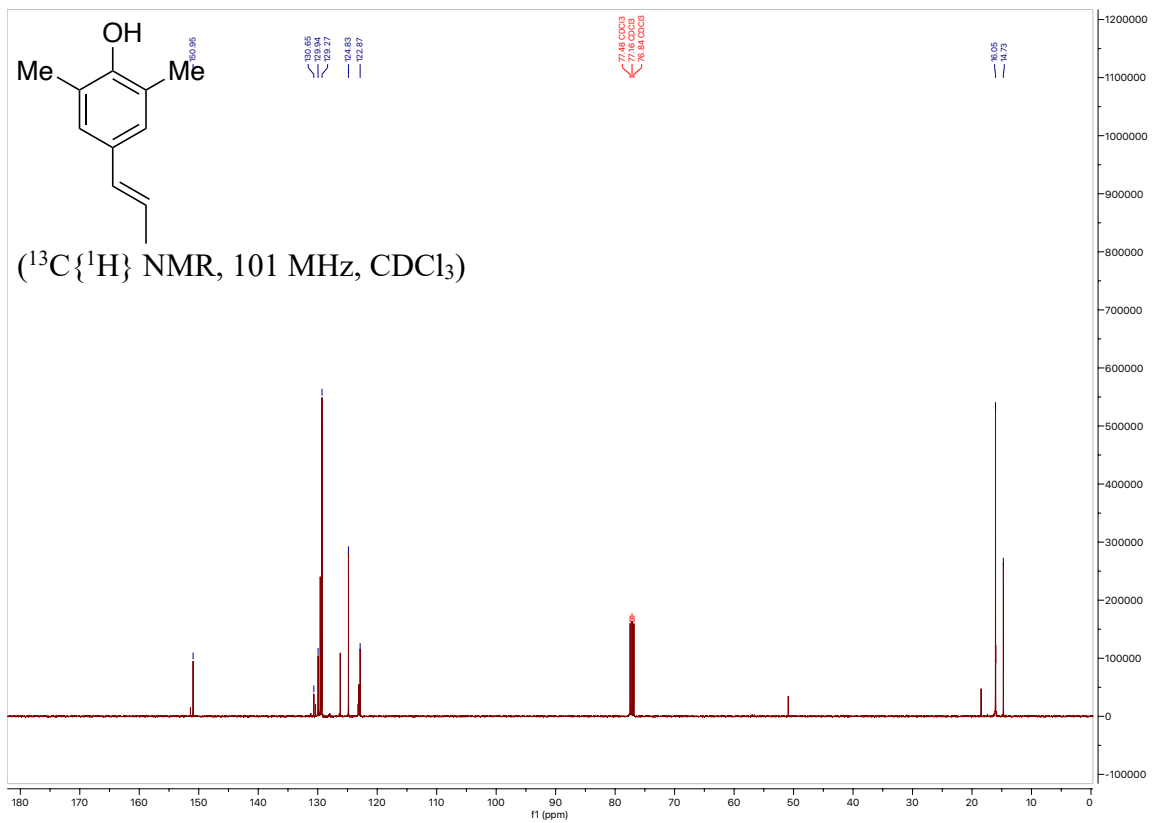

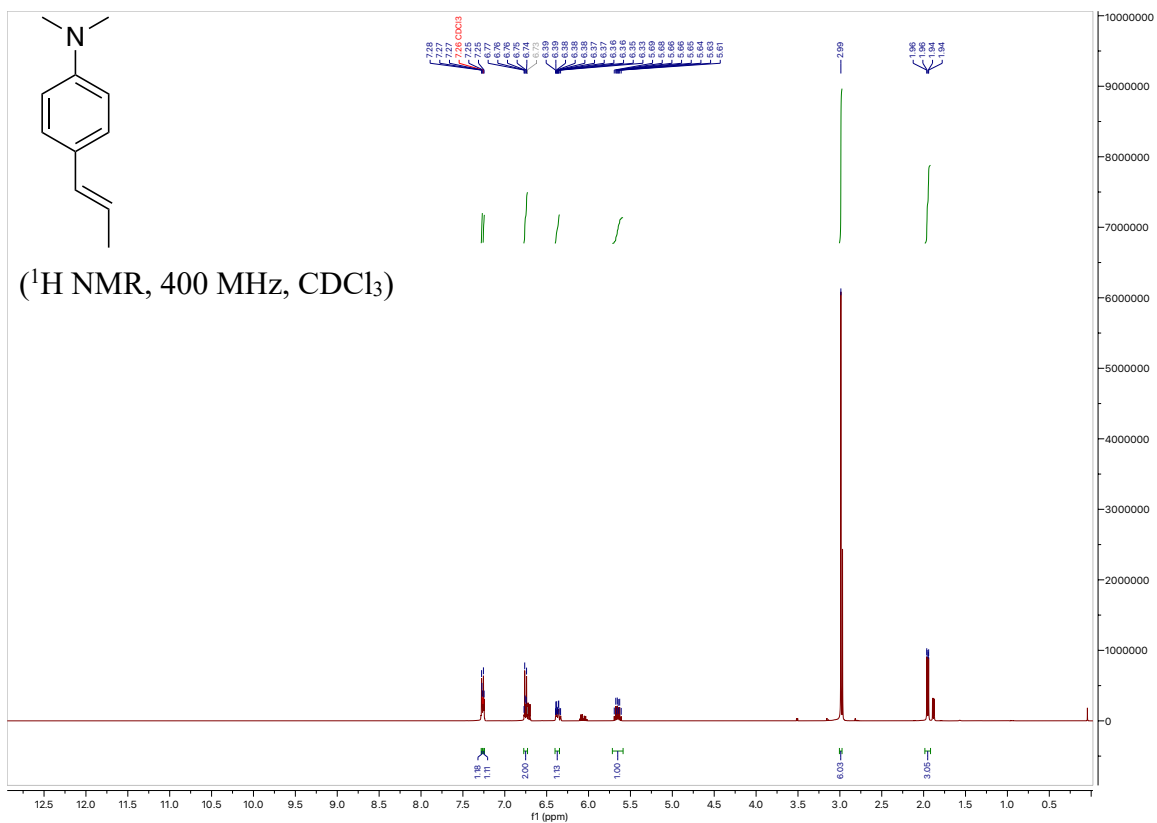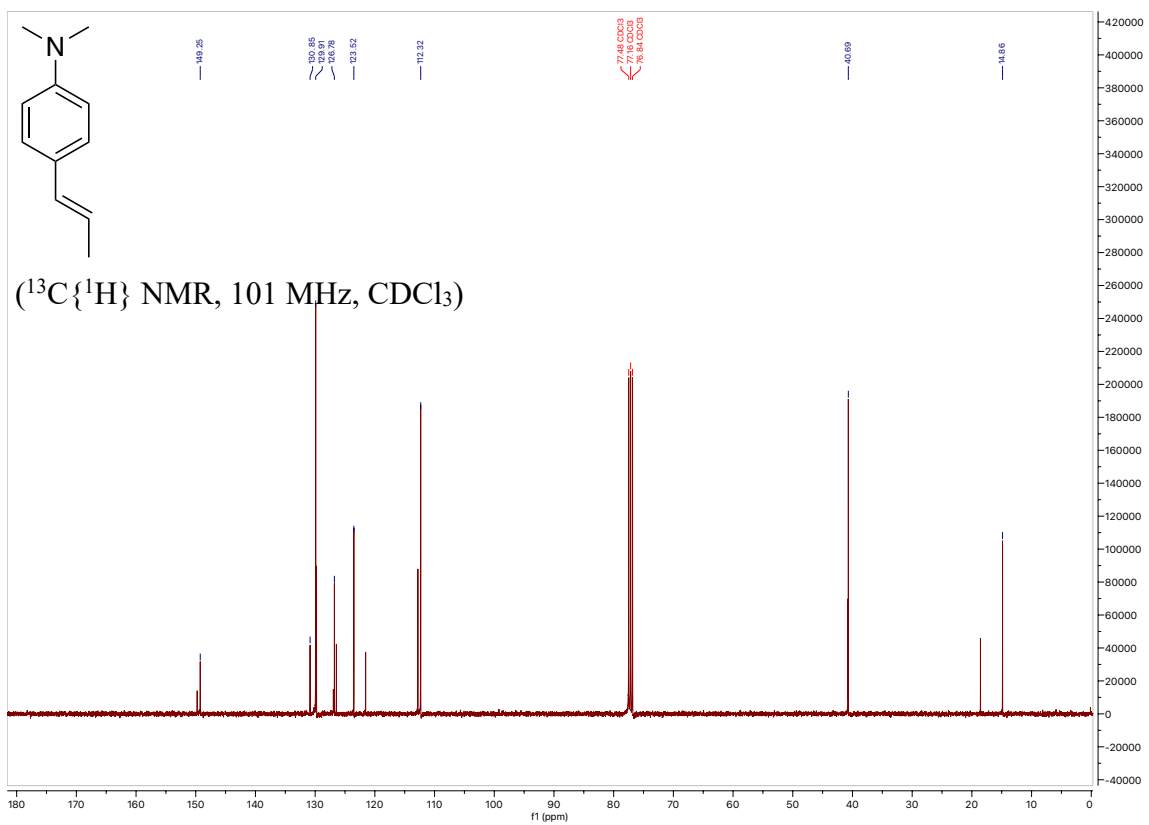

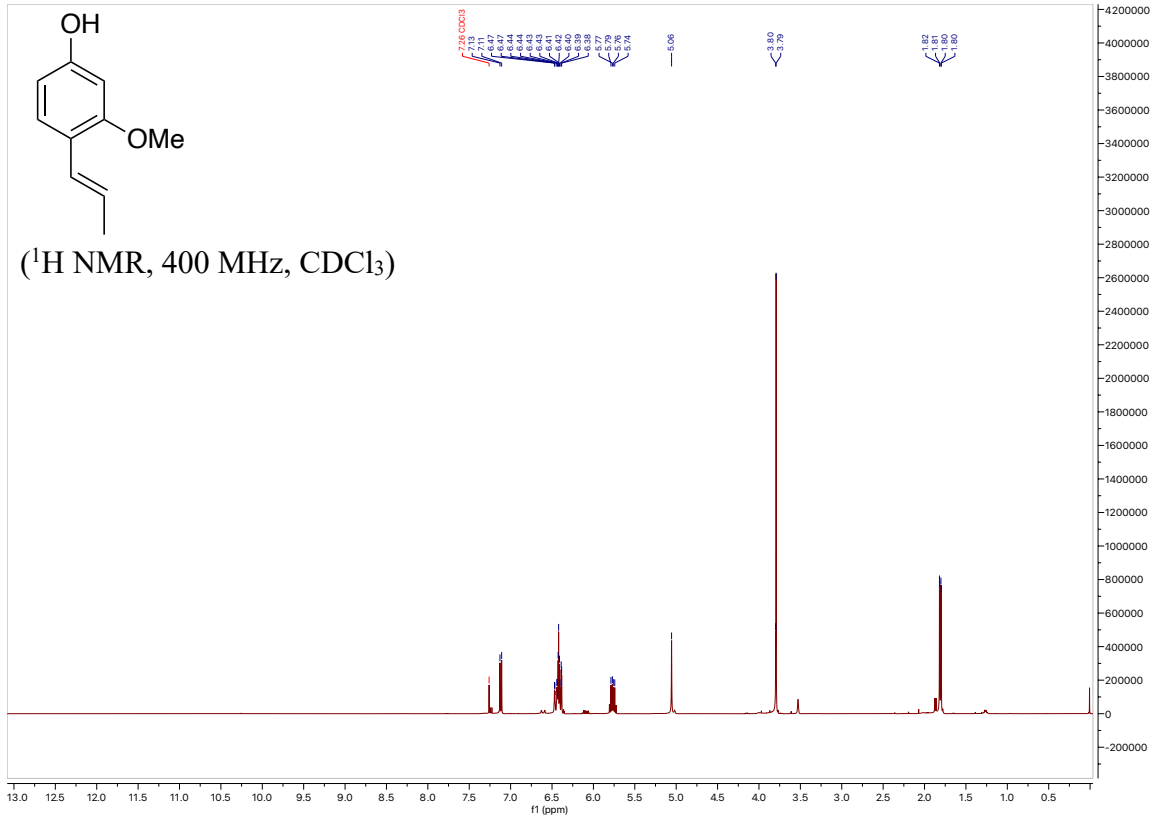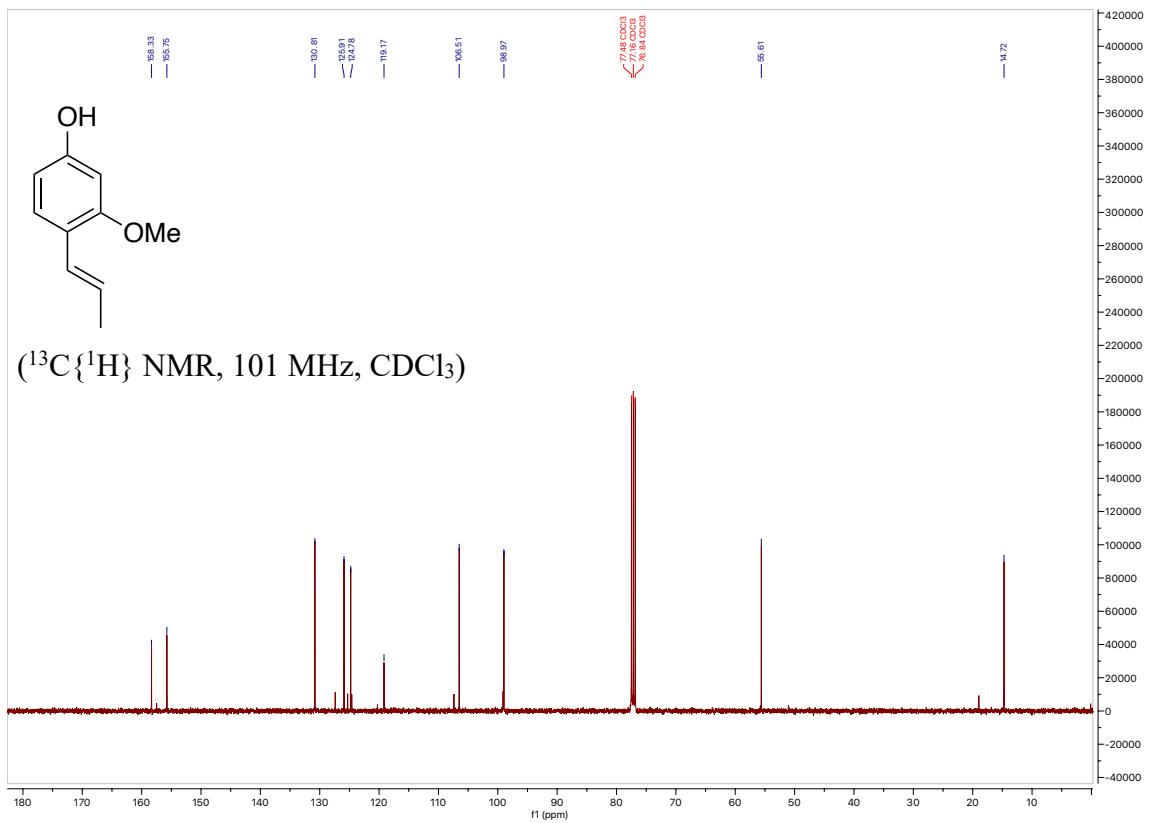

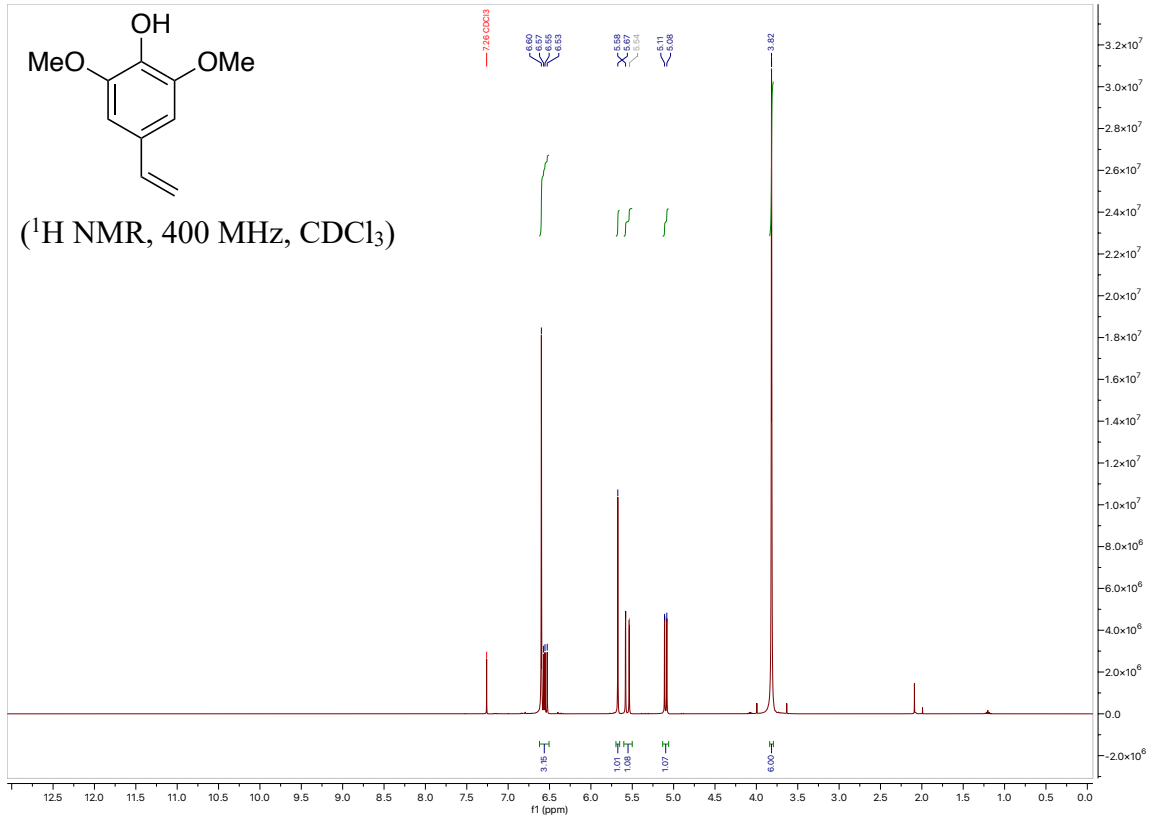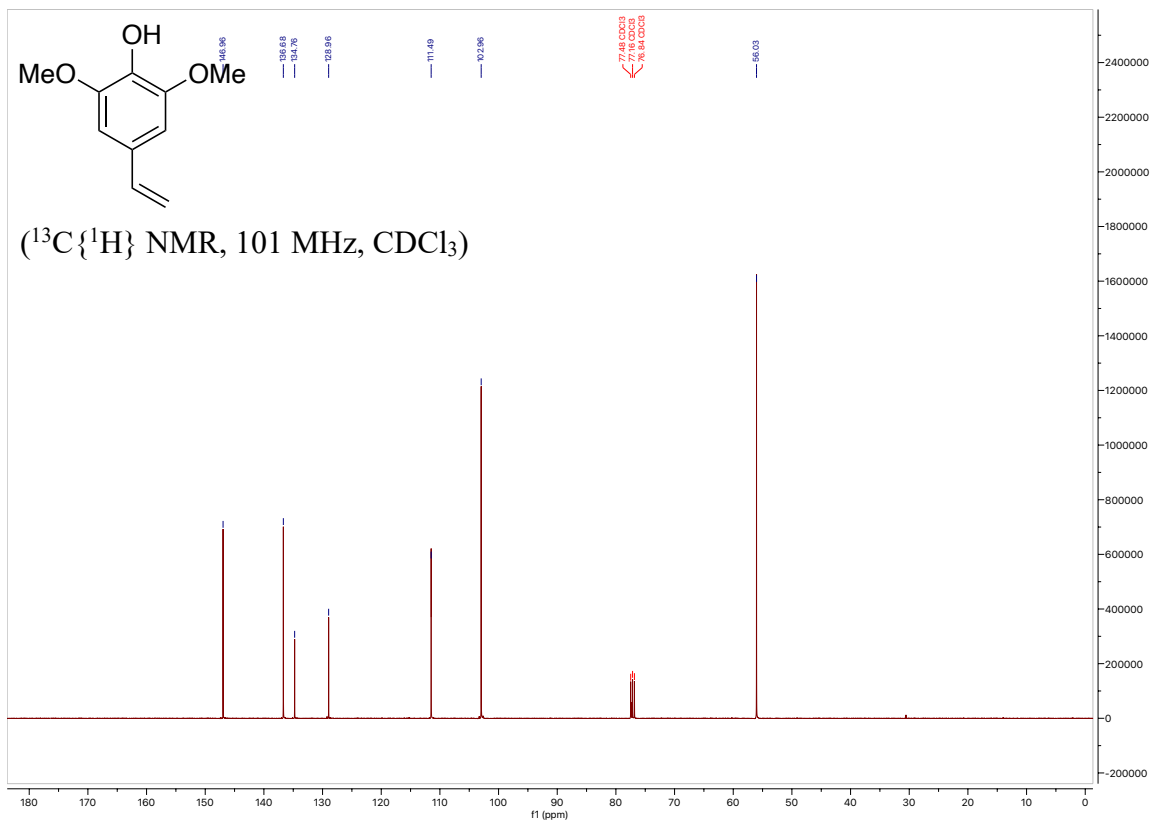

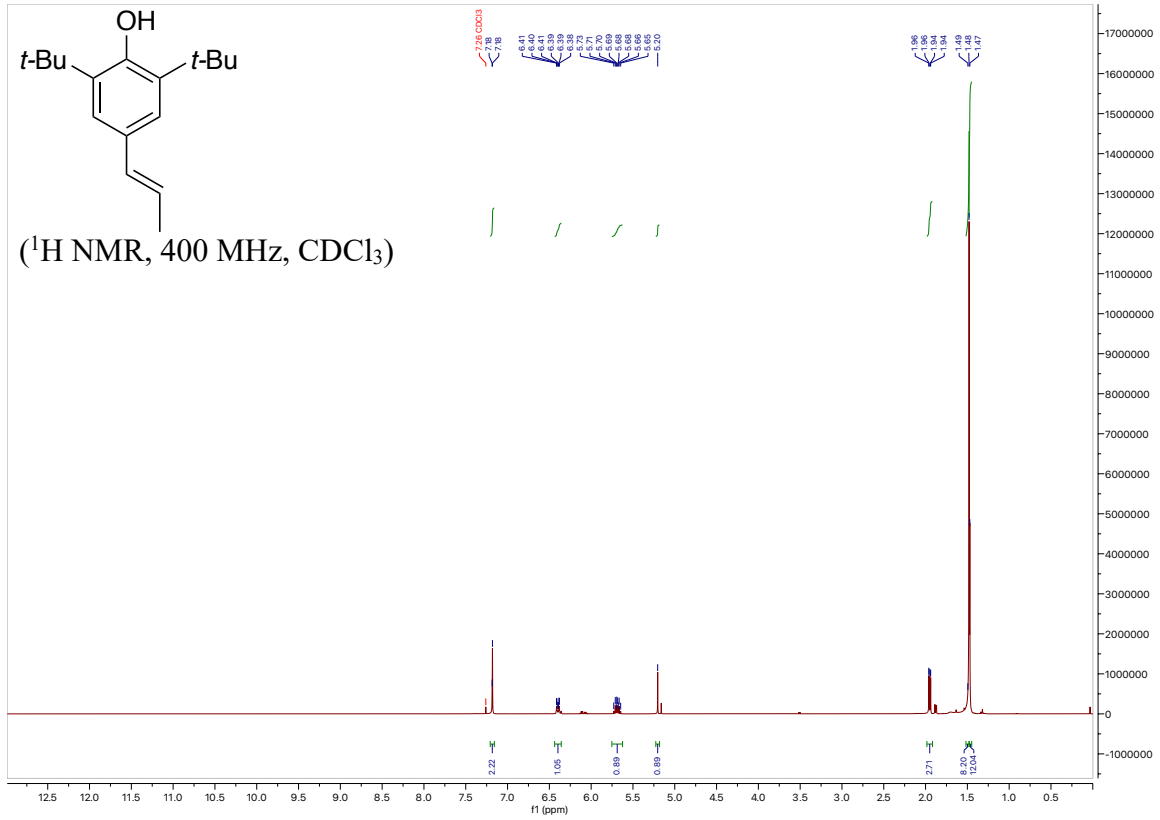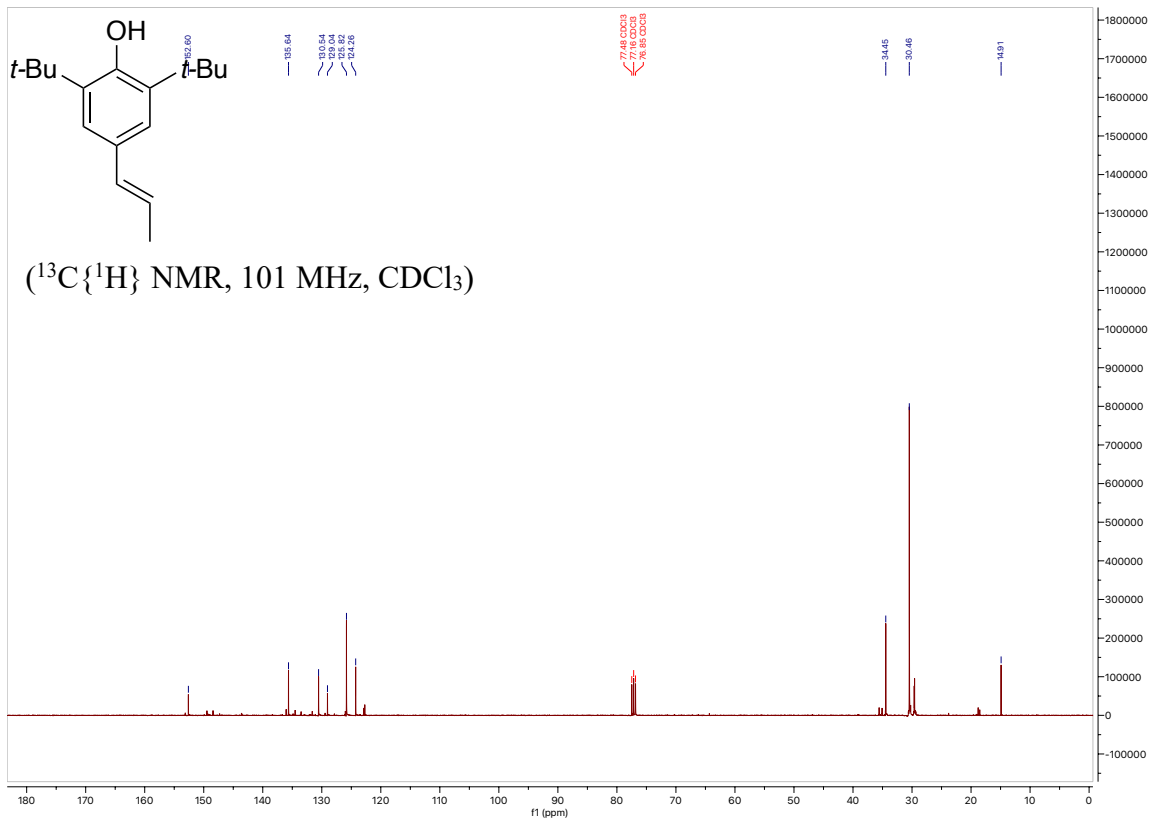

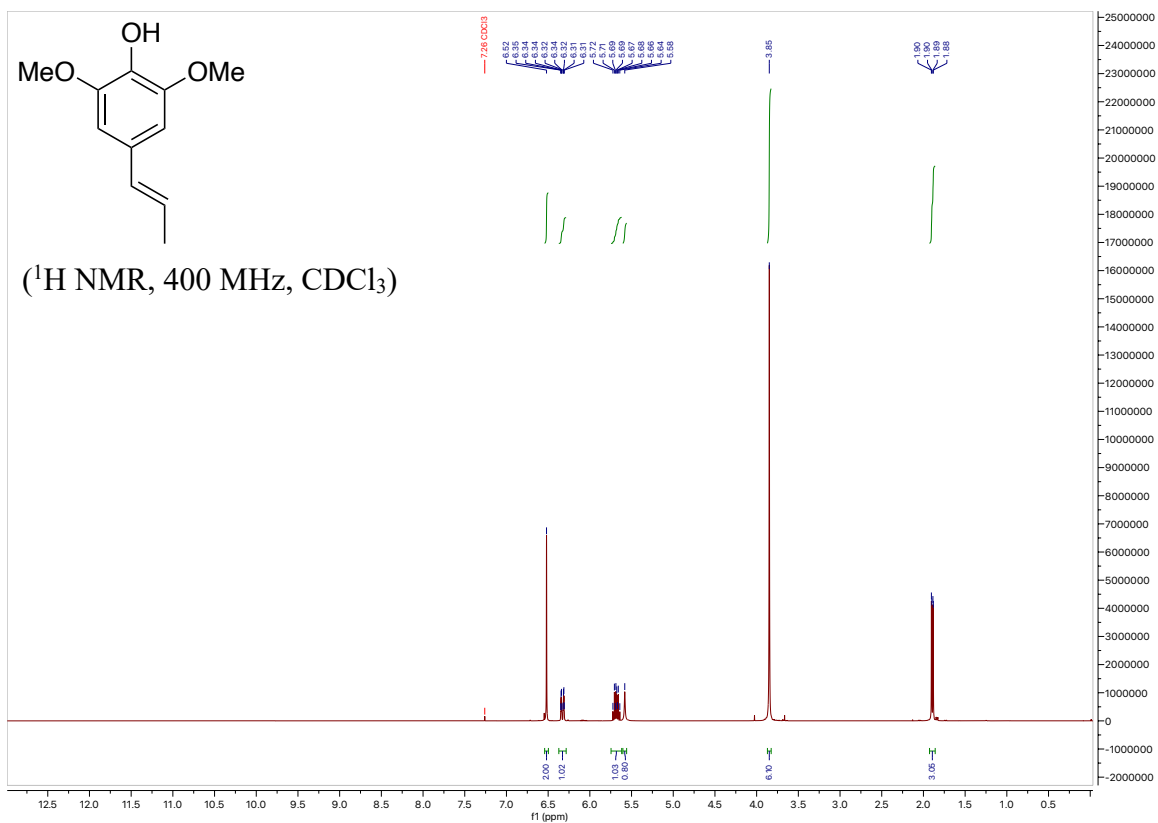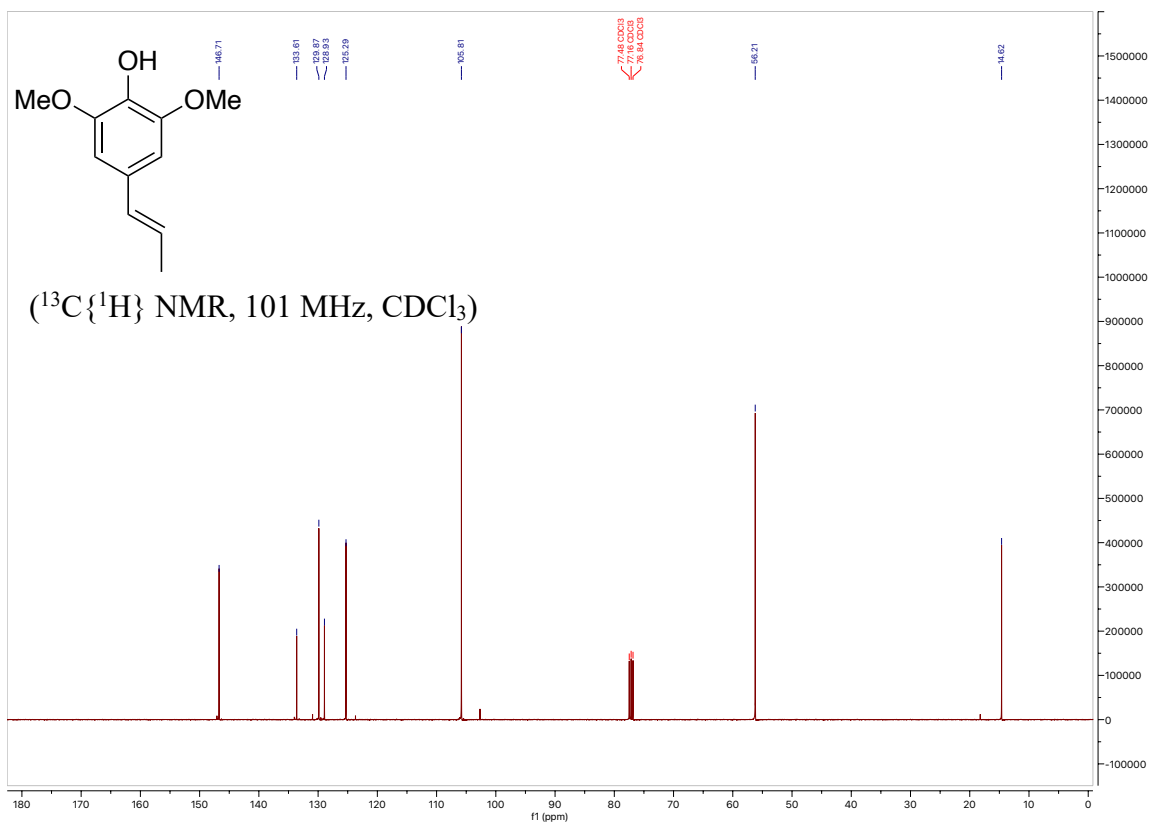

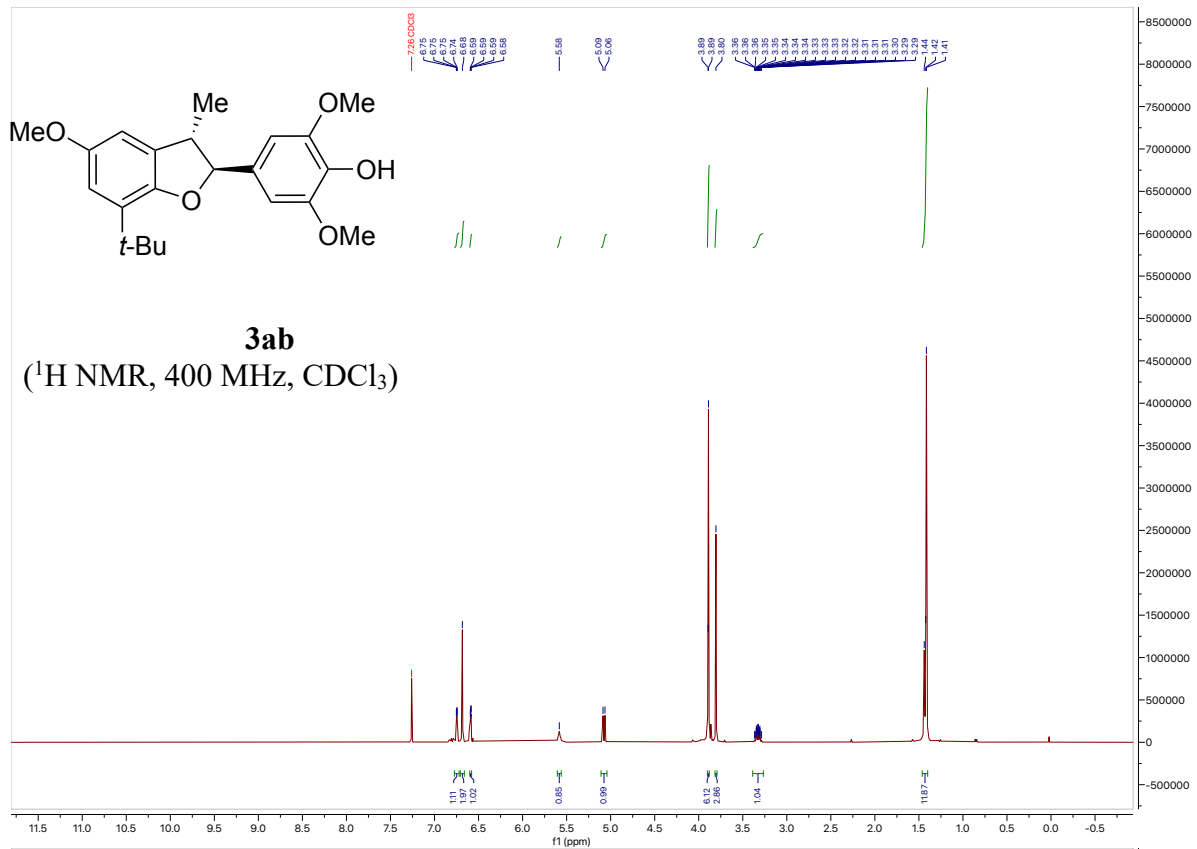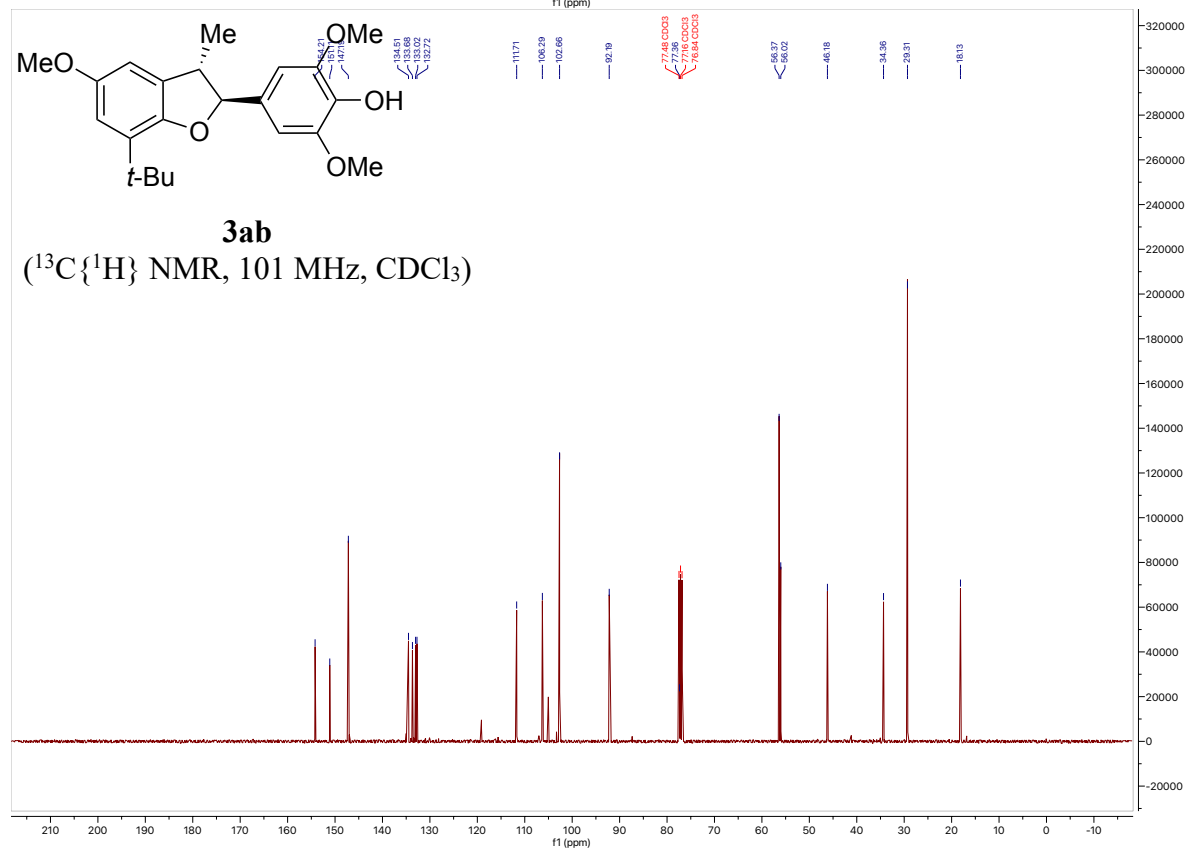



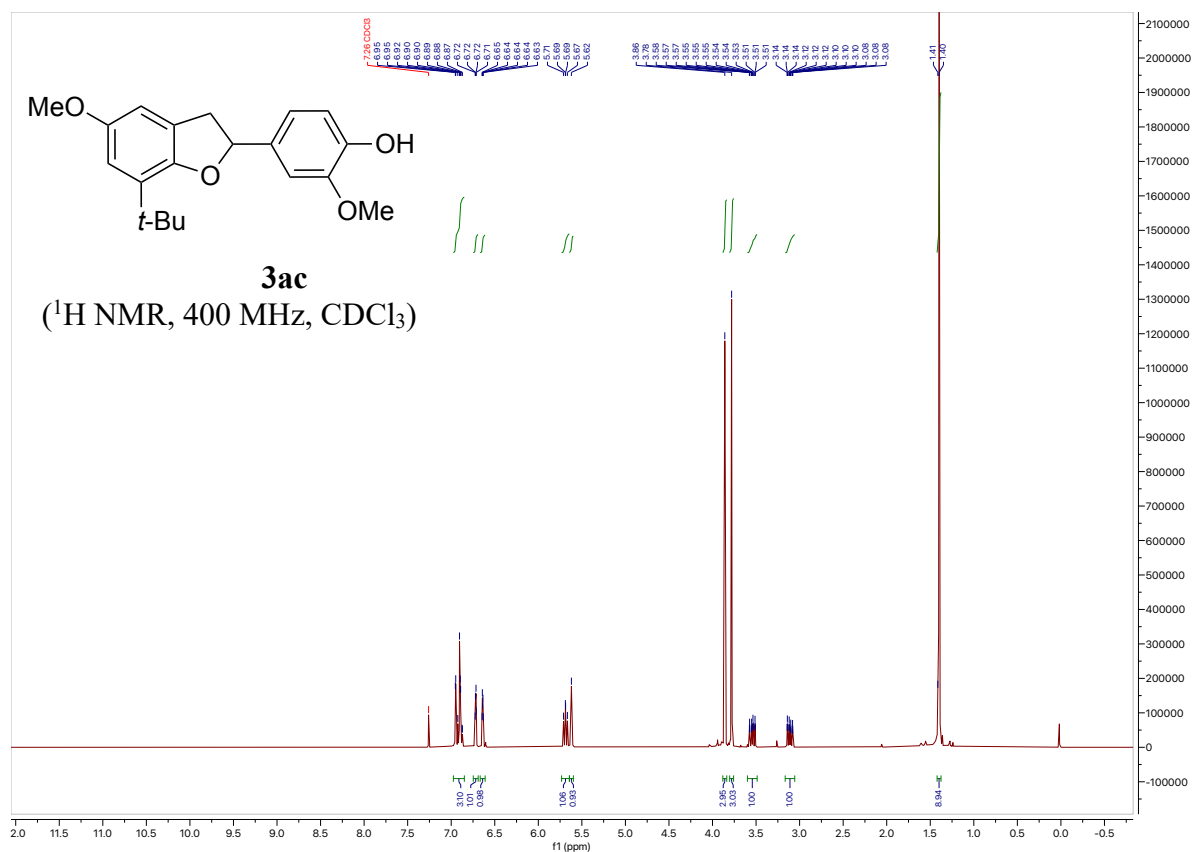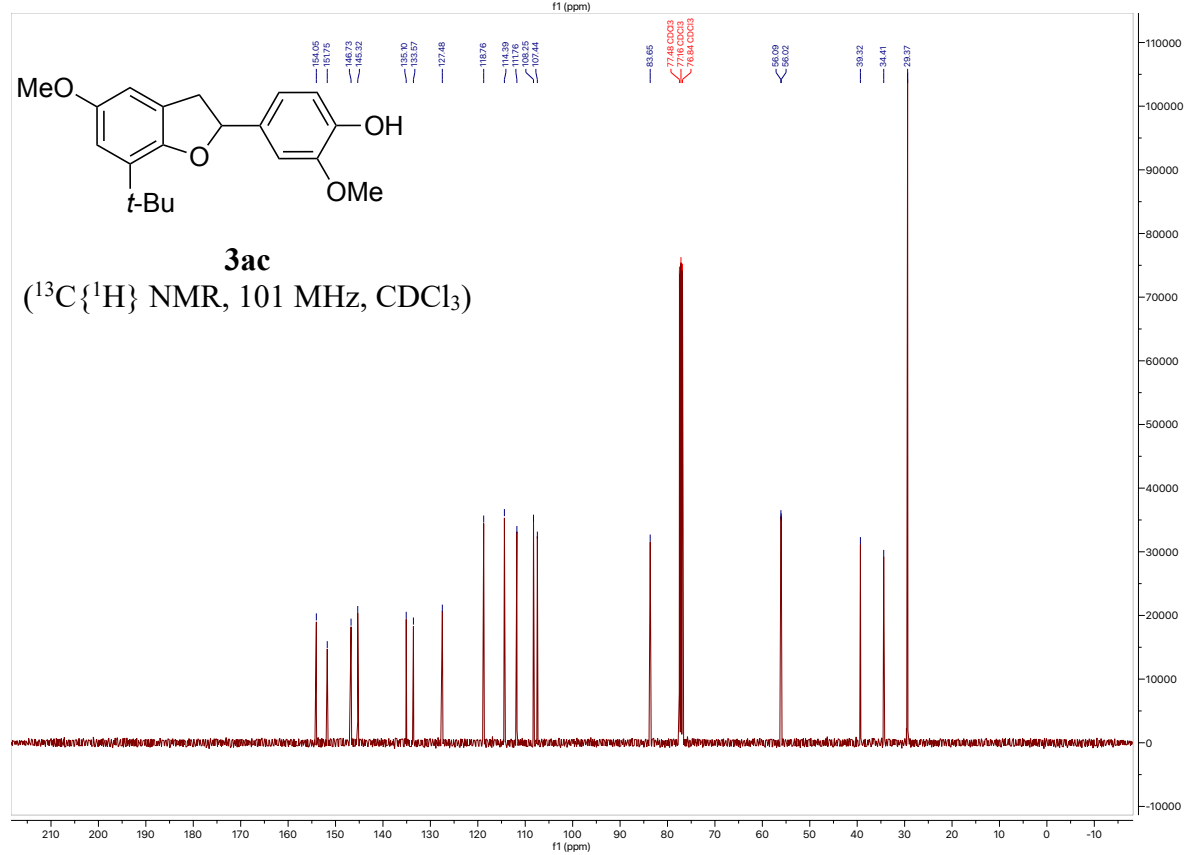

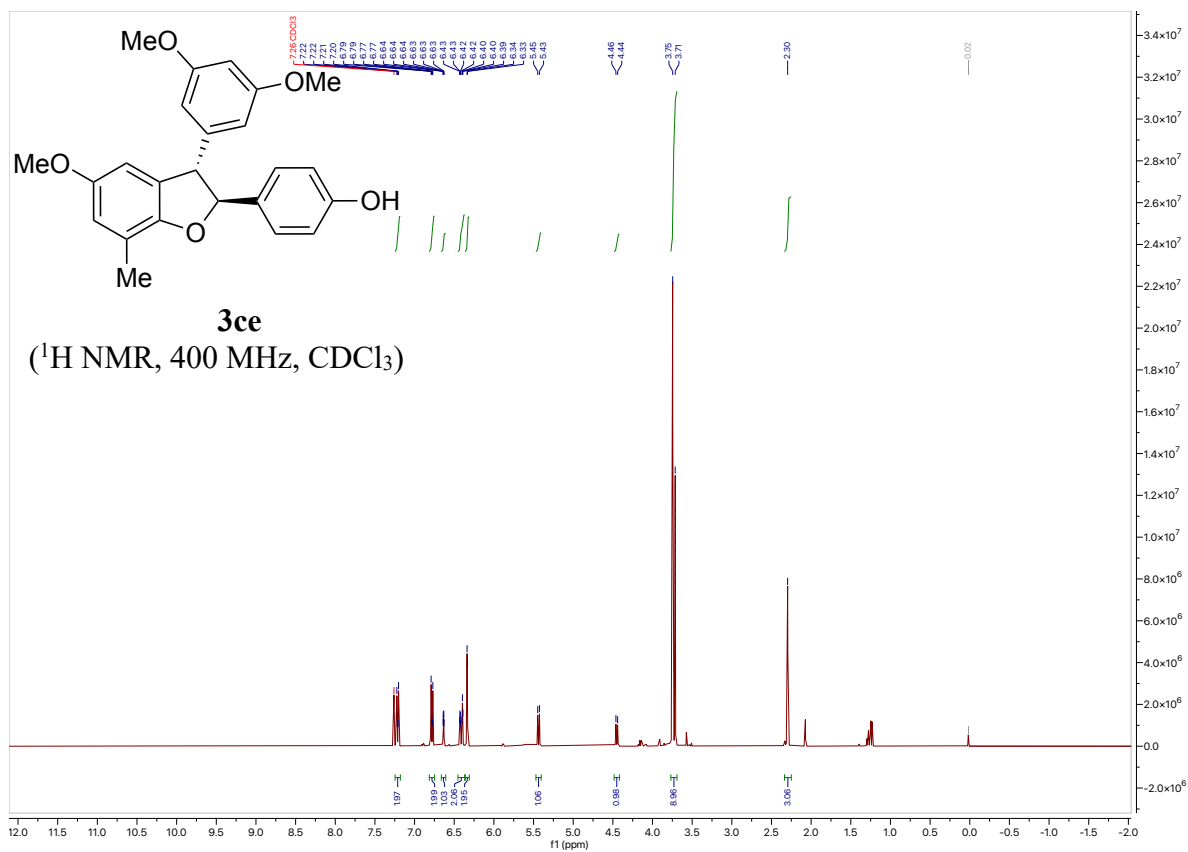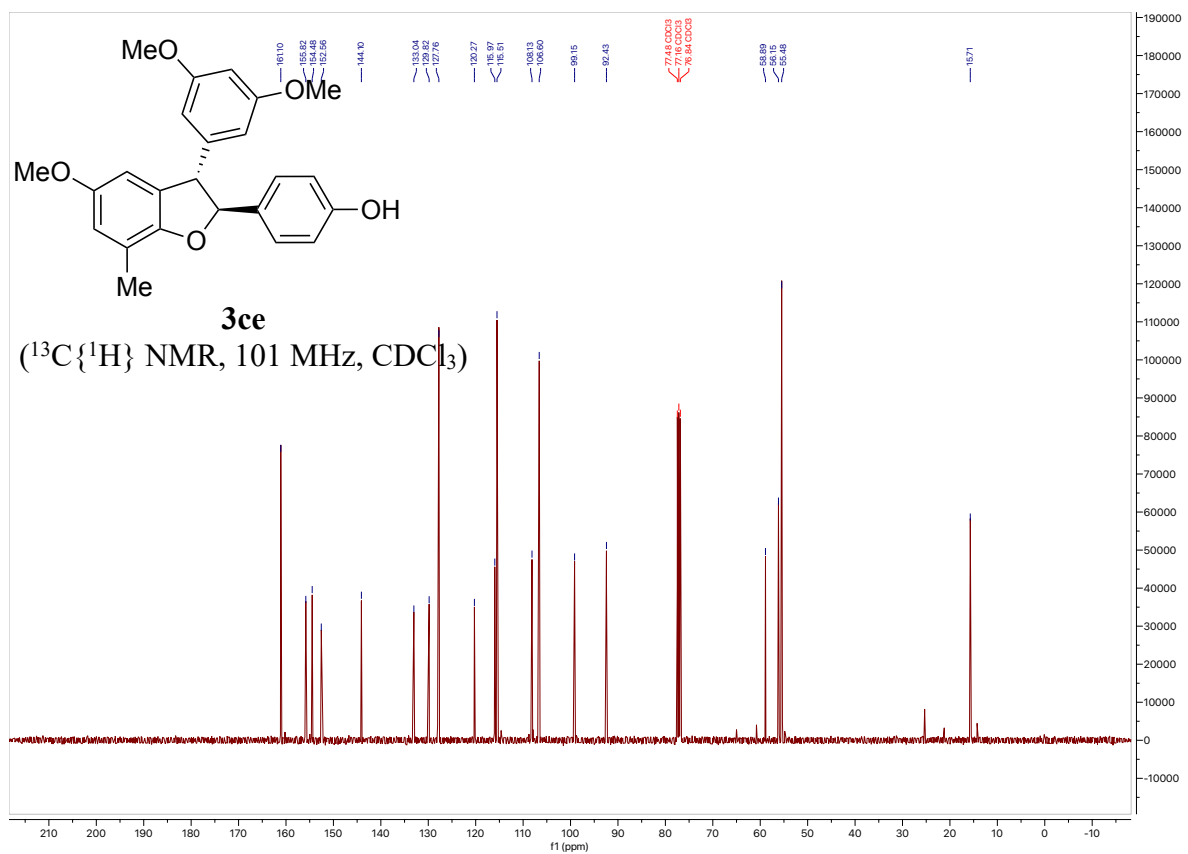

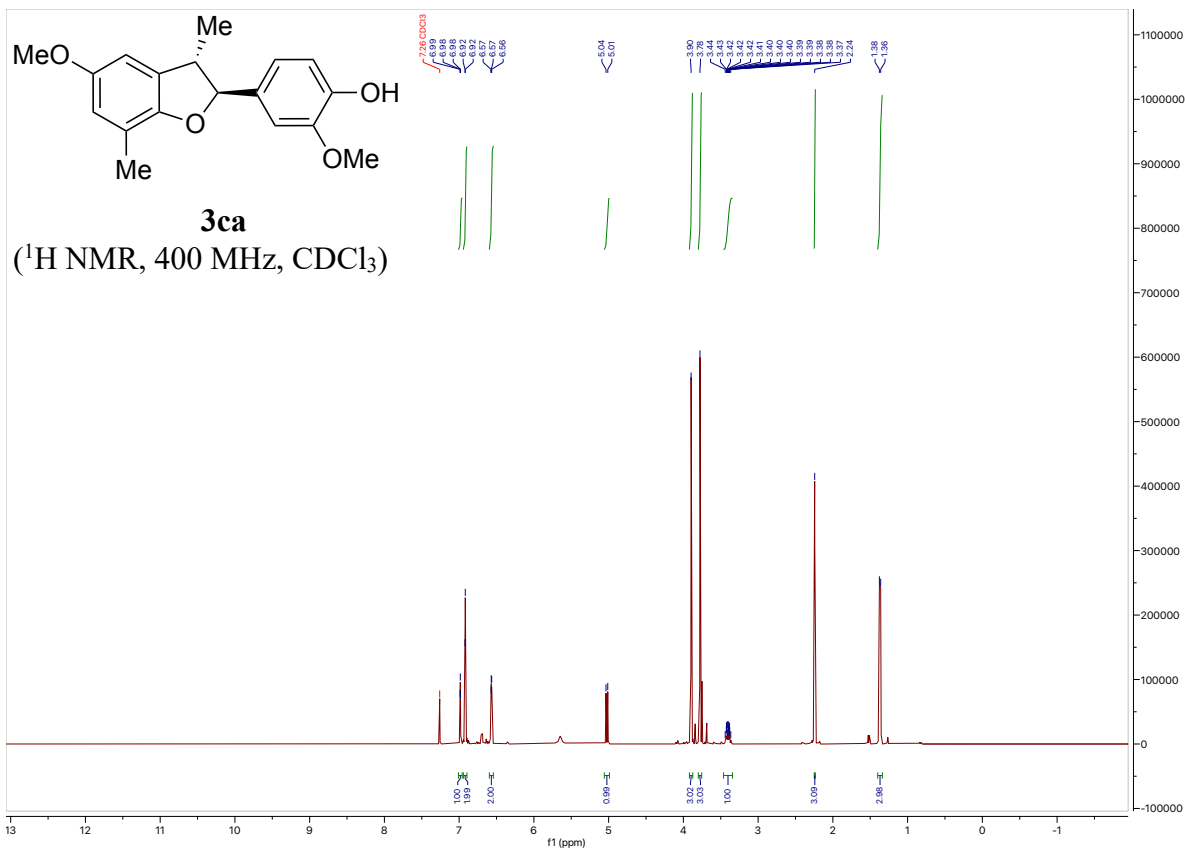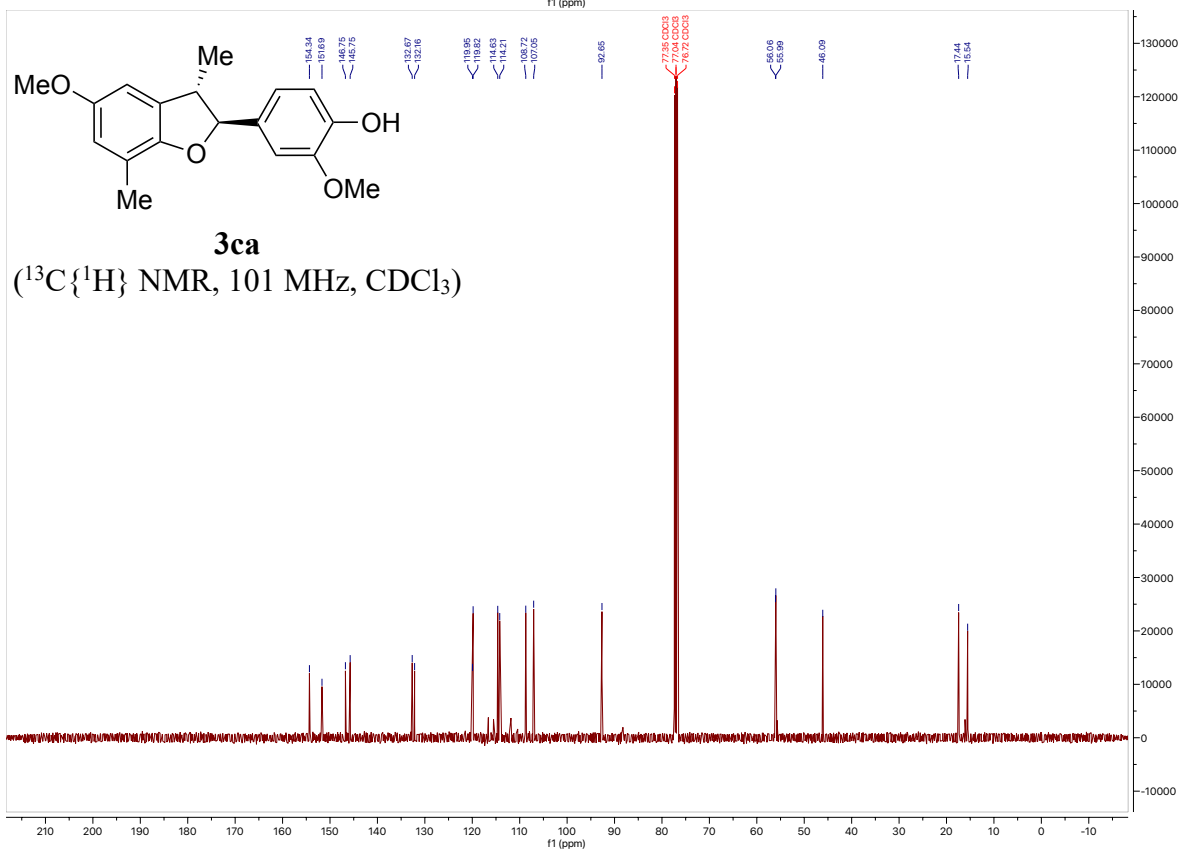

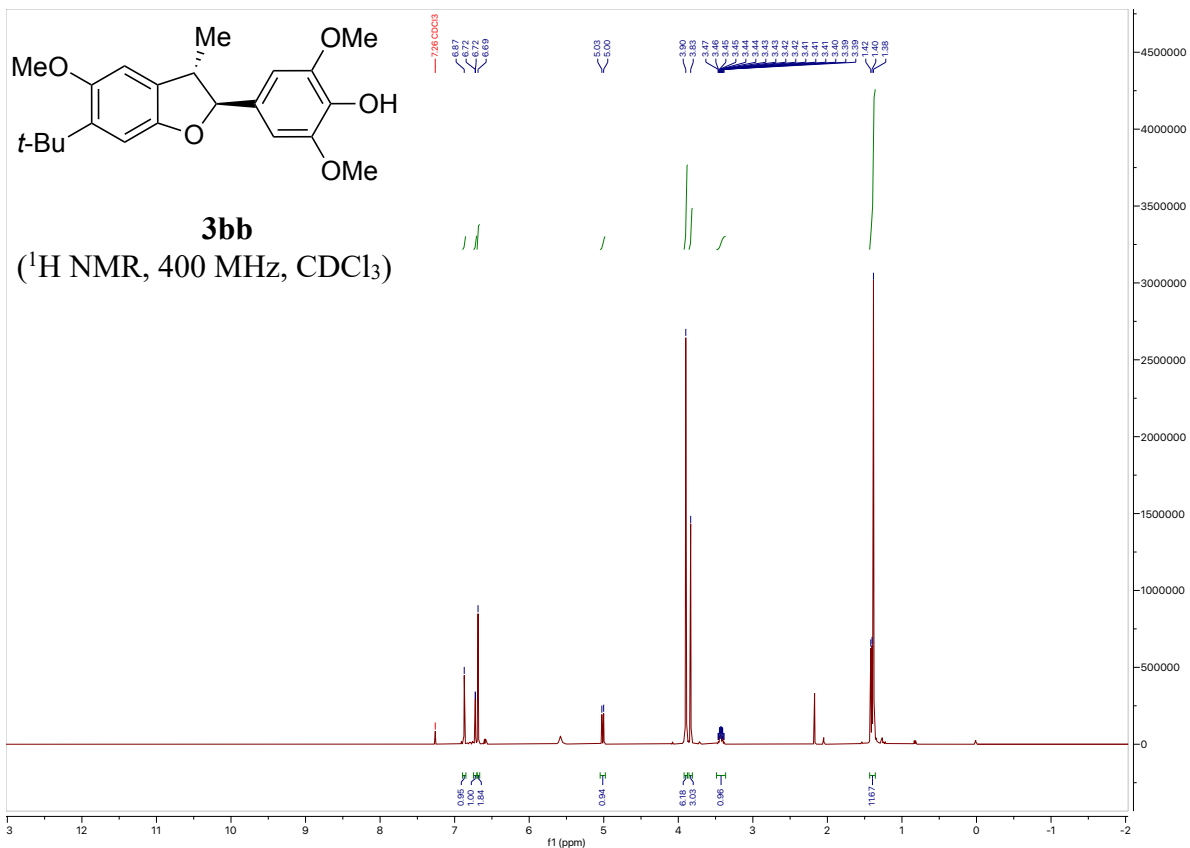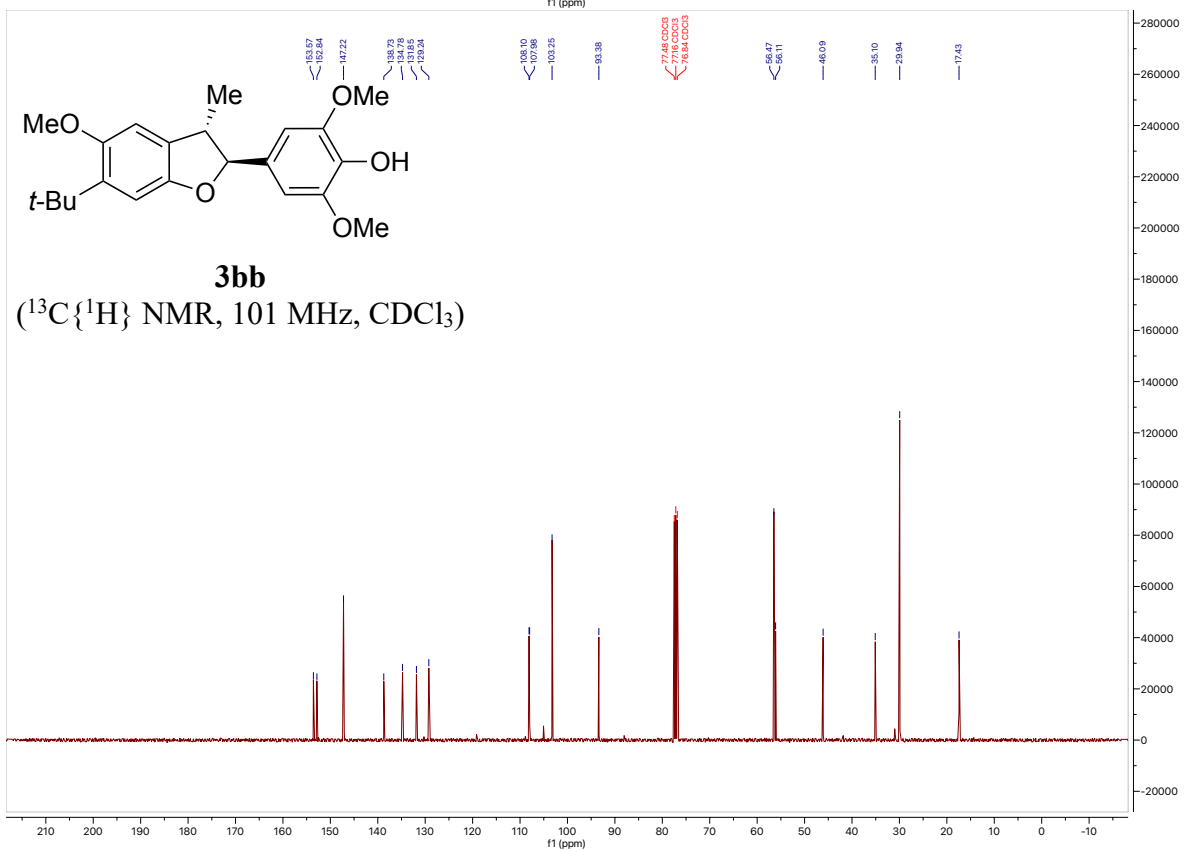

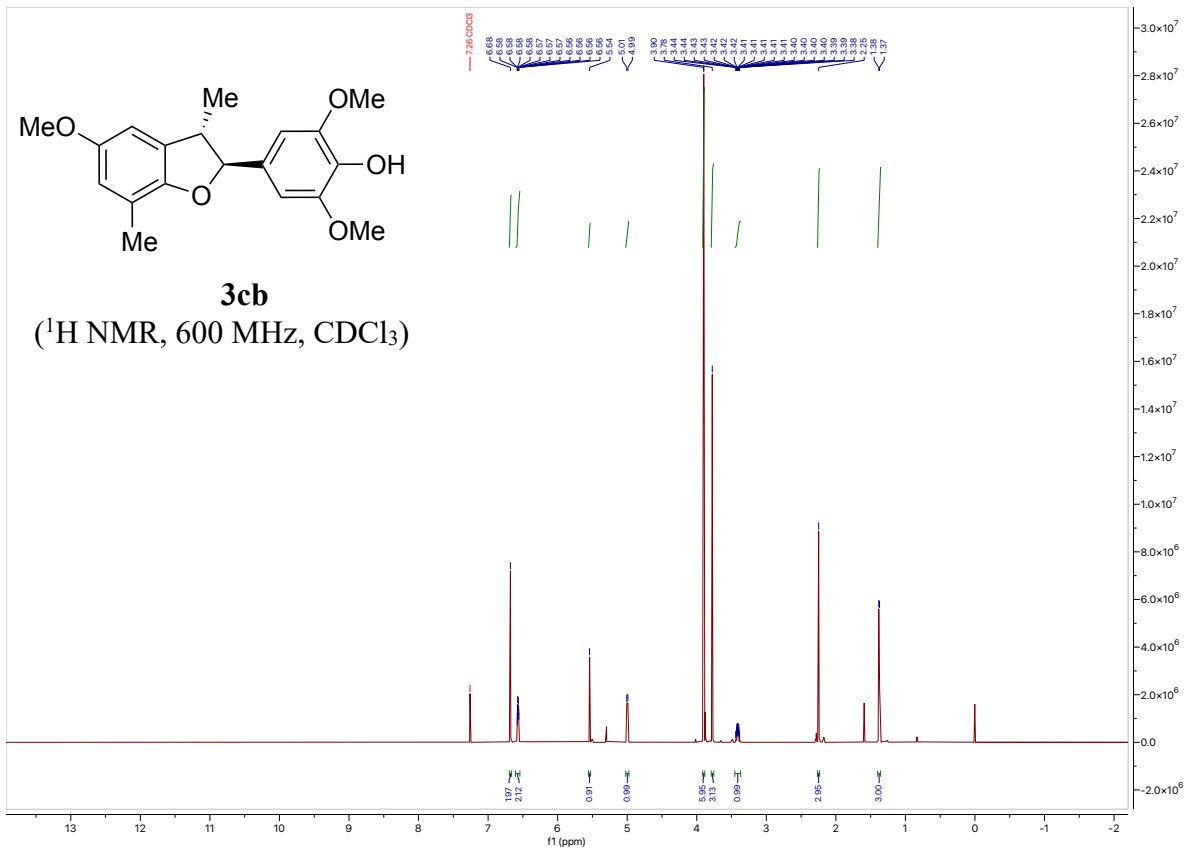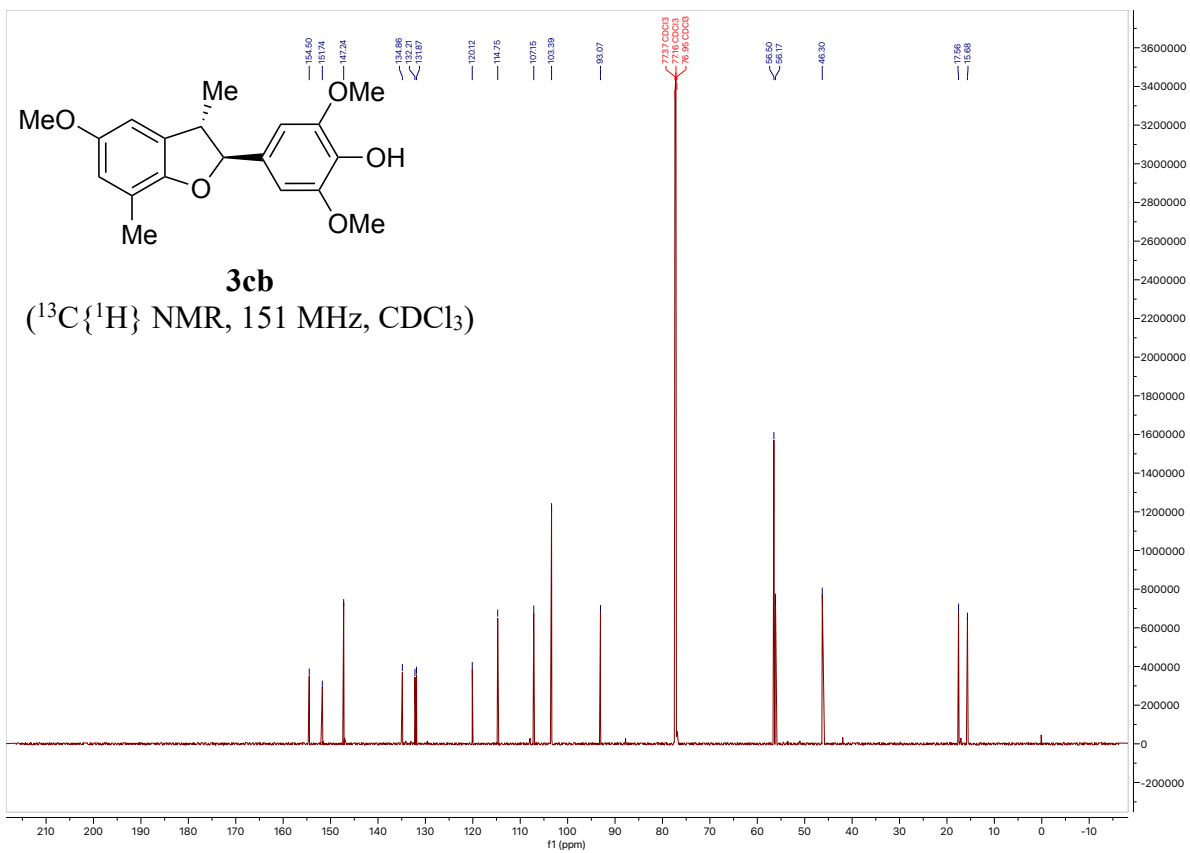

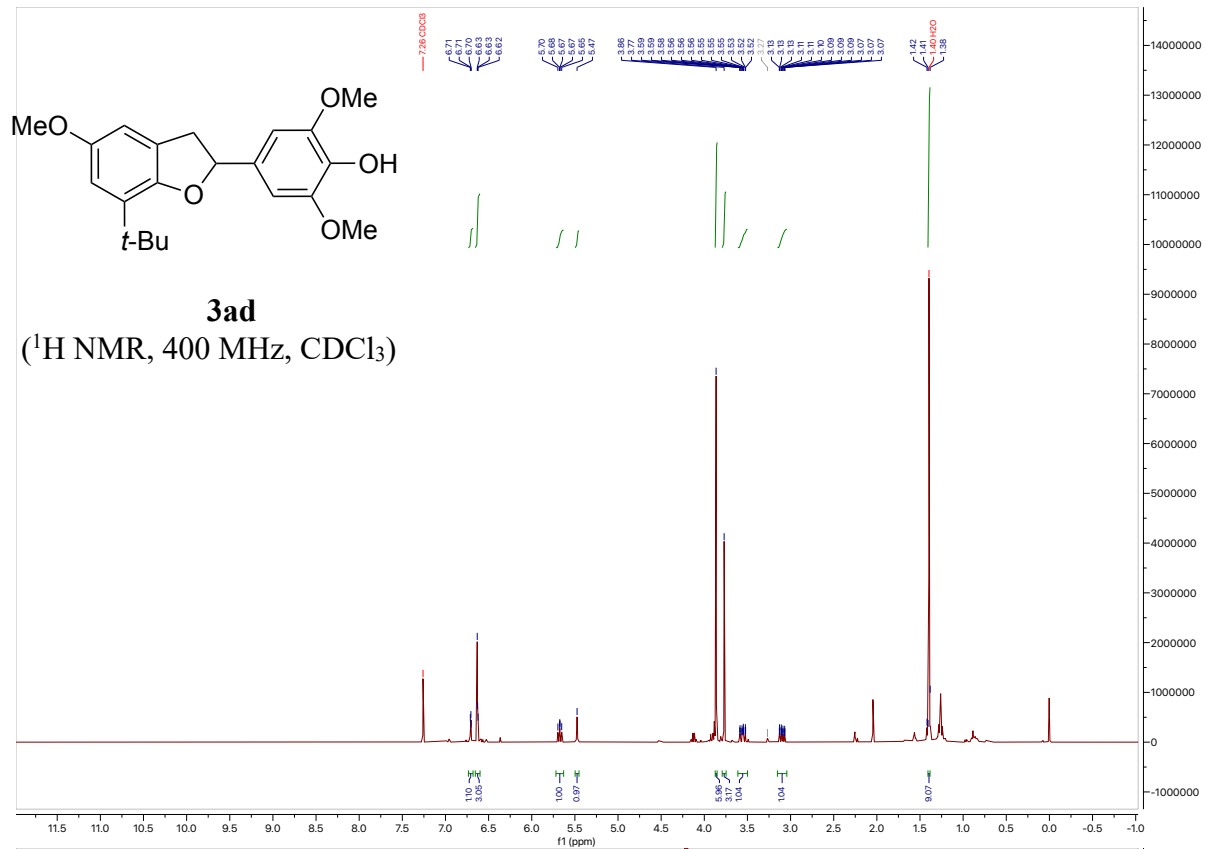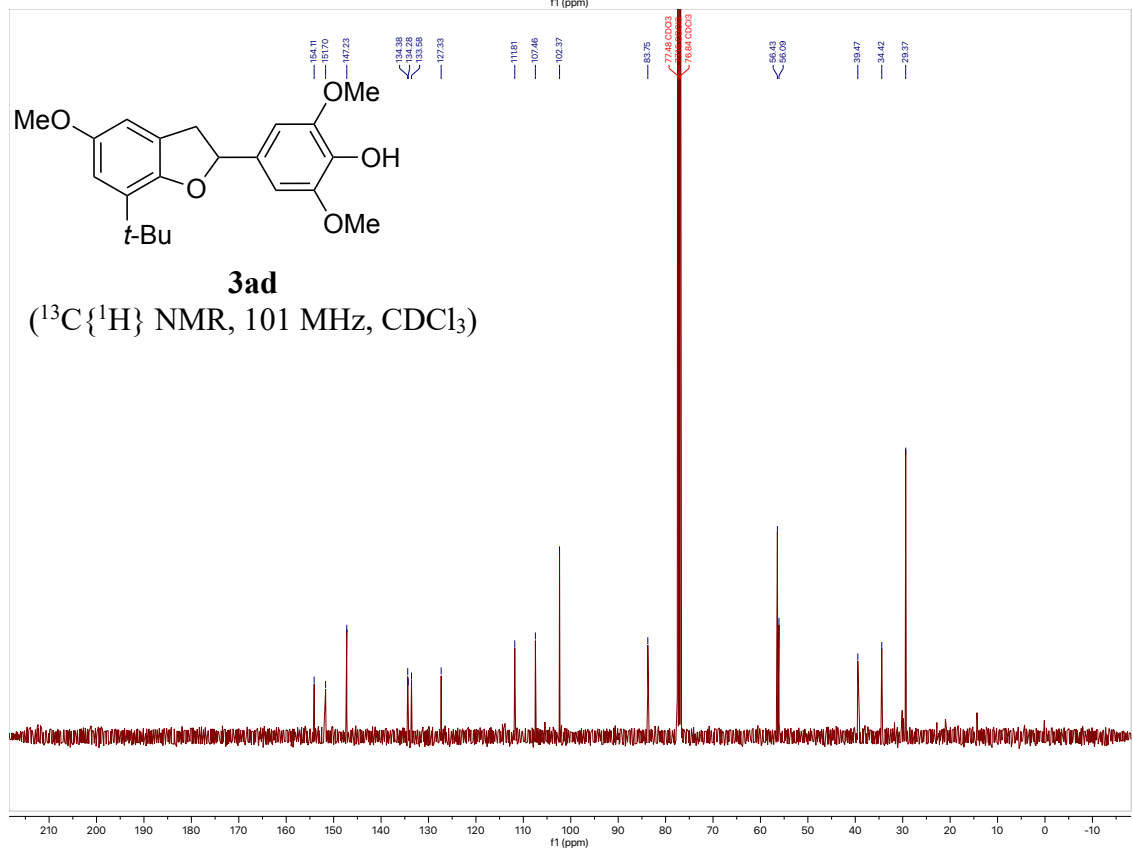





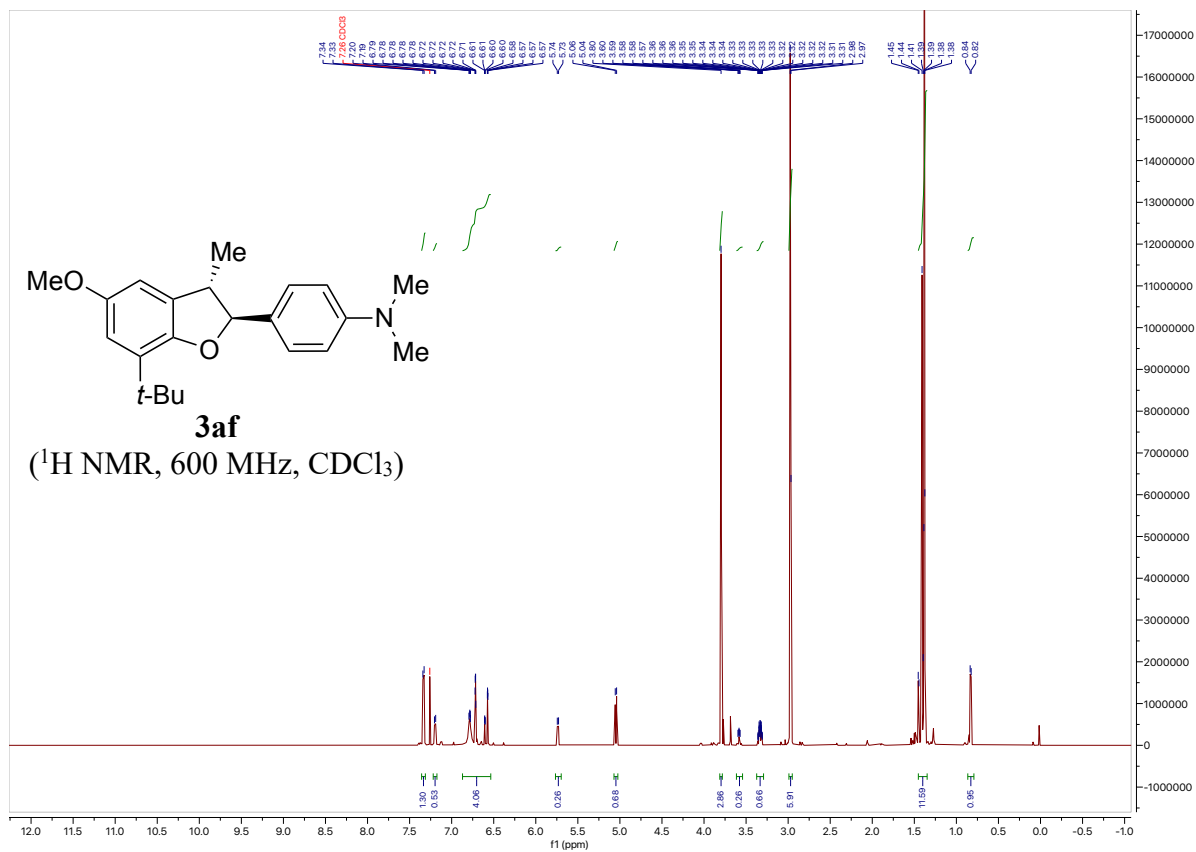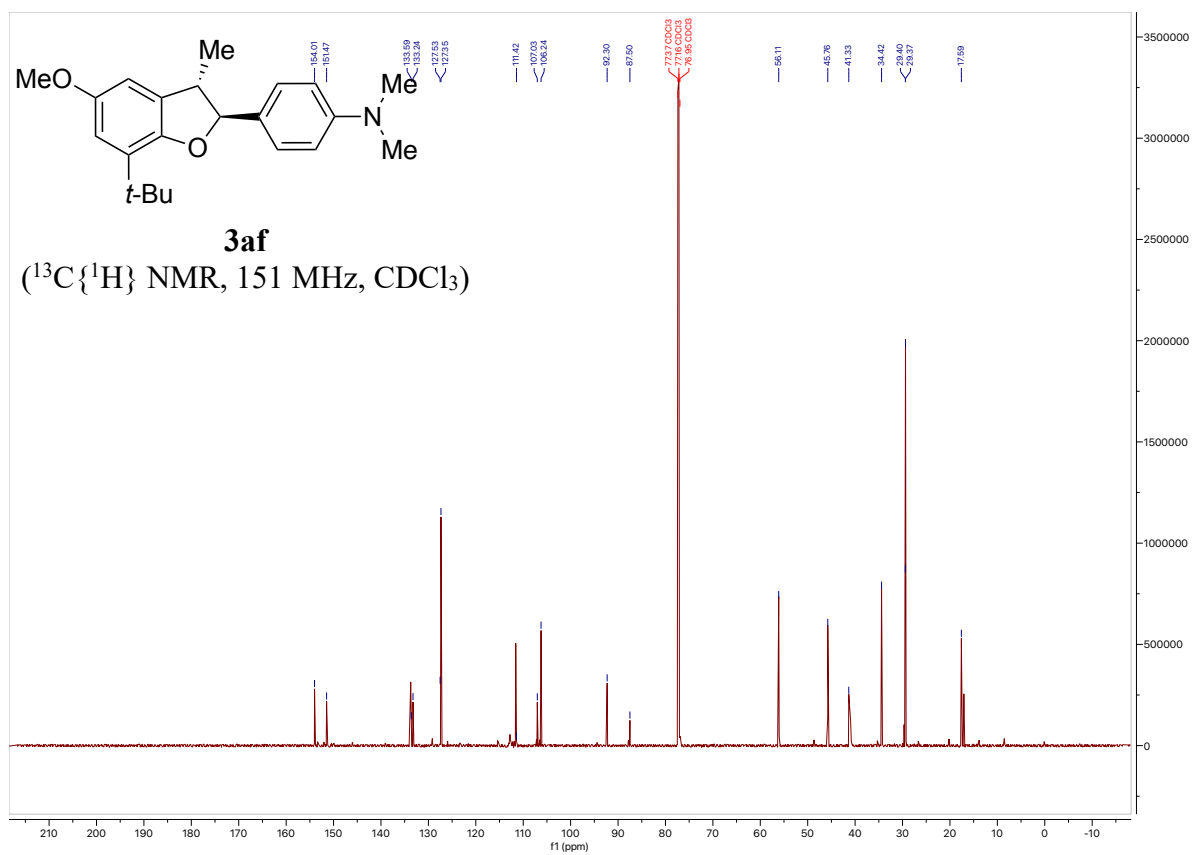

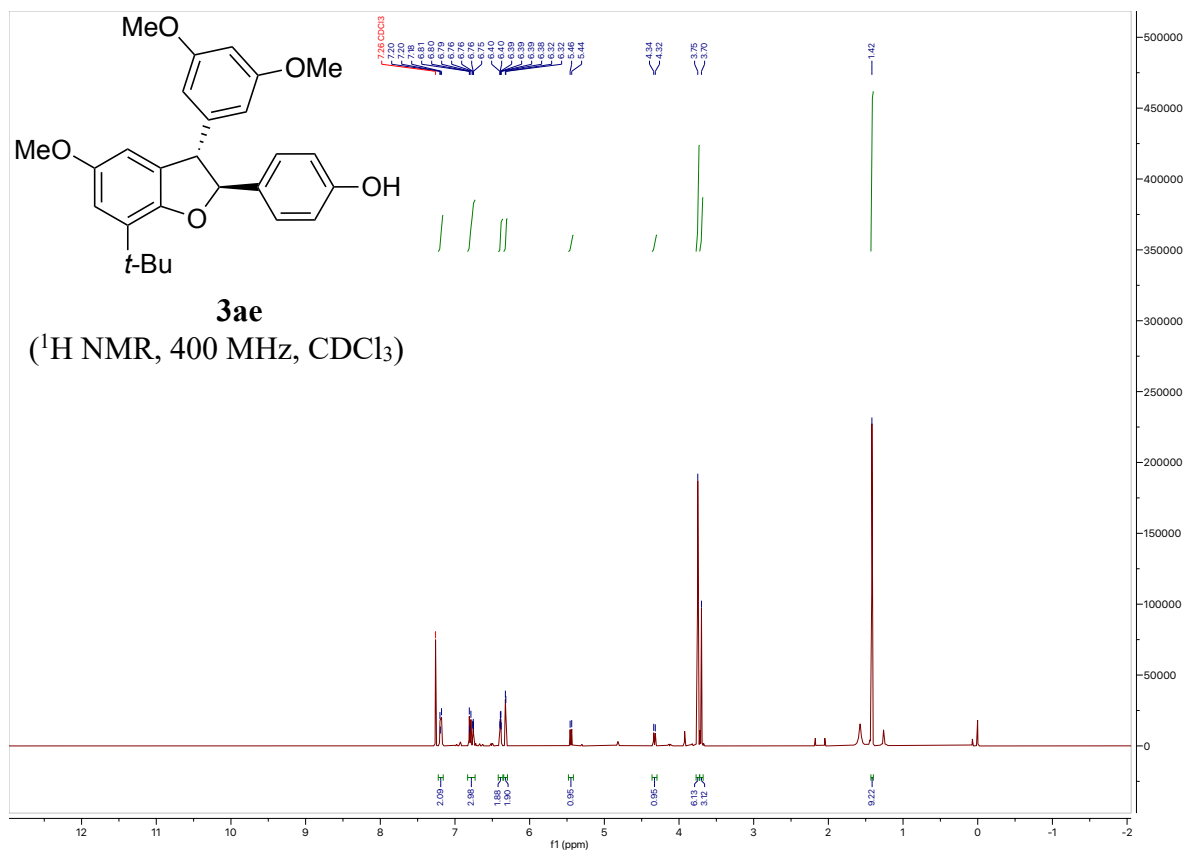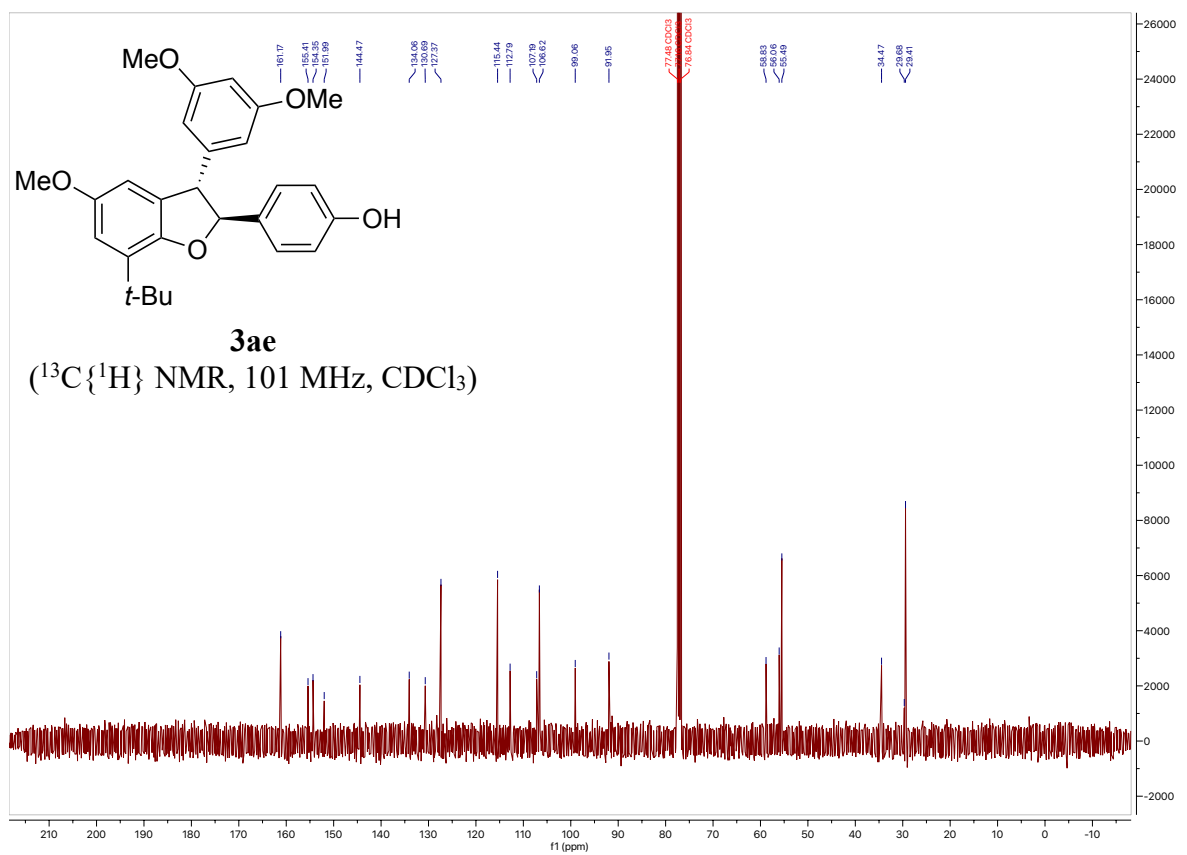

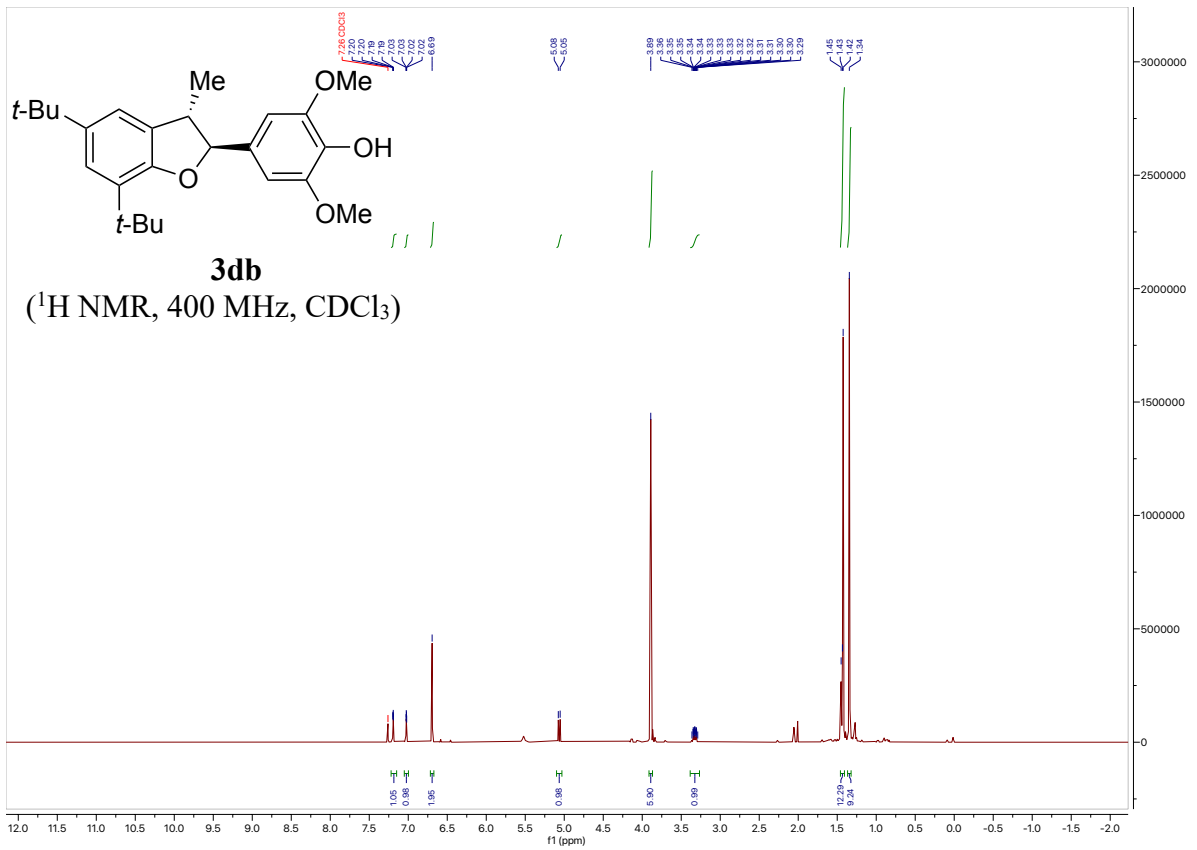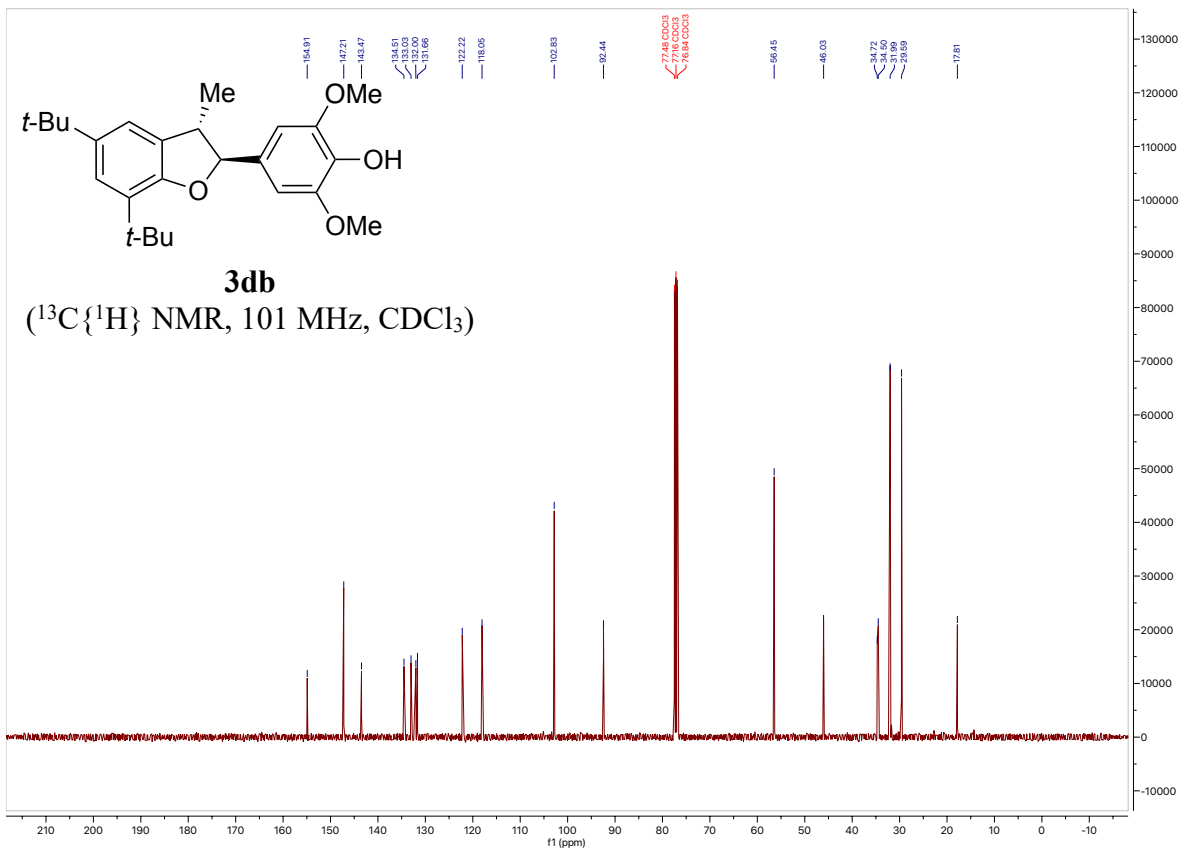

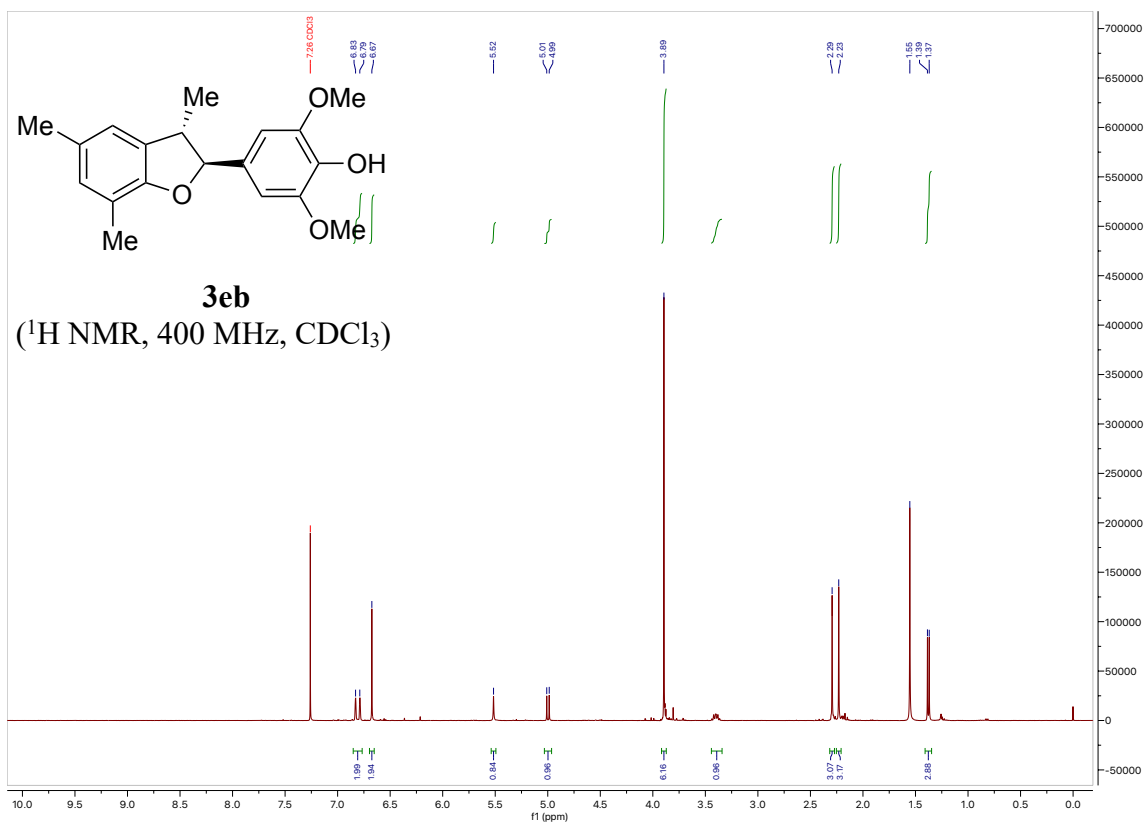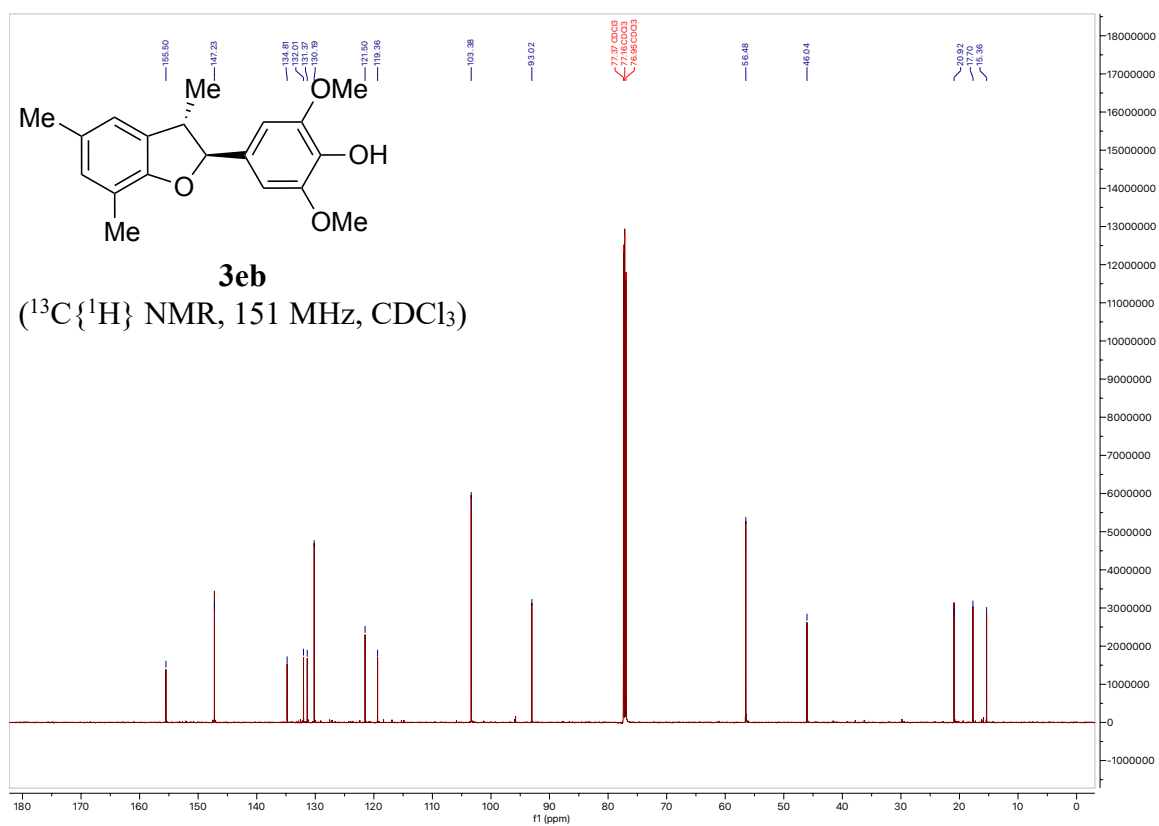

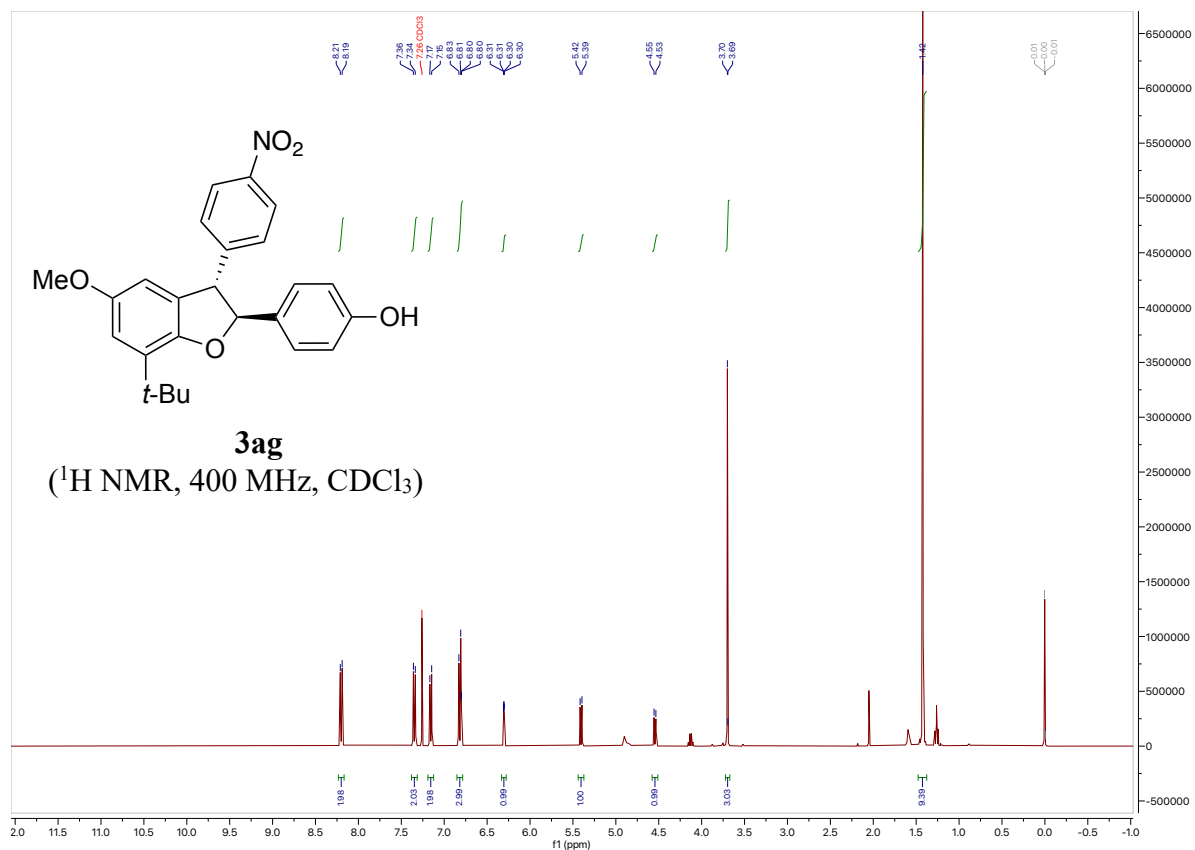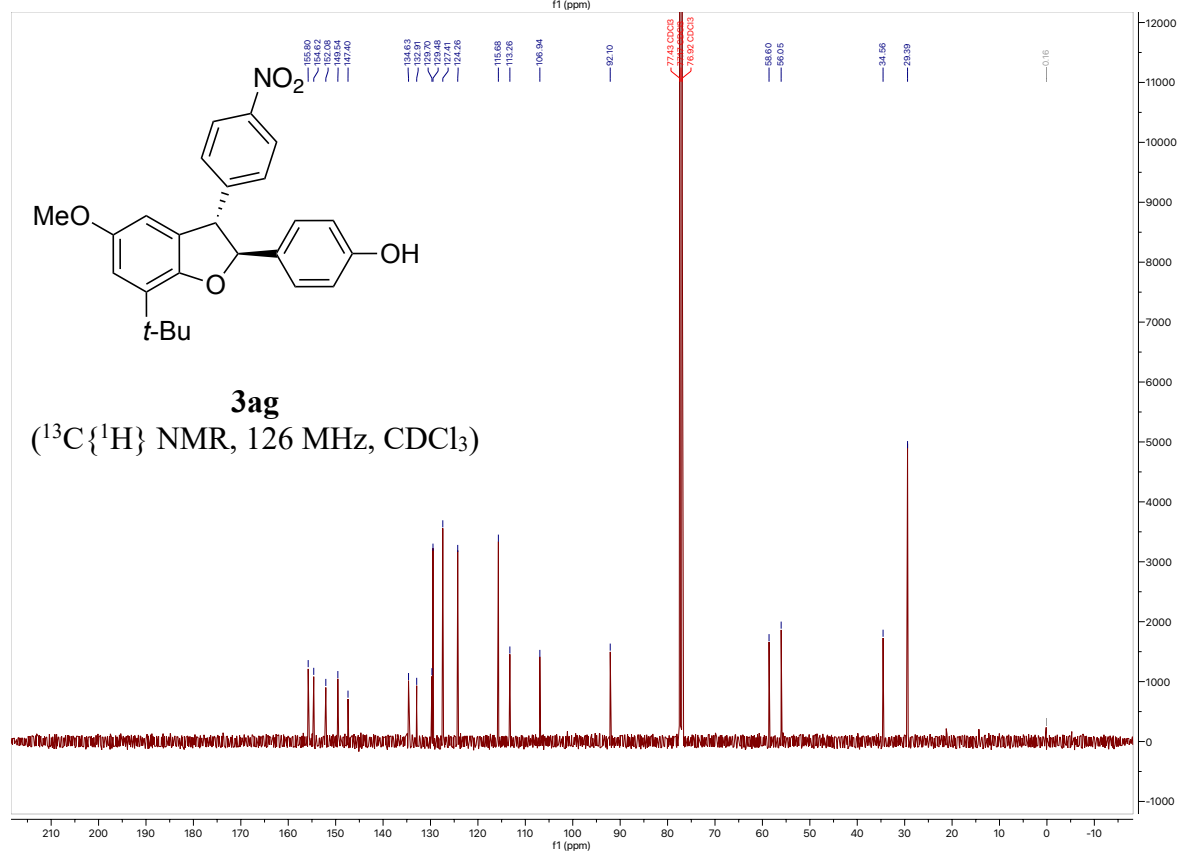

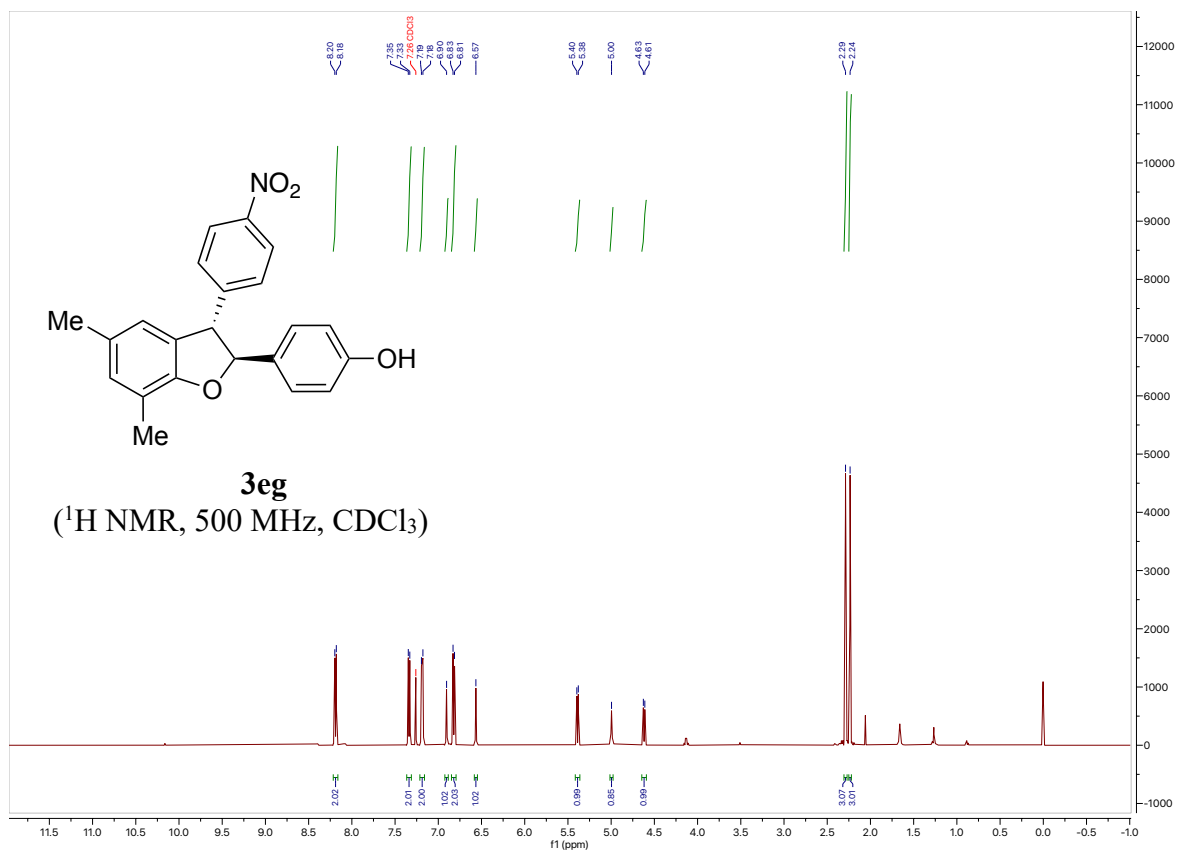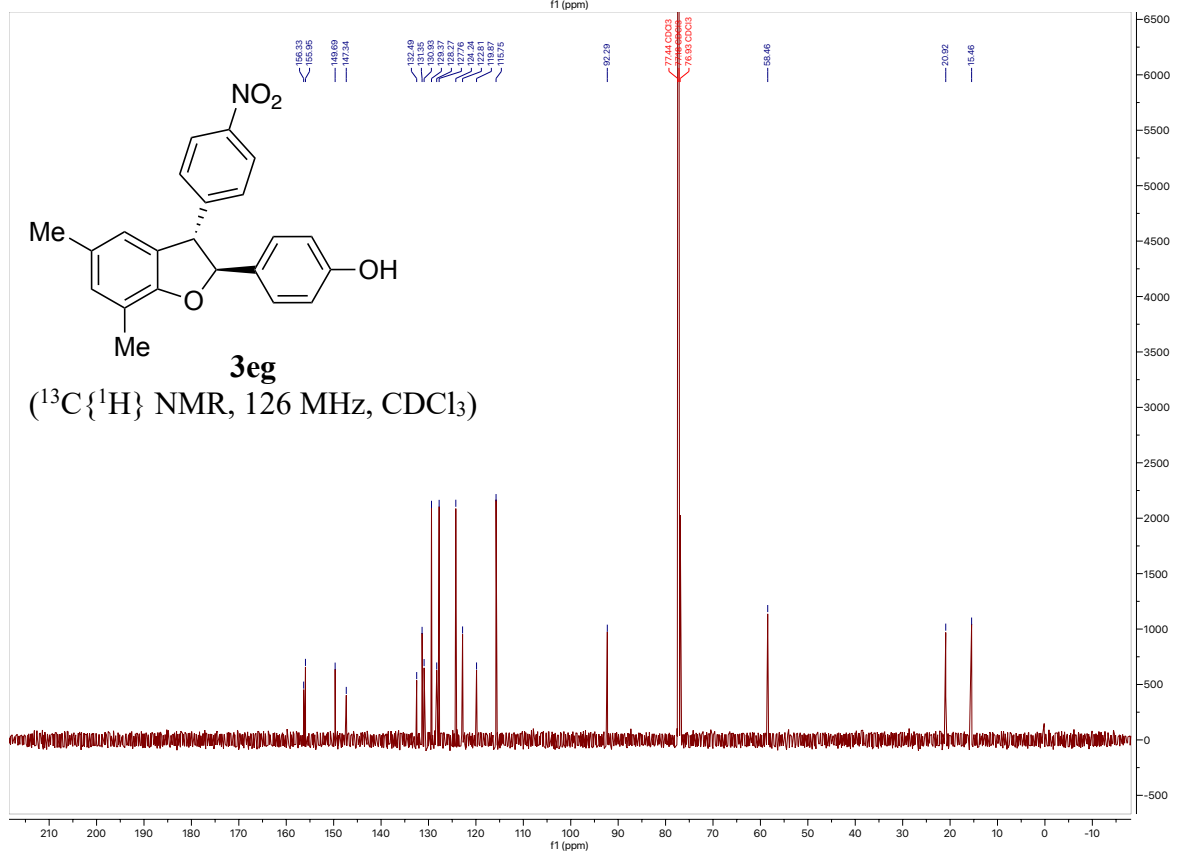

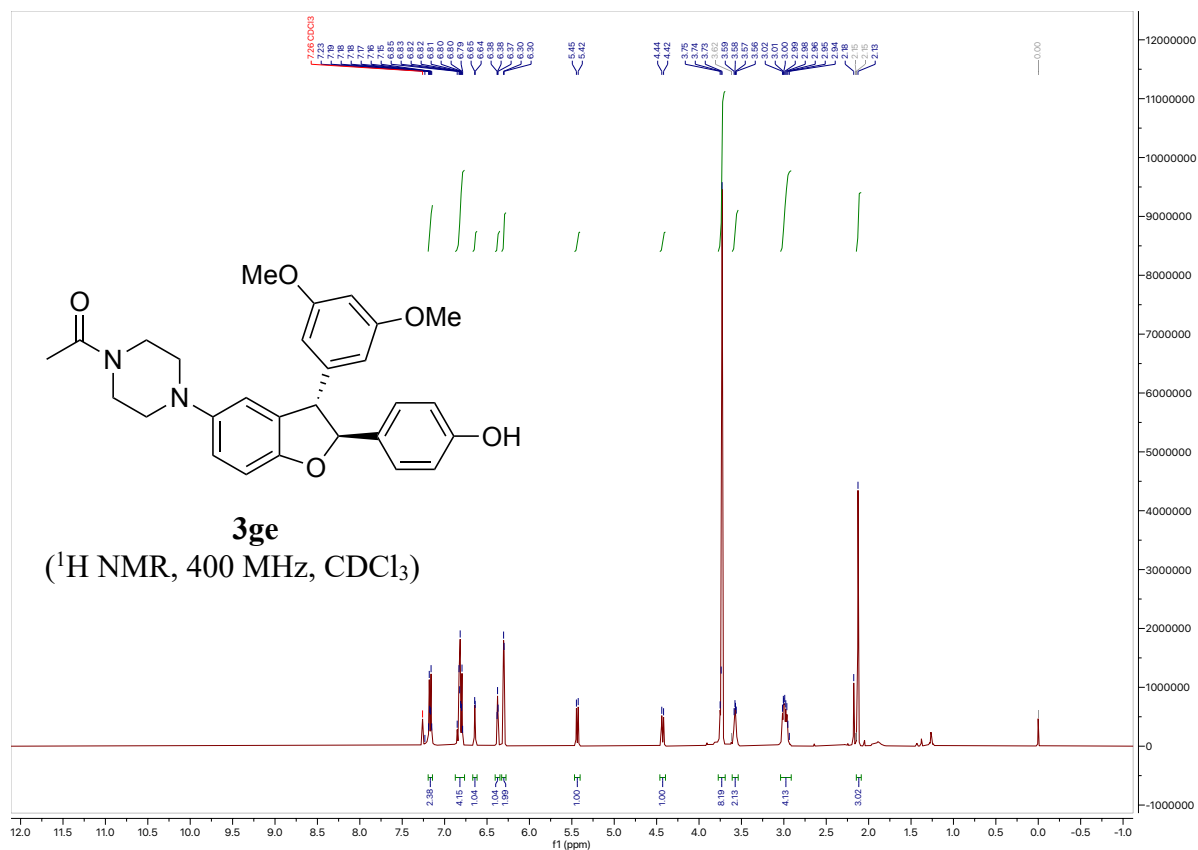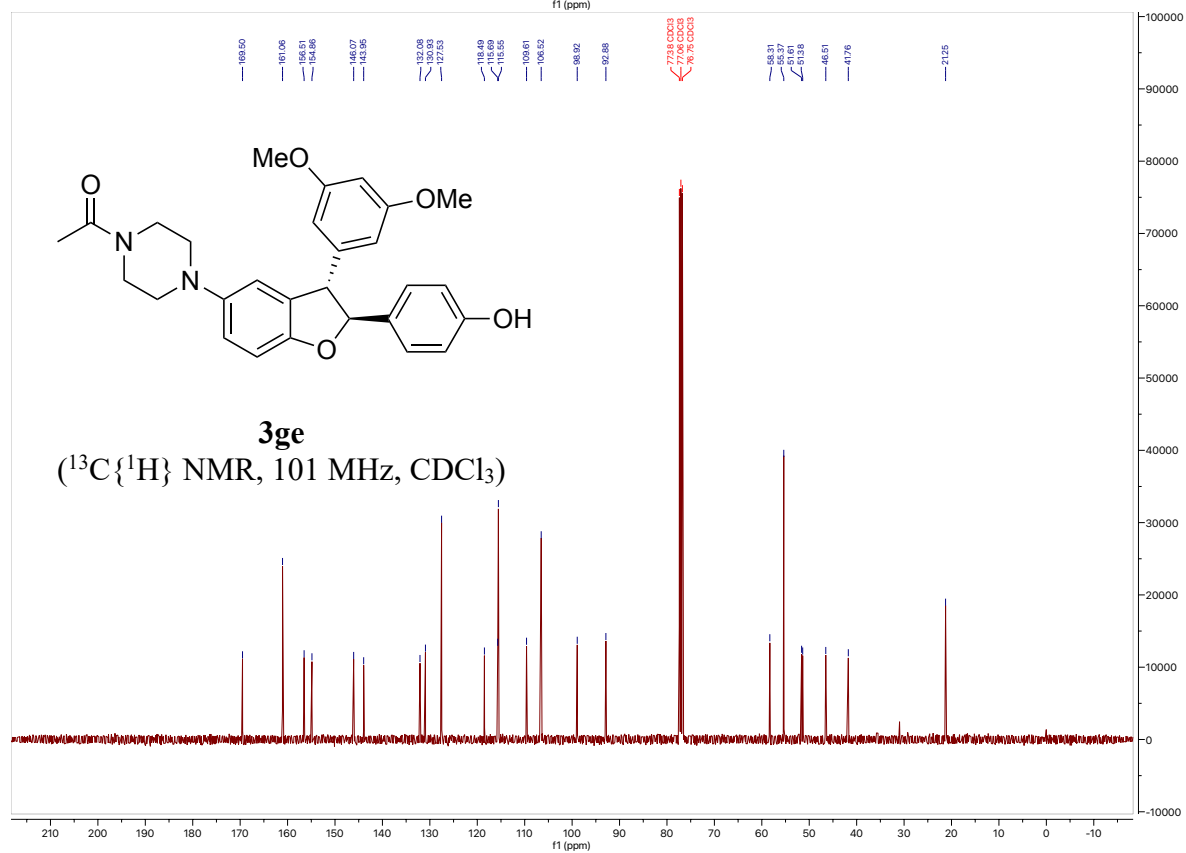



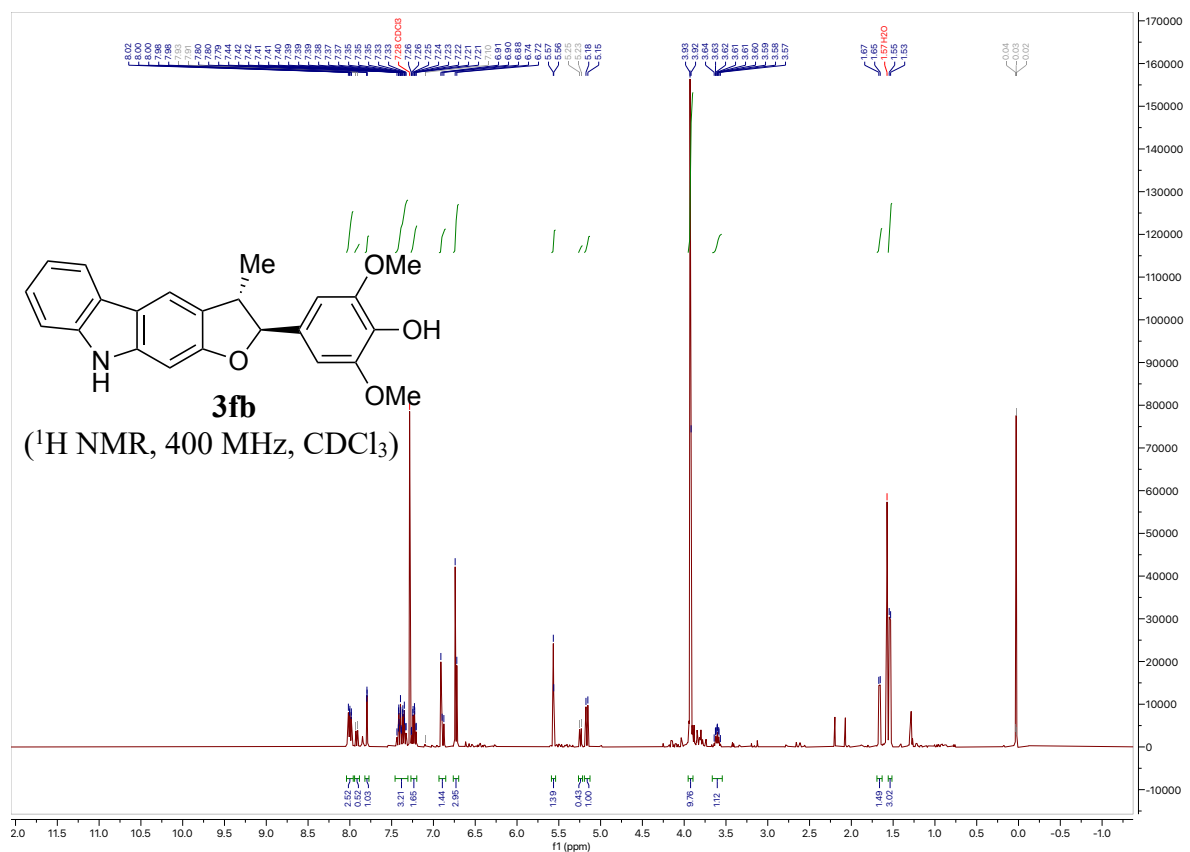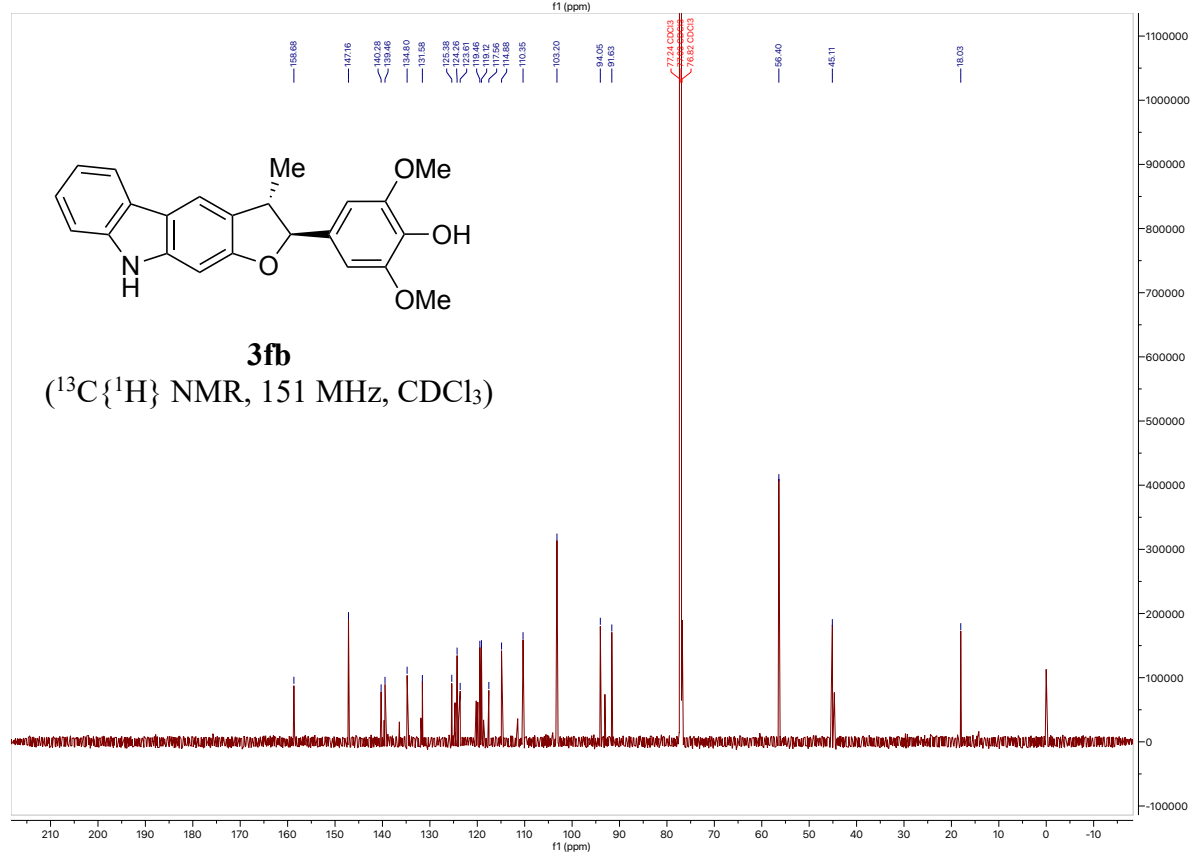

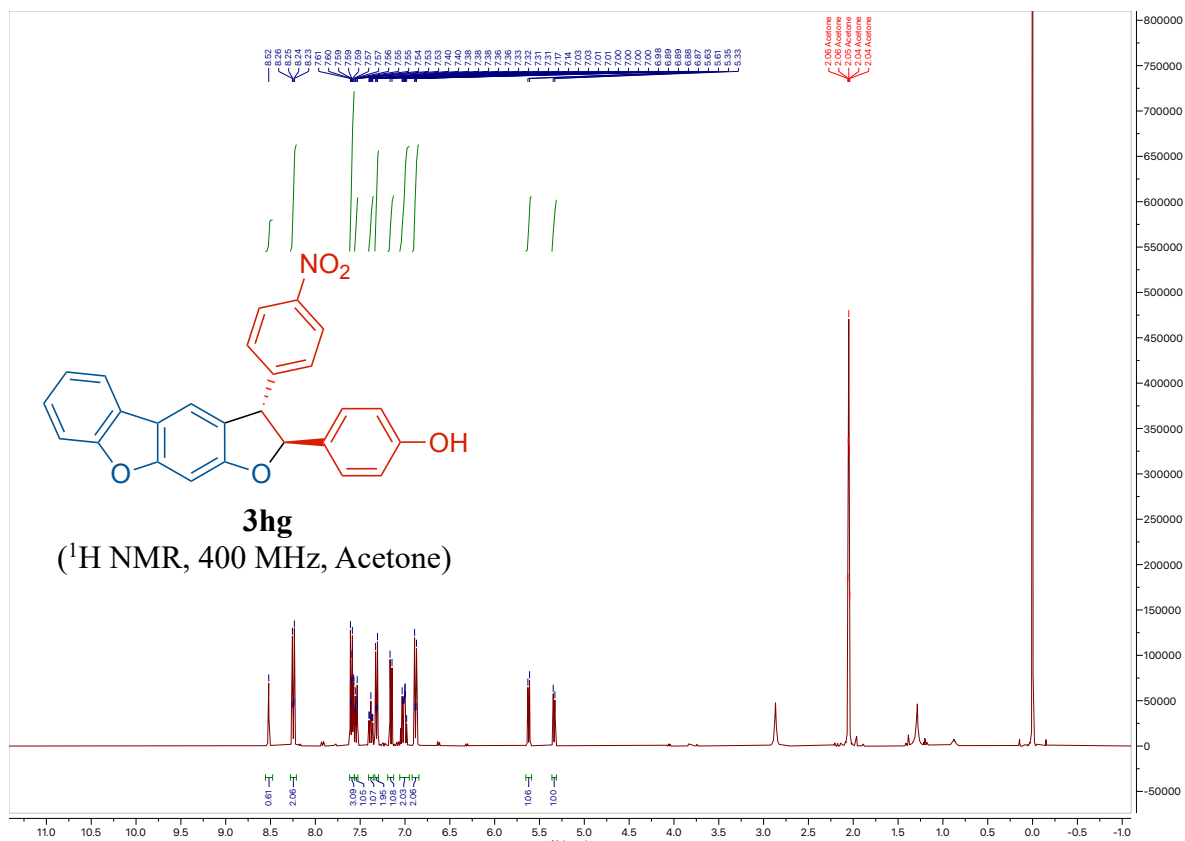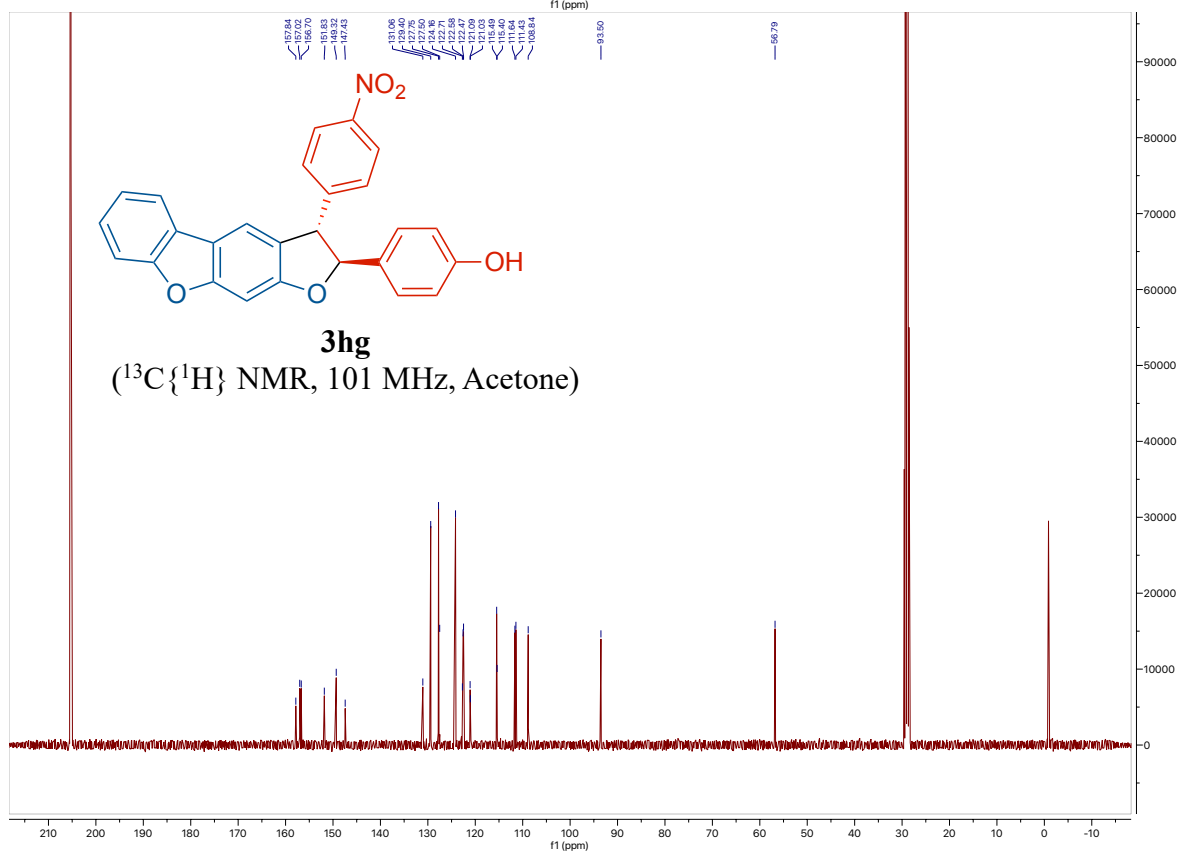





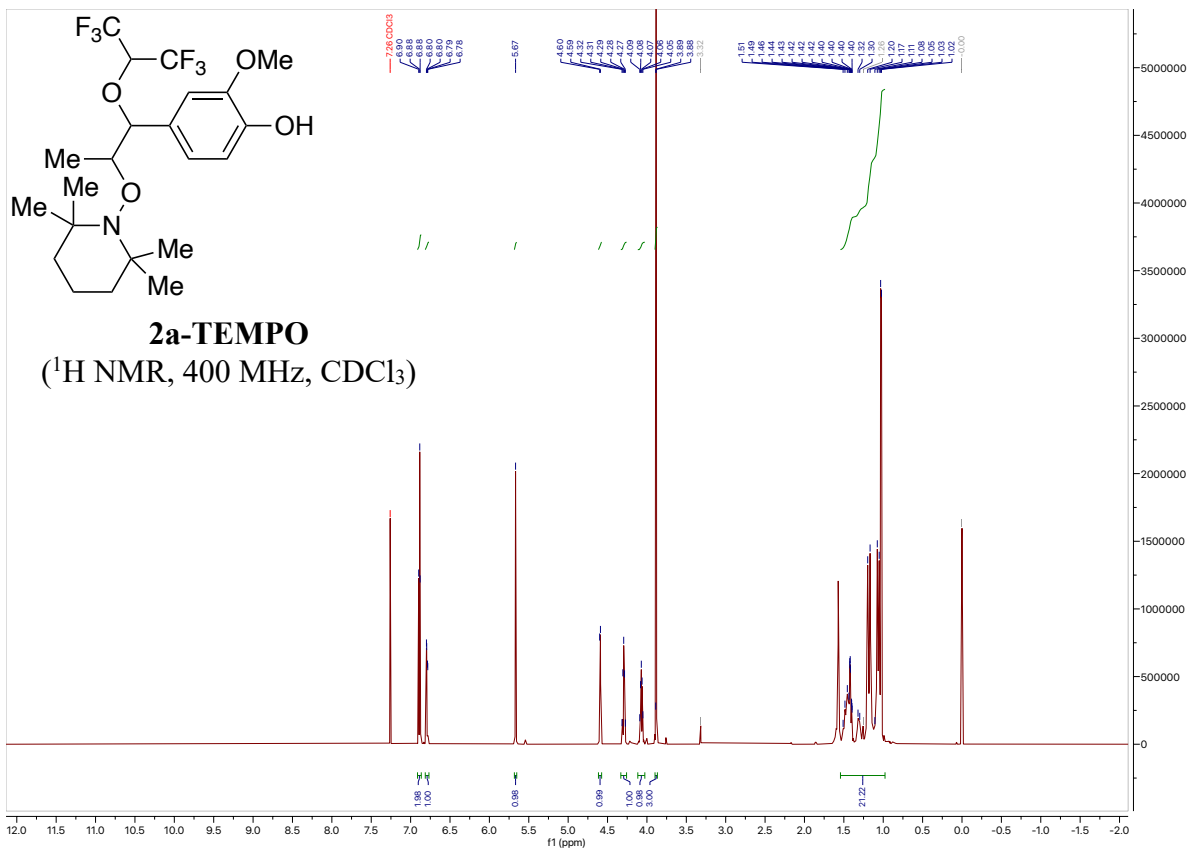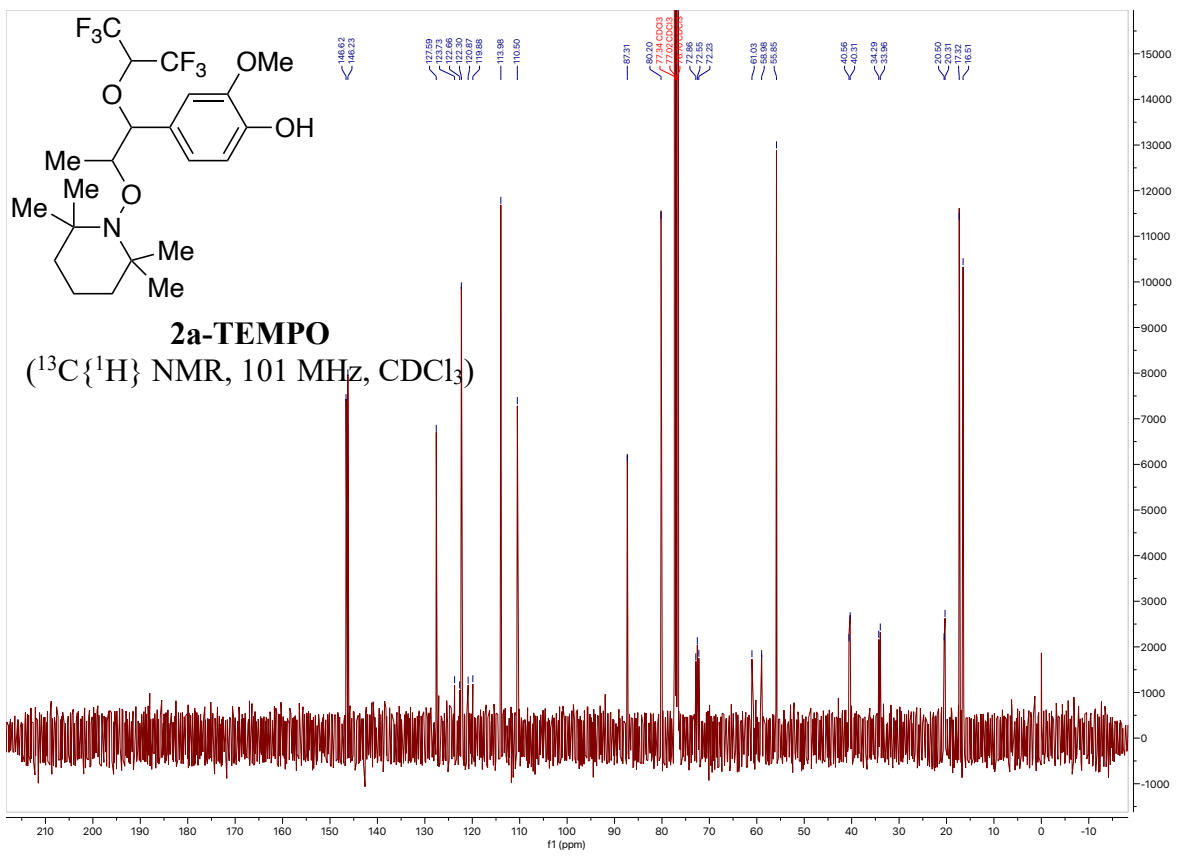

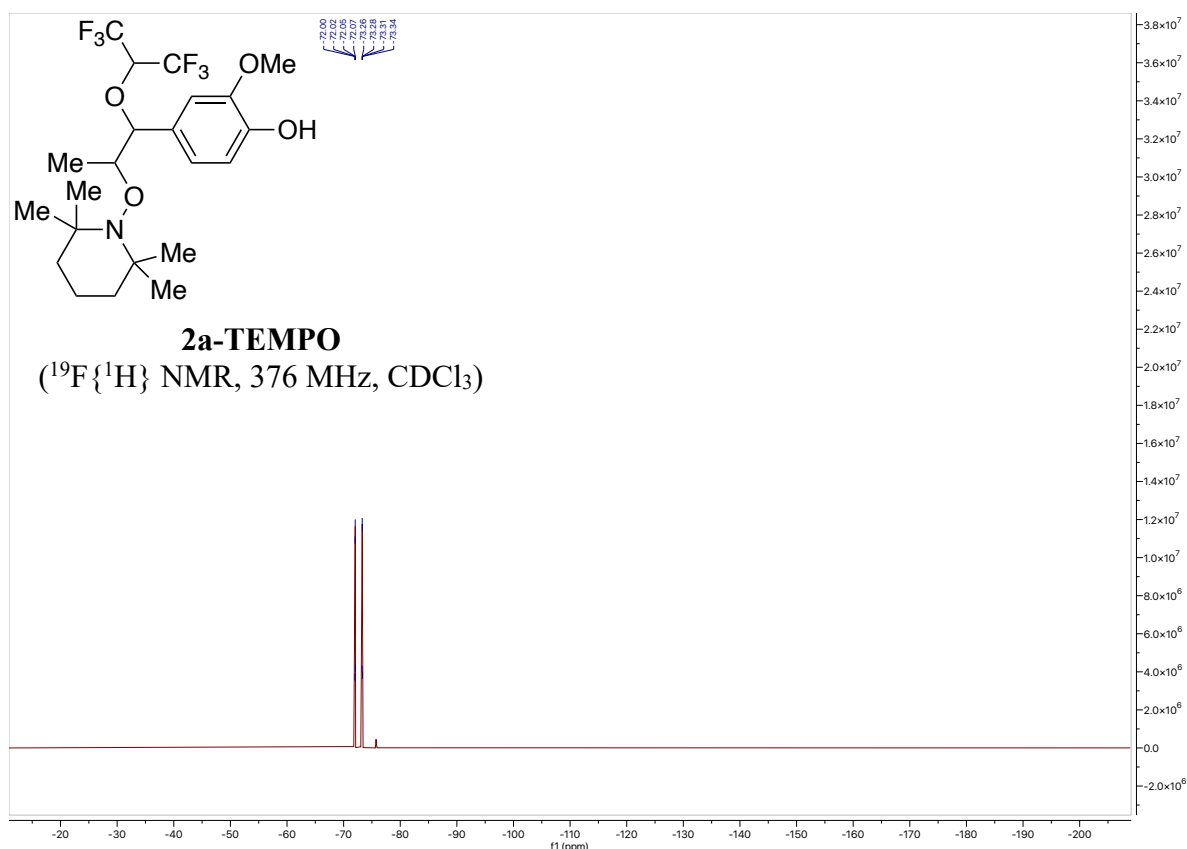

## Supplementary References

- <sup>1</sup> Dong, K.; Zhao, C.-Y.; Wang, X.-J.; Wu, L.-Z.; Liu, Q. Bioinspired Selective Synthesis of Heterodimer 8-5' or 8- O-4' Neolignan Analogs. *Org. Lett.* **2021**, *23*, 2816–2820.
- <sup>2</sup> Challagulla, S.; Tarafder, K.; Ganesan, R.; Roy, S. Structure sensitive photocatalytic reduction of nitroarenes over  $\text{TiO}_2$ . *Sci. Rep.* **2017**, *7*, 8783.
- <sup>3</sup> Zhao, S.; Chong, Z.; Zuo, X.; Qi, W. Construction of Binary RGO/ $\text{TiO}_2$  Fibrous Membranes with Enhanced Mechanical Properties for E. coli Inactivation. *Nanomater.* **2023**, *13*, 2954.
- <sup>4</sup> Saravanana, L.; Kumarb, R. M.; Panduranganc, A.; Jayavela, R. Synthesis and photophysical studies of PVP capped Titania Nanostrips for photocatalytic applications. *J. Optoelectron. Adv. M.* **2010**, *4*, 1676-1680.
- <sup>5</sup> Baader, S., Ohlmann, D.M.; Gooßen, L.J. Isomerizing Ethenolysis as an Efficient Strategy for Styrene Synthesis. *Chem. Eur. J.* **2013**, *19*, 9807-9810.
- <sup>6</sup> Dong, K.; Jin, X.; Chen, S.; Wu, L.; Liu, Q. Controllable synthesis of 2- and 3-aryl-benzomorpholines from 2-aminophenols and 4-vinylphenols. *Chem. Commun.* **2020**, *56*, 7941-7944.
- <sup>7</sup> Liu, H.; Xu, M.; Cai, C.; Chen, J.; Gu, Y.; Xia, Y. Cobalt-Catalyzed Z to E Isomerization of Alkenes: An Approach to (E)- $\beta$ -Substituted Styrenes. *Org. Lett.* **2020**, *22*, 1193–1198.
- <sup>8</sup> Schijndel, J. V.; Molendijk, D.; Beurden, K. V.; Canalle, L. A.; Noël, T.; Meuldijk, J. Preparation of bio-based styrene alternatives and their free radical polymerization. *Eur. Polym. J.* **2020**, *125*, 109534.

- <sup>9</sup> Kundu, G.; Sperger, T.; Rissanen, K.; Schoenebeck, F. A Next-Generation Air-Stable Palladium(I) Dimer Enables Olefin Migration and Selective C–C Coupling in Air. *Angew. Chem. Int. Ed.* **2020**, *59*, 21930–21934.
- <sup>10</sup> (a) Lee, C.; Yang, W.; Parr, R. G., Development of the Colle-Salvetti Correlation-Energy Formula into a Functional of the Electron Density. *Phys. Rev. B.* **1988**, *37*, 785–789. (b) Becke, A. D., Density-Functional Thermochemistry. III. The Role of Exact Exchange. *J. Chem. Phys.* **1993**, *98*, 5648–5652.
- <sup>11</sup> Grimme, S.; Antony, J.; Ehrlich, S.; Krieg, H. A consistent and accurate ab initio parametrization of density functional dispersion correction (DFT-D) for the 94 elements H–Pu. *J. Chem. Phys.* **2010**, *132*, 154104.
- <sup>12</sup> Petersson, G. A.; Al-Laham, M. A. A complete basis set model chemistry. II. Open-shell systems and the total energies of the first-row atoms. *J. Chem. Phys.* **1991**, *94*, 6081–6090.
- <sup>13</sup> David, F.; The role of databases in support of computational chemistry calculations. *J. Comput. Chem.* **1996**, *17*, 1571–1586.
- <sup>14</sup> Fukui, K. The path of chemical reactions - the IRC approach. *Acc. Chem. Res.* **1981**, *14*, 363–368.
- <sup>15</sup> Zhao, Y.; Truhlar, D. G. The M06 suite of density functionals for main group thermochemistry, thermochemical kinetics, noncovalent interactions, excited states, and transition elements: two new functionals and systematic testing of four M06-class functionals and 12 other functionals. *Theor. Chem. Acc.* **2008**, *120*, 215241.
- <sup>16</sup> (a) McLean, A. D.; Chandler, G. S. Contracted Gaussian-basis sets for molecular calculations. 1. 2nd row atoms, Z=11–18. *J. Chem. Phys.* **1980**, *72*, 5639–5648. (b) Raghavachari, K.; Binkley, J. S.; Seeger, R.; Pople, J. A. Self Consistent Molecular Orbital Methods. 20. Basis set for correlated wave-functions. *J. Chem. Phys.* **1980**, *72*, 650654.
- <sup>17</sup> Cossi, M.; Rega, N.; Scalmani, G.; Barone, V. Energies, structures, and electronic properties of molecules in solution with the C-PCM solvation model. *J. Comput. Chem.* **2003**, *24*, 669–681.
- <sup>18</sup> Ribeiro, R. F.; Marenich, A. V.; Cramer, C. J.; Truhlar, D. G. Use of Solution-Phase Vibrational Frequencies in Continuum Models for the Free Energy of Solvation. *J. Phys. Chem. B.* **2011**, *115*, 14556–14562.
- <sup>19</sup> Funes-Ardoiz, I.; Paton, R. S. 2016. GoodVibes: GoodVibes 2.0.2. <http://doi.org/10.5281/zenodo.595246>
- <sup>20</sup> O'Boyle, N. M.; Tenderholt, A. L.; Langner, K. M. *J. Comp. Chem.* **2008**, *29*, 839–845.
- <sup>21</sup> CYLview20; Legault, C. Y., Université de Sherbrooke, 2020 (<http://www.cylview.org>).
- <sup>22</sup> Lu, T.; Chen, F. Multiwfn: A Multifunctional Wavefunction Analyzer. *J. Comput. Chem.* **2012**, *33*, 580–592.
- <sup>23</sup> Humphrey, W.; Dalke, A.; Schulten, K., VMD – Visual Molecular Dynamics. *J. Mol. Graphics.* **1996**, *14*, 33–38.
