# Supplementary material for: Visible-light TiO2-catalyzed synthesis of dihydrobenzofurans by oxidative [3 + 2] annulation of phenols with alkenyl phenols
Source: Royal Society of Chemistry journal article supplement (doi:10.1039/d4sc00723a), 2024-01-01
Supplement: d4sc00723a3.zip [file d4sc00723a3.zip]

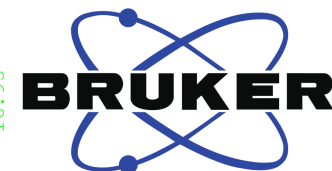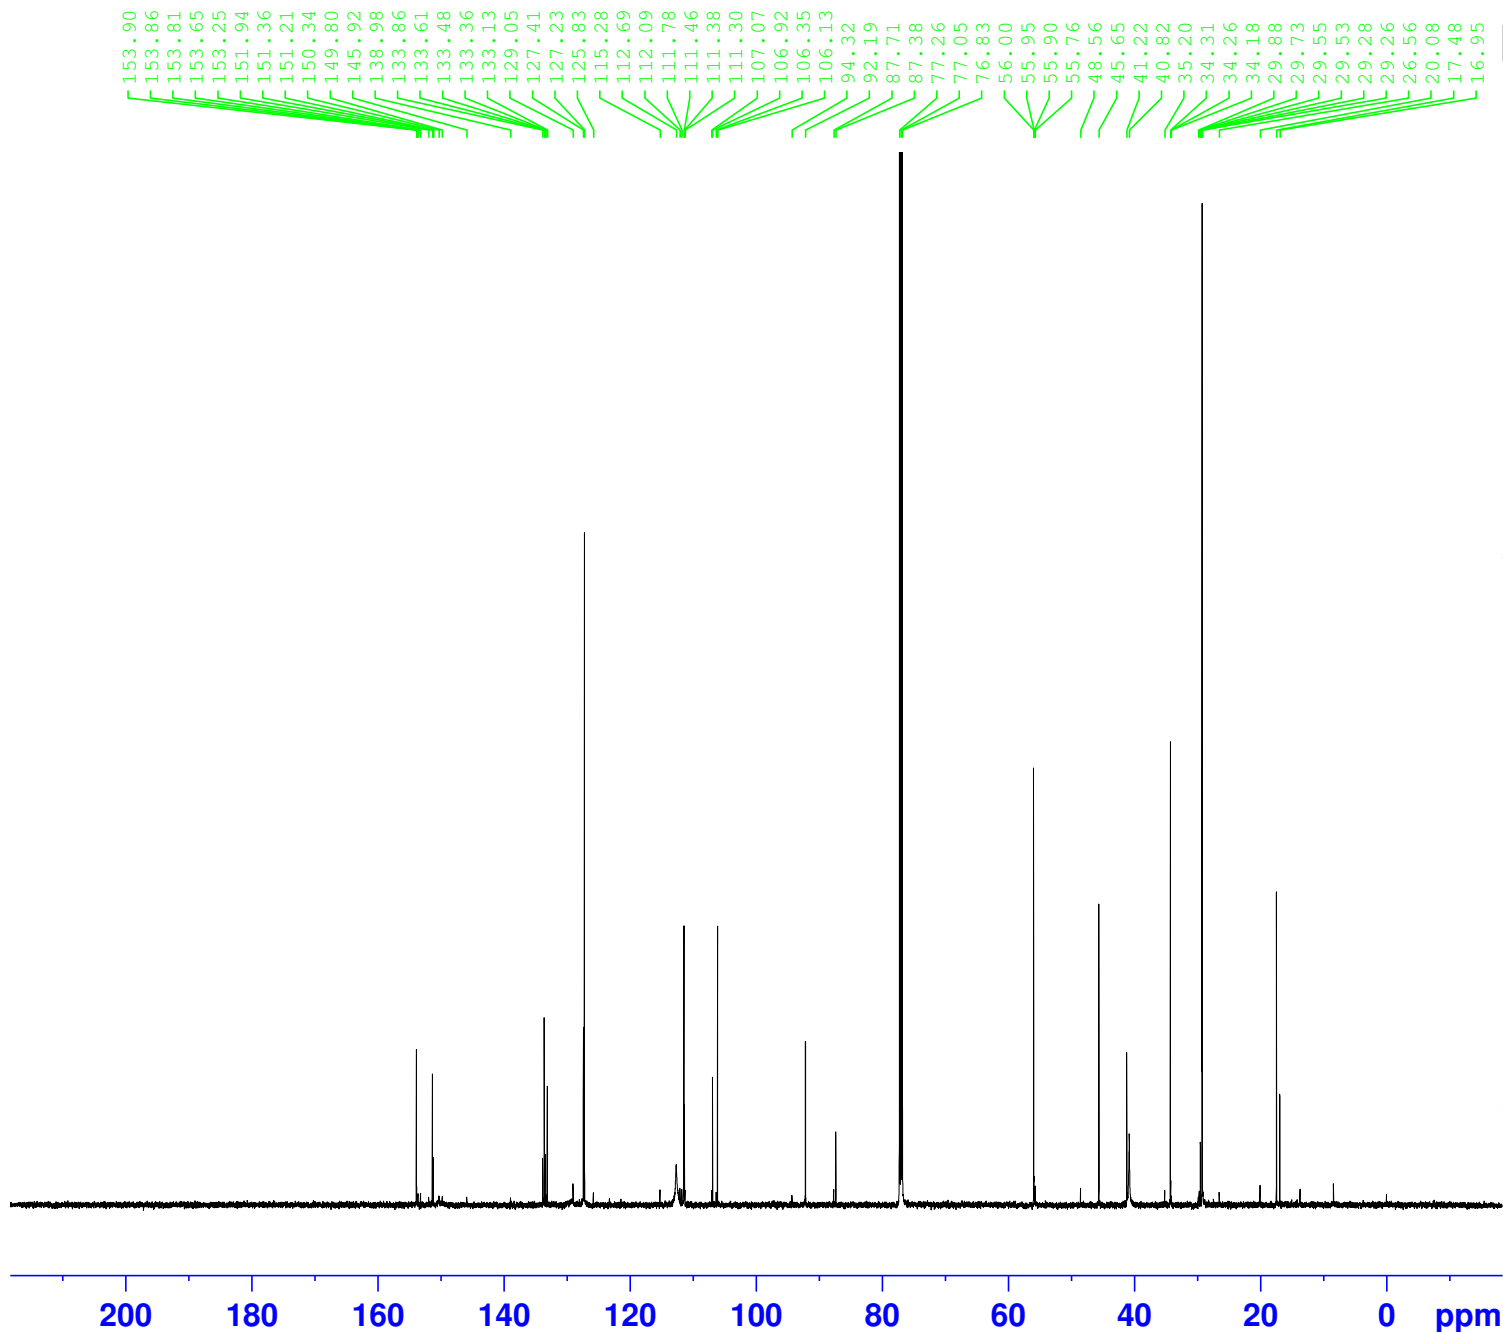

Current Data Parameters  
NAME JW-I-144-13C-600mhz  
EXPNO 12  
PROCNO 1

F2 - Acquisition Parameters  
Date\_ 20230905  
Time 15.47 h  
INSTRUM Avance 4 NEO 600  
PROBHD Z168773\_0007 (  
PULPROG zgpg30  
TD 65536  
SOLVENT CDCl3  
NS 256  
DS 4  
SWH 35714.286 Hz  
FIDRES 1.089913 Hz  
AQ 0.9175040 sec  
RG 101  
DW 14.000 usec  
DE 18.00 usec  
TE 298.0 K  
D1 2.00000000 sec  
D11 0.03000000 sec  
TD0 1  
SFO1 150.9178988 MHz  
NUC1 13C  
P0 3.50 usec  
P1 10.50 usec  
PLW1 68.97799683 W  
SFO2 600.1324005 MHz  
NUC2 1H  
CPDPRG[2] waltz65  
PCPD2 70.00 usec  
PLW2 18.62700081 W  
PLW12 0.54741001 W  
PLW13 0.27533999 W

F2 - Processing parameters  
SI 32768  
SF 150.9028085 MHz  
WDW EM  
SSB 0  
LB 1.00 Hz  
GB 0  
PC 1.40
