# Supplementary material for: Visible-light TiO2-catalyzed synthesis of dihydrobenzofurans by oxidative [3 + 2] annulation of phenols with alkenyl phenols
Source: Royal Society of Chemistry journal article supplement (doi:10.1039/d4sc00723a), 2024-01-01
Supplement: d4sc00723a3.zip [file d4sc00723a3.zip]

155.40  
153.06  
152.56  
151.95  
147.42  
147.30  
147.12  
146.94  
134.71  
132.78  
132.44  
132.13  
132.00  
131.91  
131.27  
131.18  
131.12  
130.33  
130.09  
129.99  
129.85  
129.01  
127.45  
127.09  
127.02  
123.58  
122.29  
121.40  
119.26  
118.24  
116.80  
115.19  
114.77  
105.78  
103.46  
103.28  
101.14  
95.83  
95.70  
92.92  
77.27  
77.06  
76.85  
61.01  
56.45  
56.38  
56.32  
56.28  
56.03  
45.93  
45.81  
41.46  
37.66  
36.15  
29.72  
20.82  
20.68  
20.50  
19.27  
17.59  
17.15  
16.14  
15.84  
15.81  
15.32  
15.26

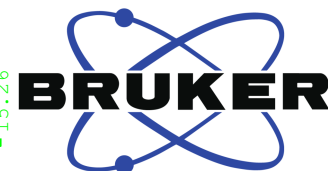

Current Data Parameters  
NAME YL-I-117-13C  
EXPNO 1  
PROCNO 1

F2 - Acquisition Parameters  
Date\_ 20230920  
Time 17.06 h  
INSTRUM Avance 4 NEO 600  
PROBHD Z168773\_0007 (  
PULPROG zgpg30  
TD 65536  
SOLVENT CDCl3  
NS 512  
DS 4  
SWH 35714.286 Hz  
FIDRES 1.089913 Hz  
AQ 0.9175040 sec  
RG 101  
DW 14.000 usec  
DE 18.00 usec  
TE 298.0 K  
D1 2.00000000 sec  
D11 0.03000000 sec  
TD0 1  
SFO1 150.9178988 MHz  
NUC1 13C  
P0 3.50 usec  
P1 10.50 usec  
PLW1 68.97799683 W  
SFO2 600.1324005 MHz  
NUC2 1H  
CPDPRG[2] waltz65  
PCPD2 70.00 usec  
PLW2 18.62700081 W  
PLW12 0.54741001 W  
PLW13 0.27533999 W

F2 - Processing parameters  
SI 32768  
SF 150.9028085 MHz  
WDW EM  
SSB 0  
LB 1.00 Hz  
GB 0  
PC 1.40

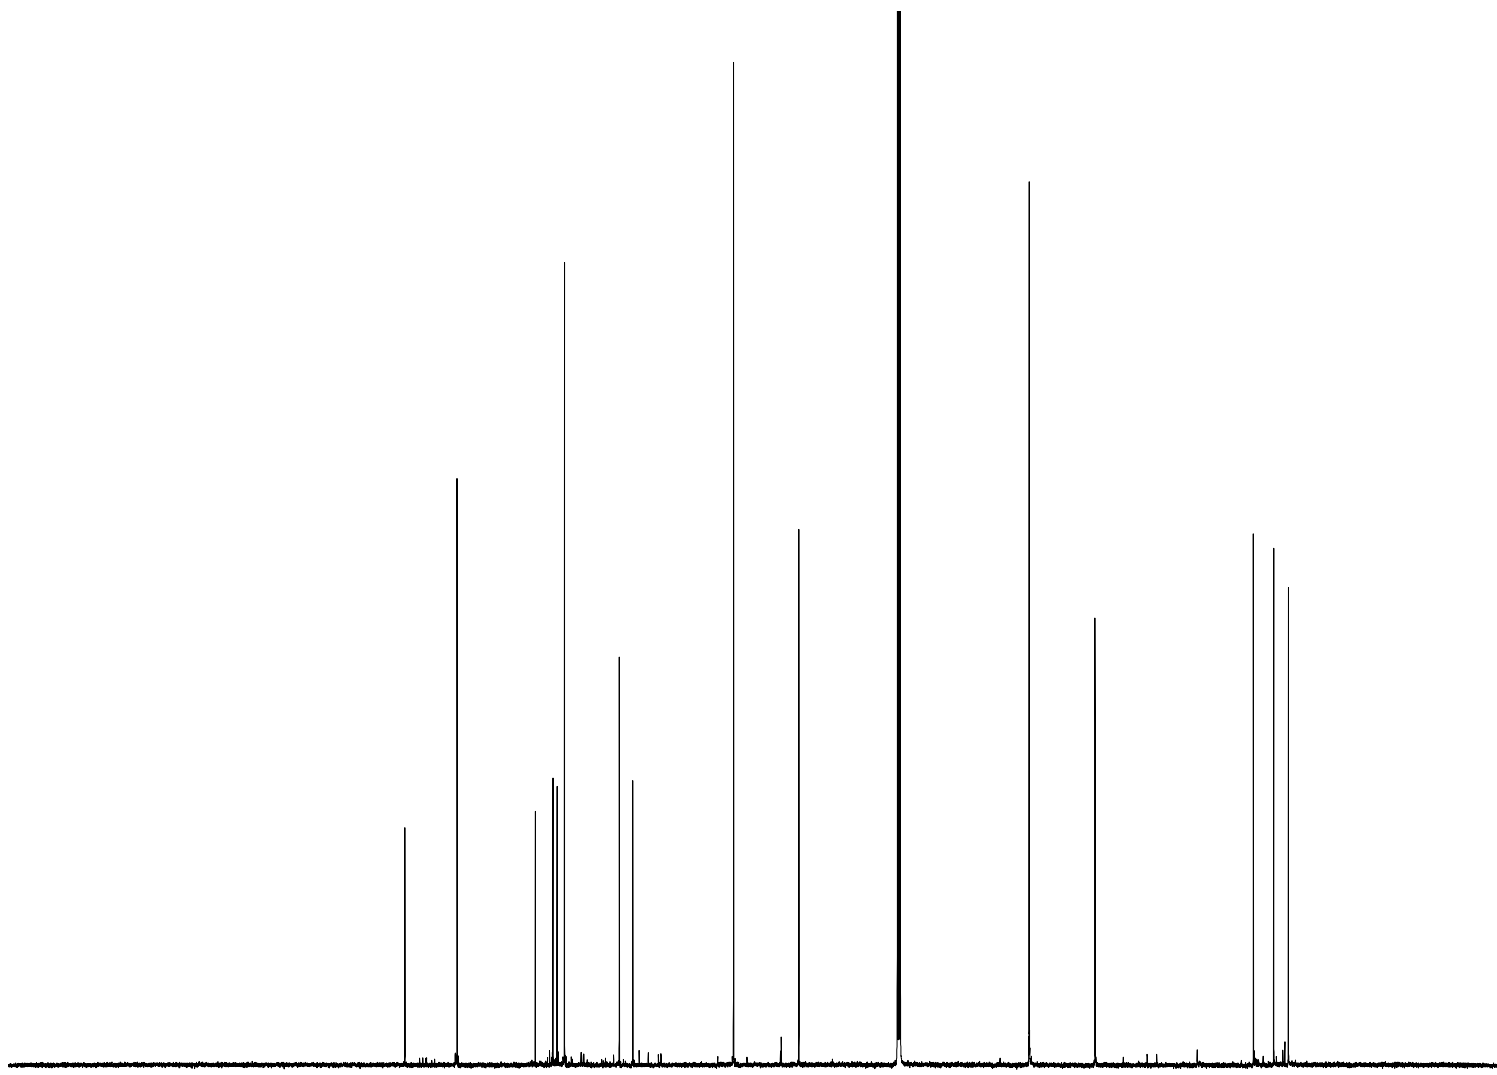

200 180 160 140 120 100 80 60 40 20 0 ppm
