# Supplementary material for: Visible-light TiO2-catalyzed synthesis of dihydrobenzofurans by oxidative [3 + 2] annulation of phenols with alkenyl phenols
Source: Royal Society of Chemistry journal article supplement (doi:10.1039/d4sc00723a), 2024-01-01

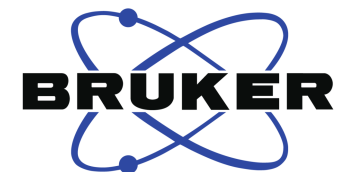

Current Data Parameters  
NAME JW-I-144-1H-600mhz  
EXPNO 10  
PROCNO 1

F2 - Acquisition Parameters  
Date\_ 20230905  
Time 15.33 h  
INSTRUM Avance 4 NEO 600  
PROBHD Z168773\_0007 (  
PULPROG zg30  
TD 65536  
SOLVENT CDCl3  
NS 16  
DS 2  
SWH 11904.762 Hz  
FIDRES 0.363304 Hz  
AQ 2.7525120 sec  
RG 101  
DW 42.000 usec  
DE 24.20 usec  
TE 298.0 K  
D1 1.00000000 sec  
TD0 1  
SFO1 600.1337058 MHz  
NUC1 1H  
P0 4.00 usec  
P1 12.00 usec  
PLW1 18.62700081 W

F2 - Processing parameters  
SI 65536  
SF 600.1300246 MHz  
WDW EM  
SSB 0  
LB 0.30 Hz  
GB 0  
PC 1.00

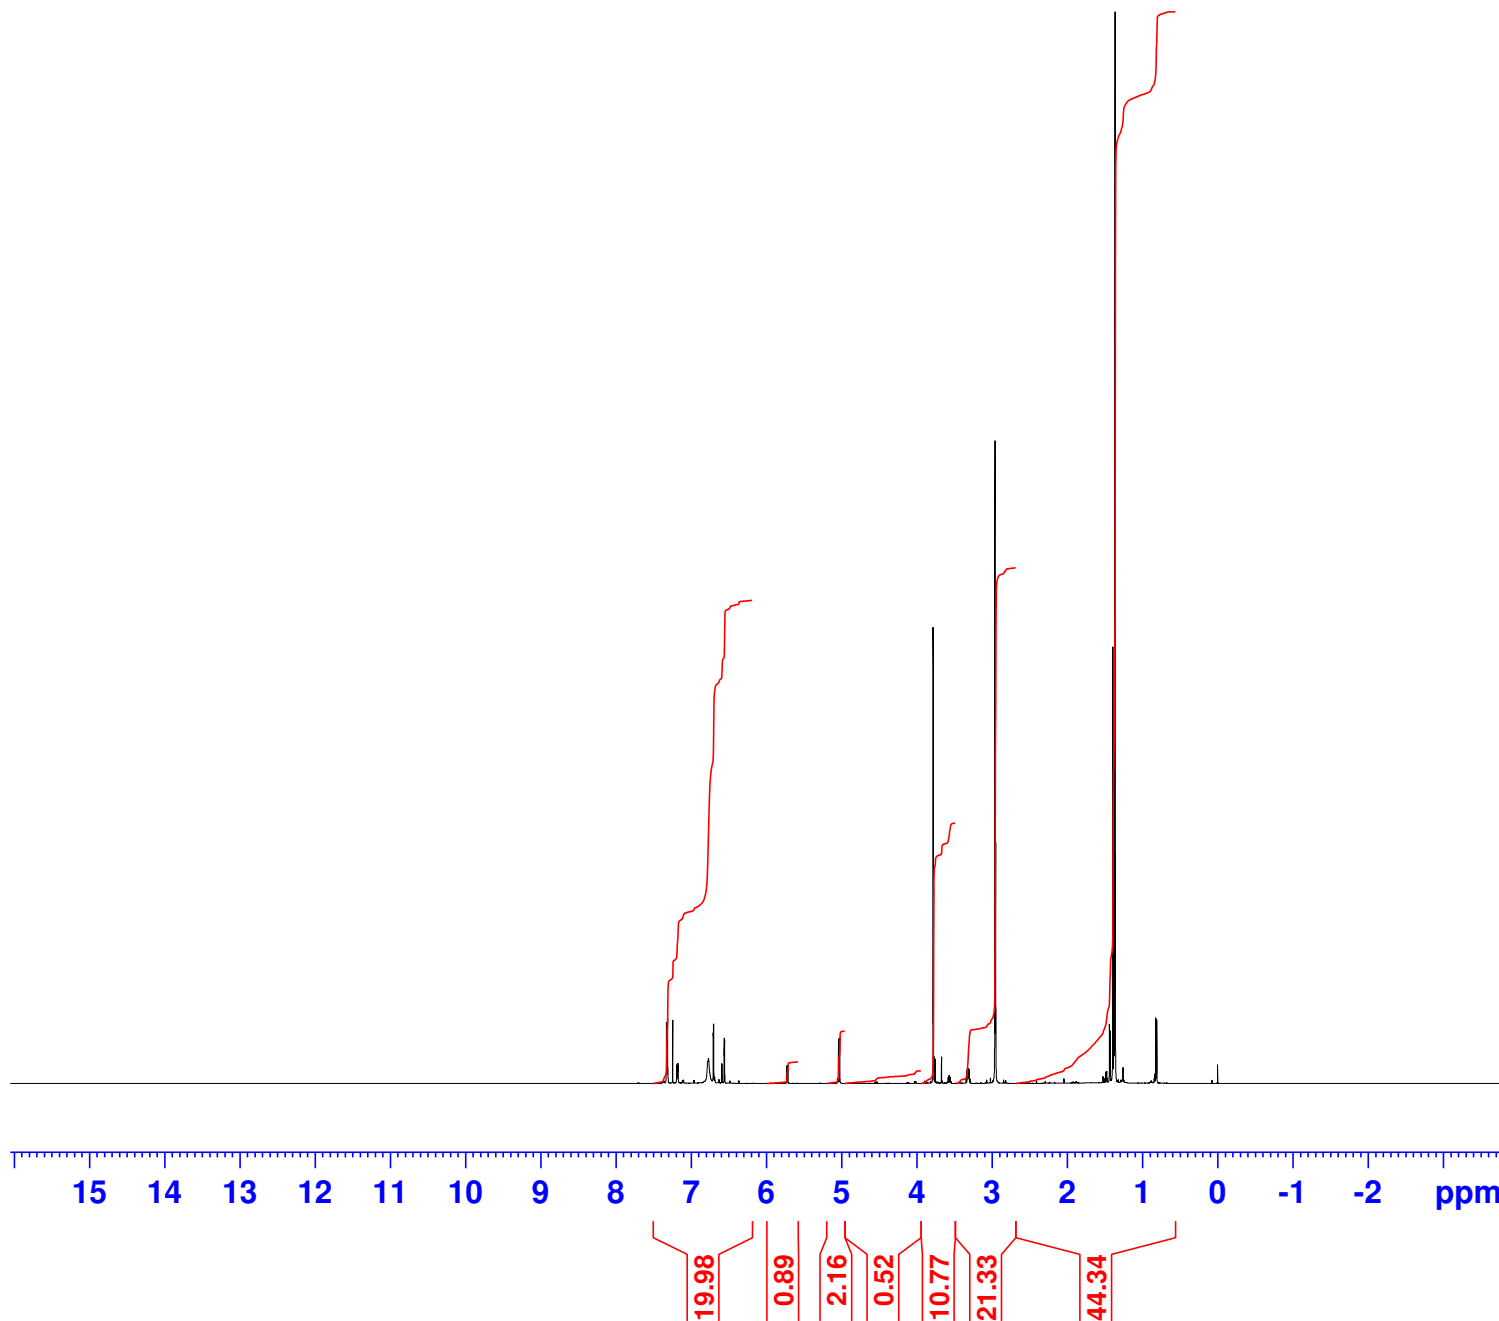

Supplement: d4sc00723a3.zip [file d4sc00723a3.zip]
